# Supplementary material
Source: PubMed Central journal article supplement (PMC5994177)
Supplement: NIHMS937706-supplement-supplement_1.pdf [file NIHMS937706-supplement-supplement_1.pdf]

1 **Figure Legends**

2 **Figure E1:** Schematic of the timeline of the experimental approach, and the use of different PA  
3 cohorts.

4

5 **Figure E2.** Gating strategy and kinetics of CD3+CD4+ T cell CD154+ responses to peanut  
6 stimulation. A. Representative FACS plot for gating on lymphocyte scatter, singlet, live,  
7 CD3+CD4+ T cells and assessing CD154 expression after 6hrs of 100ug/mL CPE stimulation.  
8 CD154+ gating was based on unstimulated cells. B. Kinetics of CD154+ T cell (left panel) or  
9 cytokine+CD154+ T cell (right panel) response over time (0-18 hours) in peanut allergic subjects  
10 (n=4).

11

12 **Figure E3.** Frequency of peanut-responsive CD154+IL4+ and CD154+IL13+ cells by age in the PA  
13 group (MSSM cohort). The spearman correlation of age vs Th2 frequency was 0.093, p = 0.46  
14 (IL-13) and 0.089, p = 0.48 (IL-4).

15

16 **Figure E4.** CRTH2 expression. (A): Titration curve (0 – 5 ul of antibody per test) showing staining  
17 of CD123+ basophils (top row) and CD3+CD4+ T cells (bottom row) for CRTH2. Representative  
18 staining showing CRTH2 versus CD154 staining (B) or versus IL-4 or IL-5 (C) after stimulation  
19 with peanut or PMA/ionomycin for 6h.

20

21 **Figure E5.** Identification of CD154+ Tregs. A. Representative FACS gating for identification of  
22 CD154+FoxP3+CD25+CD127<sup>low</sup> Tregs after 100ug/mL CPE stimulation (Peanut, bottom row) for  
23 18 hours. Sample is from a peanut allergic subject. Numbers are indicated percent frequencies  
24 of parent gate. B. Kinetic analysis of %CD154 expression on FoxP3+CD25+CD127<sup>-</sup> Tregs in  
25 response to stimulation with 100ug/mL peanut (n=7) or anti-CD3/CD28 (n=6) stimulation over  
26 time (0 to 18 hours) in PA subjects. C. Impact of CD25 depletion prior to stimulation on  
27 detectable CD154+Foxp3+CD25+CD127<sup>low</sup> T cells after stimulation with peanut.

28

29 **Figure E6:** Expression of memory and differentiation markers on CD154+ Tregs after stimulation  
30 with crude peanut extract (CPE) or anti-CD3/CD28.

31

32 **Figure E7:** A. Identification of differentially expressed genes when comparing CD154-captured T  
33 cells after anti-CD3/CD28 stimulation and freshly sorted CD4+CD25+CD127+ Tregs from healthy  
34 controls. Differentially expressed genes, indicated in blue, were used as guide genes to  
35 construct the minimum spanning tree. B. Representation of cells in each state by subject ID.  
36 Samples 1434, 1435, 1436, 1508, HD51, HD53, HD54, HD64 were freshly sorted Tregs, the  
37 remainder were CD154-selected T cells from peanut allergic subjects after stimulation with  
38 peanut or anti-CD3/CD28.

39

40 **Figure E8:** Expression of IL2, IL5, and IL9 overlaid on the state map. Expression level in each cell  
41 is indicated by intensity of color.

42

43 **Figure E9:** Computational assignment of cell cycle stage of single cells, color coded by state.

44

45 **Figure E10:** The length distribution of the reconstructed TCR sequence (alpha and beta) is  
46 shown to be tightly peaked around 340 bp, strongly suggesting that full TCR sequences are  
47 being captured and assembled.

48

49 **Figure 11:** A: Sequence of the TCR CDR region of the 4 clones identified in Subject 1401. B:  
50 Placement of clones on the minimum spanning tree, with shaded areas identifying the three  
51 states. C: Differentially expressed genes comparing the 8 clonal cells to the 32 remaining non-  
52 clonal cells in Subject 1401.

53

54

55

56

57 **Table E1: Peanut-responsive Th2 Detection panel (Figure 1,2)**

| <b>Marker</b>  | <b>Clone</b> | <b>Fluorophore</b>   | <b>Company</b>           |
|----------------|--------------|----------------------|--------------------------|
| Live/Dead Aqua | N/A          | AmCyan               | Thermo Fisher Scientific |
| CD3            | SK7          | APC-Cy7              | eBioscience              |
| CD4            | OKT4         | Brilliant Violet 605 | BioLegend                |
| CD25           | BC96         | Brilliant Violet 650 | BioLegend                |
| CD127          | A019D5       | Brilliant Violet 785 | BioLegend                |
| CXCR5          | RF8B2        | Alexa Fluor 488      | BD Biosciences           |
| CCR4           | 1G1          | PerCP-Cy5.5          | BD Biosciences           |
| CCR6           | 11A9         | PE-Cy7               | BD Biosciences           |
| CD154          | 24-31        | PE                   | eBioscience              |
| IFN $\gamma$   | B27          | Alexa Fluor 700      | BD Biosciences           |
| IL-4           | MP4-25D2     | Alexa Fluor 647      | BioLegend                |
| IL-10          | JES3-19F1    | PE-CF594             | BD Biosciences           |
| IL-13          | JES10-5A2    | BD Horizon V450      | BD Biosciences           |

58

59

60 **TABLE E2: Peanut-responsive effector T cell phenotyping staining panel (Figure 3)**

| <b>Marker</b>  | <b>Clone</b> | <b>Fluorophore</b>   | <b>Company</b>           |
|----------------|--------------|----------------------|--------------------------|
| Live/Dead Blue | N/A          | DAPI                 | Thermo Fisher Scientific |
| CD3            | SK7          | APC-Cy7              | eBioscience              |
| CD4            | RPA-T4       | PE-CF594             | BD Biosciences           |
| CD27           | M-T271       | PerCP-Cy5.5          | BioLegend                |
| CD45RO         | UCHL1        | Brilliant Violet 785 | BioLegend                |
| CRTH2          | BM16         | PE-Cy7               | BioLegend                |
| CCR7           | G043H7       | Brilliant Violet 510 | BioLegend                |
| CD161          | HP-3G10      | eFluor 450           | eBioscience              |
| CD154          | 24-31        | PE                   | eBioscience              |
| IL-4           | MP4-25D2     | Alexa Fluor 488      | BioLegend                |
| IL-5           | TRFK5        | Brilliant Violet 421 | BioLegend                |
| IL-9           | MH9A4        | Alexa Fluor 647      | BioLegend                |

61

62

63 **TABLE E3: Peanut-responsive Treg detection panel (Figure 4)**

| <b>Marker</b>  | <b>Clone</b> | <b>Fluorophore</b>  | <b>Company</b>           |
|----------------|--------------|---------------------|--------------------------|
| Live/Dead Aqua | N/A          | AmCyan              | Thermo Fisher Scientific |
| CD3            | SK7          | APC-Cy7             | eBioscience              |
| CD4            | OKT4         | Briliant Violet 605 | BioLegend                |
| CD25           | BC96         | Briliant Violet 650 | BioLegend                |
| CD127          | A019D5       | Briliant Violet 785 | BioLegend                |
| CCR4           | 1G1          | PerCP-Cy5.5         | BD Biosciences           |
| CCR6           | 11A9         | PE-Cy7              | BD Biosciences           |
| CD154          | 24-31        | PE                  | eBioscience              |
| IFN $\gamma$   | B27          | Alexa Fluor 700     | BD Biosciences           |
| IL-10          | JES3-19F1    | PE-CF594            | BD Biosciences           |
| FoxP3          | 206D         | Alexa Fluor 647     | BioLegend                |

64

65

66 **TABLE E4: Peanut-responsive Treg phenotyping panel (Figure 4)**

| Marker         | Clone  | Fluorophore          | Company                  |
|----------------|--------|----------------------|--------------------------|
| Live/Dead Blue | N/A    | DAPI                 | Thermo Fisher Scientific |
| CD3            | SK7    | APC-Cy7              | eBioscience              |
| CD4            | RPA-T4 | PE-CF594             | BD Biosciences           |
| CD25           | BC96   | Alexa Fluor 700      | BioLegend                |
| CD127          | A019D5 | Briliant Violet 785  | BioLegend                |
| CD27           | M-T271 | PerCP-Cy5.5          | BioLegend                |
| CD45RO         | UCHL1  | Pacific Blue         | BioLegend                |
| CRTH2          | BM16   | PE-Cy7               | BioLegend                |
| CCR7           | G043H7 | Brilliant Violet 510 | BioLegend                |
| CD154          | 24-31  | PE                   | eBioscience              |
| FoxP3          | 206D   | Alexa Fluor 647      | BioLegend                |

67

68

69

70 **Table E5: Sensitivity, ProcartaPlex Human Cytokine Panel 1B**

71

| <b>Cytokine</b> | <b>Sensitivity<br/>(pg/ml)</b> |
|-----------------|--------------------------------|
| GM-CSF          | 1.2                            |
| IFN-alpha       | 0.2                            |
| IFN-gamma       | 0.2                            |
| IL-1RA          | 17.8                           |
| IL-1 alpha      | 0.1                            |
| IL-1 beta       | 0.2                            |
| IL-2            | 0.8                            |
| IL-4            | 1.5                            |
| IL-5            | 0.3                            |
| IL-6            | 0.4                            |
| IL-7            | 0.2                            |
| IL-9            | 0.5                            |
| IL-10           | 0.1                            |
| IL-12p70        | 0.04                           |
| IL-13           | 0.1                            |
| IL-15           | 1.1                            |
| IL-17A          | 0.1                            |
| IL-18           | 0.4                            |
| IL-21           | 0.6                            |
| IL-22           | 8.2                            |
| IL-23           | 0.9                            |
| IL-27           | 5.1                            |
| IL-31           | 3.3                            |
| TNF alpha       | 0.4                            |
| TNF beta        | 1.6                            |

72 **Table E6: Sensitivity, LEGENDplex™ Human Th Cytokine Panel**

73

| <b>Cytokine</b> | <b>Sensitivity<br/>(pg/ml)</b> |
|-----------------|--------------------------------|
| IL-5            | 1.1                            |
| IL-13           | 0.8                            |
| IL-2            | 1.0                            |
| IL-6            | 1.1                            |
| IL-9            | 1.0                            |
| IL-10           | 1.1                            |
| IFN-gamma       | 1.0                            |
| TNF-alpha       | 1.0                            |
| IL-17A          | 1.5                            |
| IL-17F          | 1.1                            |
| IL-4            | 0.7                            |
| IL-21           | 1.4                            |
| IL-22           | 2.0                            |

74



75 **Table E7: Single Cell Sequencing Information**

|                                              | Peanut<br>CD154+ | CD3/CD28<br>CD154+ | Treg (HC)  | Treg (PA)  | total       |
|----------------------------------------------|------------------|--------------------|------------|------------|-------------|
| total cells<br>(# total<br>genes)            | 238 (23740)      | 127 (23740)        | 53 (23740) | 57 (23740) | 475 (23740) |
| #cells >5e5<br>reads<br>(#expressed<br>gene) | 212 (11889)      | 122 (11356)        | 51 (7571)  | 46 (8490)  | 431 (14055) |

76

77 **Table E8: Gene ontology biological processes annotations for state 3**

| Accession  | Term                                                                       | N     | DE  | P.DE        |
|------------|----------------------------------------------------------------------------|-------|-----|-------------|
| GO:0002637 | regulation of immunoglobulin production                                    | 41    | 6   | 5.01E-06    |
| GO:0046427 | positive regulation of JAK-STAT cascade                                    | 64    | 7   | 5.94E-06    |
| GO:0002639 | positive regulation of immunoglobulin production                           | 29    | 5   | 1.39E-05    |
| GO:0046548 | retinal rod cell development                                               | 9     | 3   | 0.000101263 |
| GO:0032601 | connective tissue growth factor production                                 | 2     | 2   | 0.000117556 |
| GO:1903659 | regulation of complement-dependent cytotoxicity                            | 2     | 2   | 0.000117556 |
| GO:1903660 | negative regulation of complement-dependent cytotoxicity                   | 2     | 2   | 0.000117556 |
| GO:0014066 | regulation of phosphatidylinositol 3-kinase signaling                      | 72    | 6   | 0.000131717 |
| GO:0046425 | regulation of JAK-STAT cascade                                             | 106   | 7   | 0.00015865  |
| GO:0042531 | positive regulation of tyrosine phosphorylation of STAT protein            | 49    | 5   | 0.000186656 |
| GO:0002377 | immunoglobulin production                                                  | 82    | 6   | 0.000269842 |
| GO:0007259 | JAK-STAT cascade                                                           | 117   | 7   | 0.000292057 |
| GO:0002700 | regulation of production of molecular mediator of immune response          | 84    | 6   | 0.000307672 |
| GO:0097278 | complement-dependent cytotoxicity                                          | 3     | 2   | 0.000350138 |
| GO:0042509 | regulation of tyrosine phosphorylation of STAT protein                     | 56    | 5   | 0.000351609 |
| GO:0002702 | positive regulation of production of molecular mediator of immune response | 56    | 5   | 0.000351609 |
| GO:0022408 | negative regulation of cell-cell adhesion                                  | 121   | 7   | 0.000358523 |
| GO:0007260 | tyrosine phosphorylation of STAT protein                                   | 61    | 5   | 0.000524117 |
| GO:0014065 | phosphatidylinositol 3-kinase signaling                                    | 95    | 6   | 0.000596074 |
| GO:0008152 | metabolic process                                                          | 11474 | 147 | 0.00060185  |

78

79

80

81 **Table E9: Gene ontology biological processes annotations for state 2**

| Accession  | Term                                                                                         | N    | DE  | P.DE     |
|------------|----------------------------------------------------------------------------------------------|------|-----|----------|
| GO:0000278 | mitotic cell cycle                                                                           | 953  | 63  | 3.78E-10 |
| GO:1903047 | mitotic cell cycle process                                                                   | 820  | 54  | 8.68E-09 |
| GO:0007049 | cell cycle                                                                                   | 1620 | 85  | 2.22E-08 |
| GO:0006259 | DNA metabolic process                                                                        | 892  | 55  | 5.89E-08 |
| GO:0007067 | mitotic nuclear division                                                                     | 387  | 32  | 7.48E-08 |
| GO:0022402 | cell cycle process                                                                           | 1208 | 67  | 1.13E-07 |
| GO:0000819 | sister chromatid segregation                                                                 | 113  | 16  | 1.29E-07 |
| GO:0000070 | mitotic sister chromatid segregation                                                         | 105  | 15  | 2.82E-07 |
| GO:0000280 | nuclear division                                                                             | 507  | 35  | 1.39E-06 |
| GO:0048285 | organelle fission                                                                            | 540  | 36  | 2.21E-06 |
| GO:0090304 | nucleic acid metabolic process                                                               | 4775 | 179 | 1.43E-05 |
| GO:0031577 | spindle checkpoint                                                                           | 53   | 9   | 1.66E-05 |
| GO:0007059 | chromosome segregation                                                                       | 238  | 20  | 1.67E-05 |
| GO:0044260 | cellular macromolecule metabolic process                                                     | 7696 | 266 | 1.81E-05 |
| GO:0002562 | somatic diversification of immune receptors via germline recombination within a single locus | 54   | 9   | 1.95E-05 |
| GO:0016444 | somatic cell DNA recombination                                                               | 54   | 9   | 1.95E-05 |
| GO:0051276 | chromosome organization                                                                      | 977  | 51  | 2.19E-05 |
| GO:0044237 | cellular metabolic process                                                                   | 9685 | 322 | 2.40E-05 |
| GO:0051301 | cell division                                                                                | 617  | 36  | 4.05E-05 |
| GO:0002200 | somatic diversification of immune receptors                                                  | 60   | 9   | 4.65E-05 |

82

83

84 **Table E10: Gene ontology biological processes annotations for state 1**

| Accession  | Term                                                   | N     | DE  | P.DE     |
|------------|--------------------------------------------------------|-------|-----|----------|
| GO:0007005 | mitochondrion organization                             | 654   | 58  | 1.10E-09 |
| GO:0008152 | metabolic process                                      | 11474 | 495 | 1.05E-07 |
| GO:0006271 | DNA strand elongation involved in DNA replication      | 32    | 10  | 1.58E-07 |
| GO:0044237 | cellular metabolic process                             | 9685  | 428 | 2.97E-07 |
| GO:0022616 | DNA strand elongation                                  | 35    | 10  | 4.05E-07 |
| GO:0044238 | primary metabolic process                              | 9586  | 423 | 5.10E-07 |
| GO:0034660 | ncRNA metabolic process                                | 407   | 37  | 6.76E-07 |
| GO:0006996 | organelle organization                                 | 3322  | 175 | 6.99E-07 |
| GO:0032201 | telomere maintenance via semi-conservative replication | 25    | 8   | 2.31E-06 |
| GO:0010833 | telomere maintenance via telomere lengthening          | 42    | 10  | 2.56E-06 |
| GO:0032543 | mitochondrial translation                              | 112   | 16  | 4.29E-06 |
| GO:0044260 | cellular macromolecule metabolic process               | 7696  | 346 | 4.74E-06 |
| GO:0071704 | organic substance metabolic process                    | 9941  | 430 | 5.13E-06 |
| GO:0006261 | DNA-dependent DNA replication                          | 116   | 16  | 6.82E-06 |
| GO:0034470 | ncRNA processing                                       | 266   | 26  | 8.56E-06 |
| GO:0006364 | rRNA processing                                        | 140   | 17  | 1.99E-05 |
| GO:1902589 | single-organism organelle organization                 | 2311  | 123 | 3.14E-05 |
| GO:0016072 | rRNA metabolic process                                 | 145   | 17  | 3.15E-05 |
| GO:0042254 | ribosome biogenesis                                    | 190   | 20  | 3.21E-05 |
| GO:0006259 | DNA metabolic process                                  | 892   | 58  | 3.22E-05 |

85

86

87 **Table E11: TCR Sequencing Overview**

88

| Cell Types      | TCRA reconstruction (%) | TCRB reconstruction (%) | Paired productive chains (%) |
|-----------------|-------------------------|-------------------------|------------------------------|
| Tregs (HC)      | 35.7                    | 53.6                    | 26.8                         |
| Tregs (PA)      | 53.8                    | 71.2                    | 36.5                         |
| CD3/CD28 CD154+ | 89.3                    | 90.1                    | 83.5                         |
| Peanut CD154+   | 78.3                    | 82.1                    | 68.9                         |

89

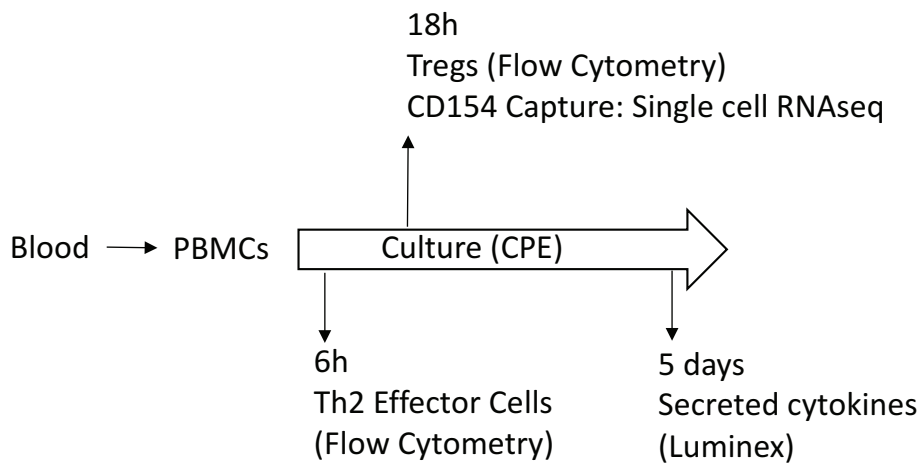

CoFAR PA/HT Cohort

- Th2 & Treg frequency
- Chemokine Receptor Expression
- Secreted cytokines

MSSM PA Cohort

- Th2 Heterogeneity, Phenotyping
- Single cell RNAseq
- Treg suppression of cytokines
- IL-2 dependence of Treg response

Figure E1

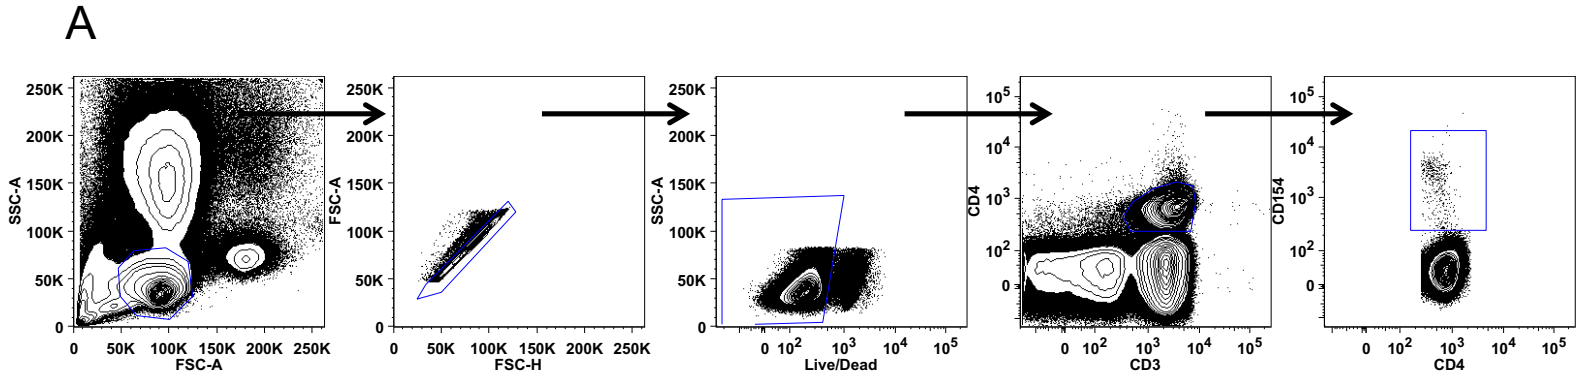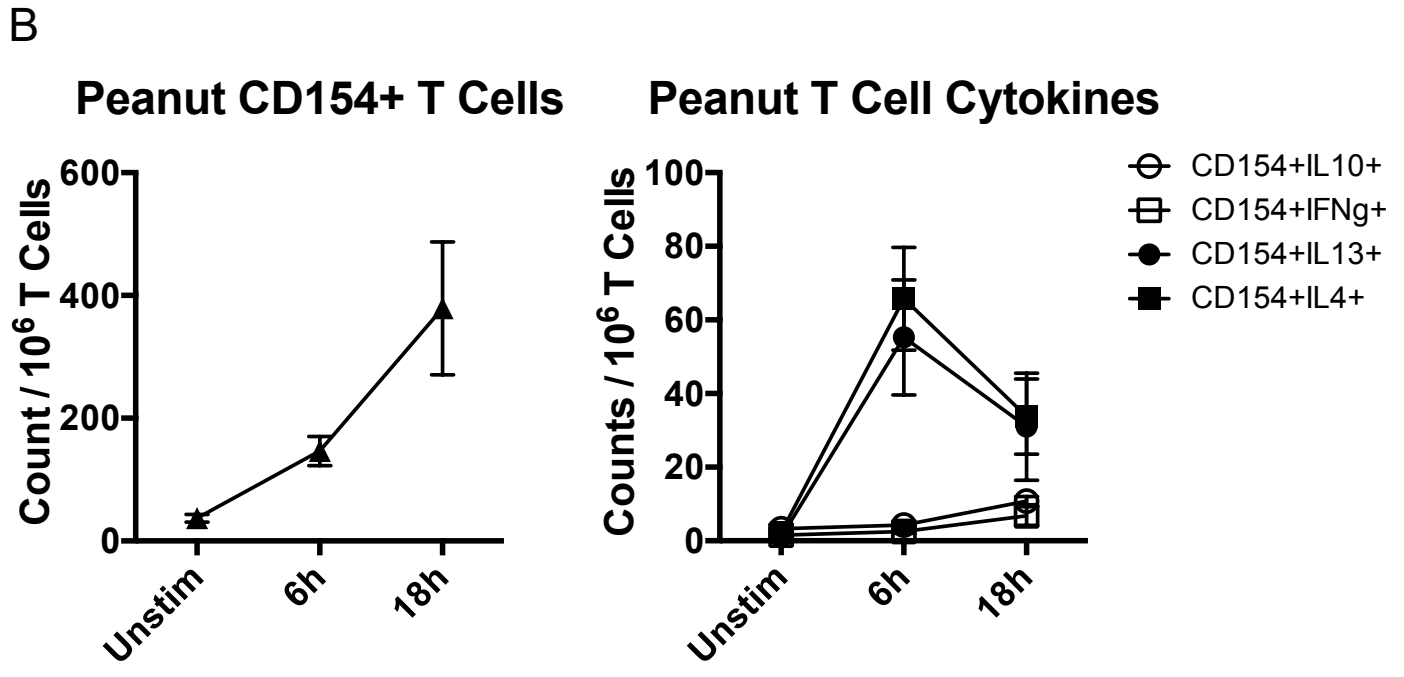

Figure E2

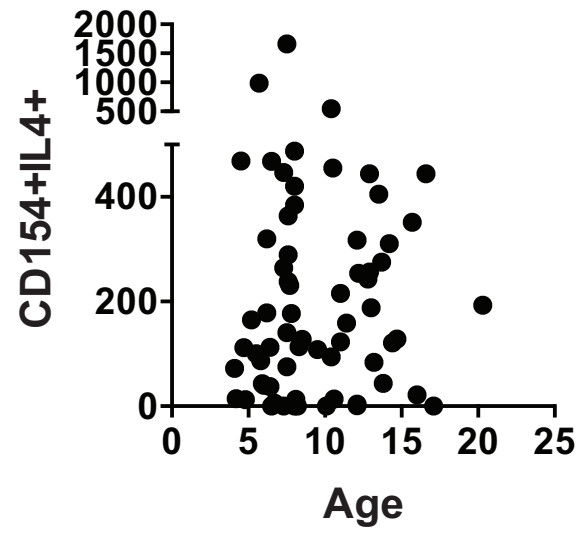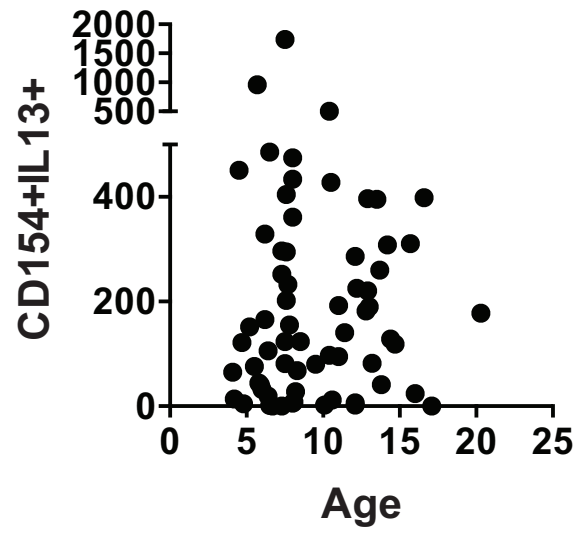

Figure E3



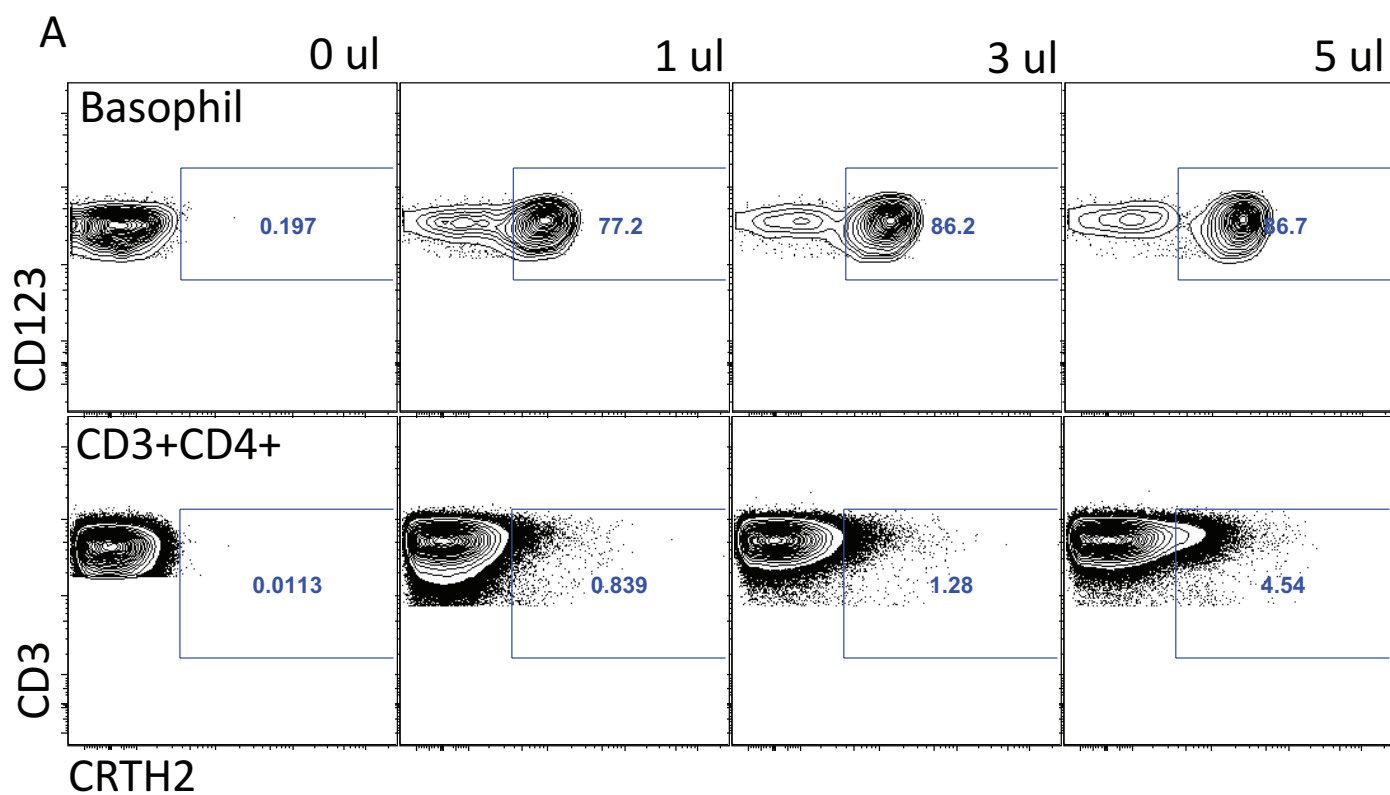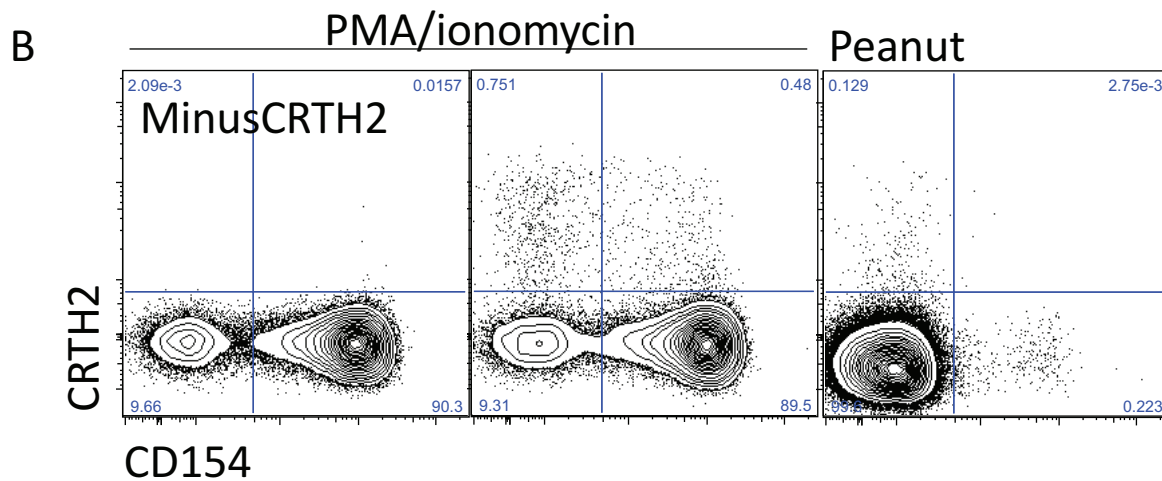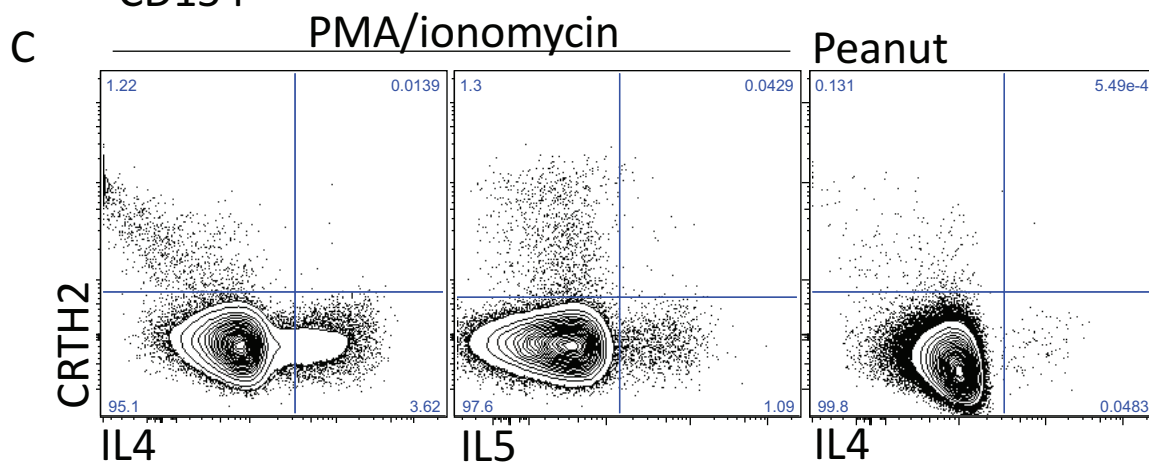

Figure E4

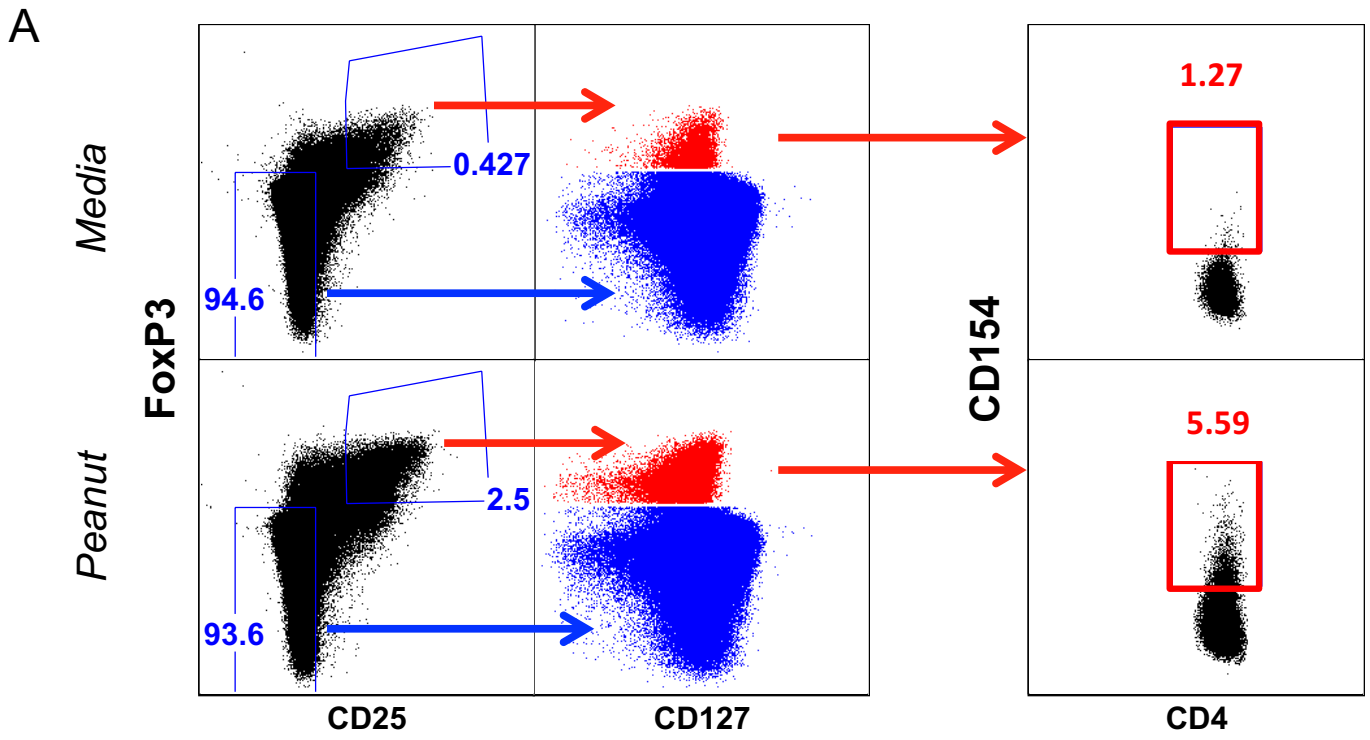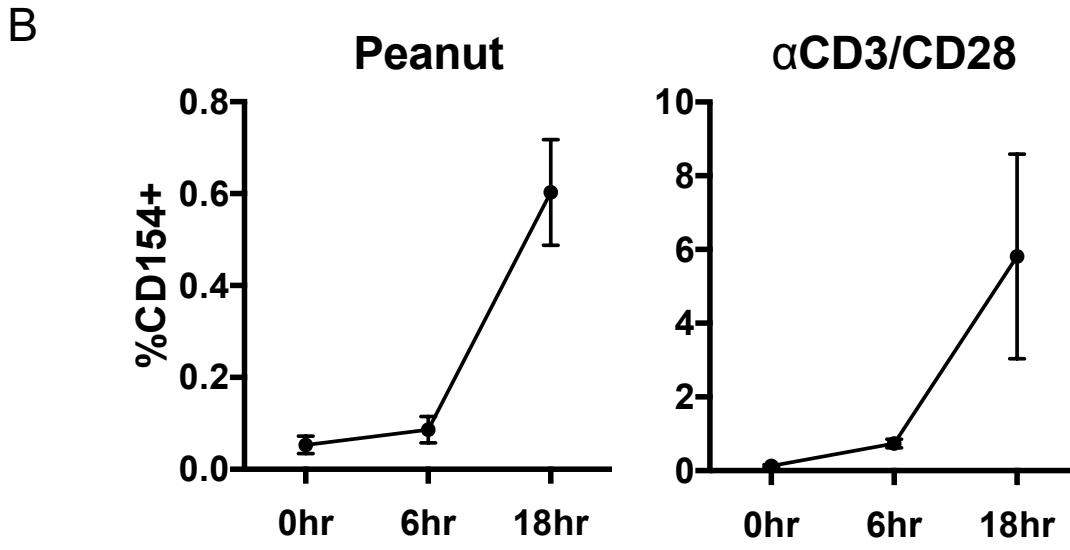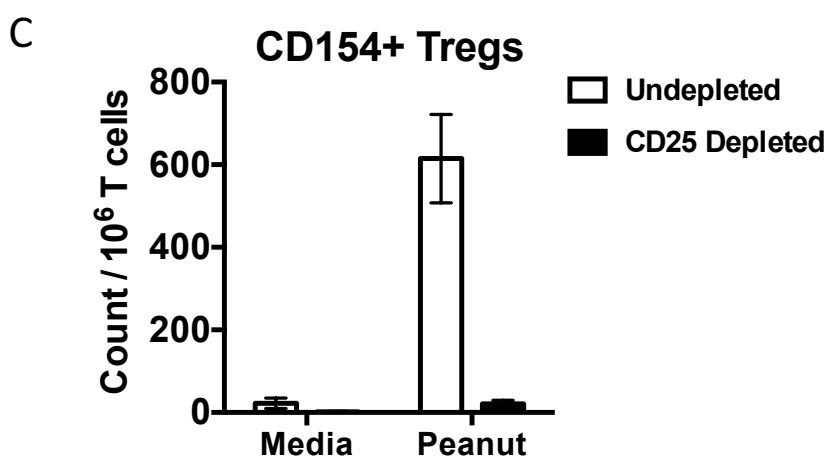

Figure E5

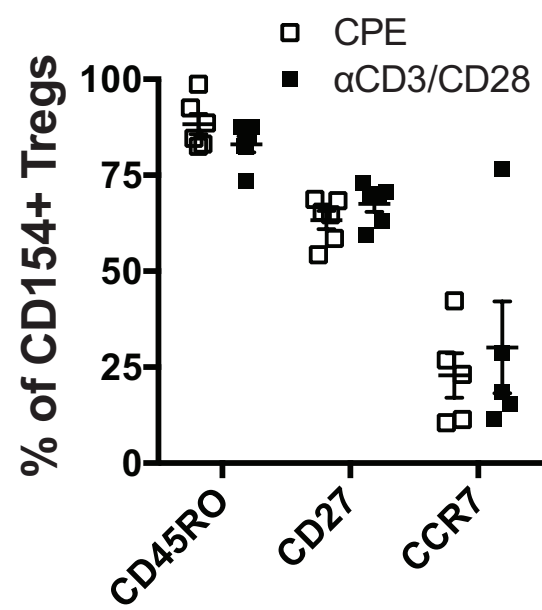

Figure E6

A

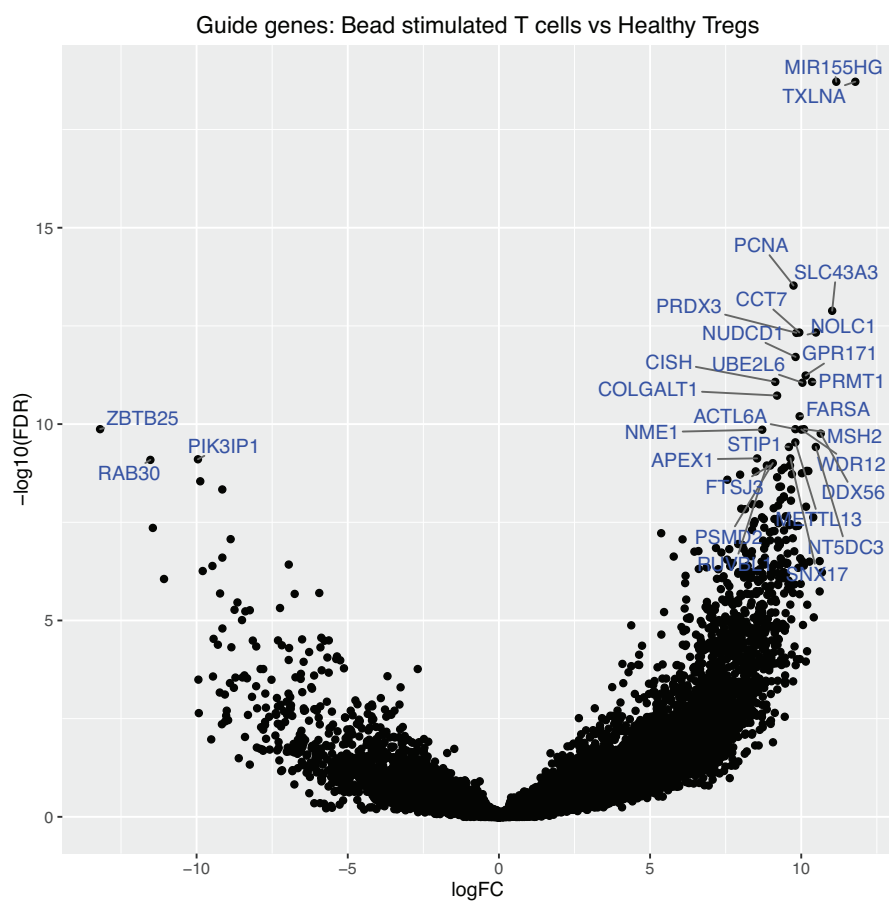

B

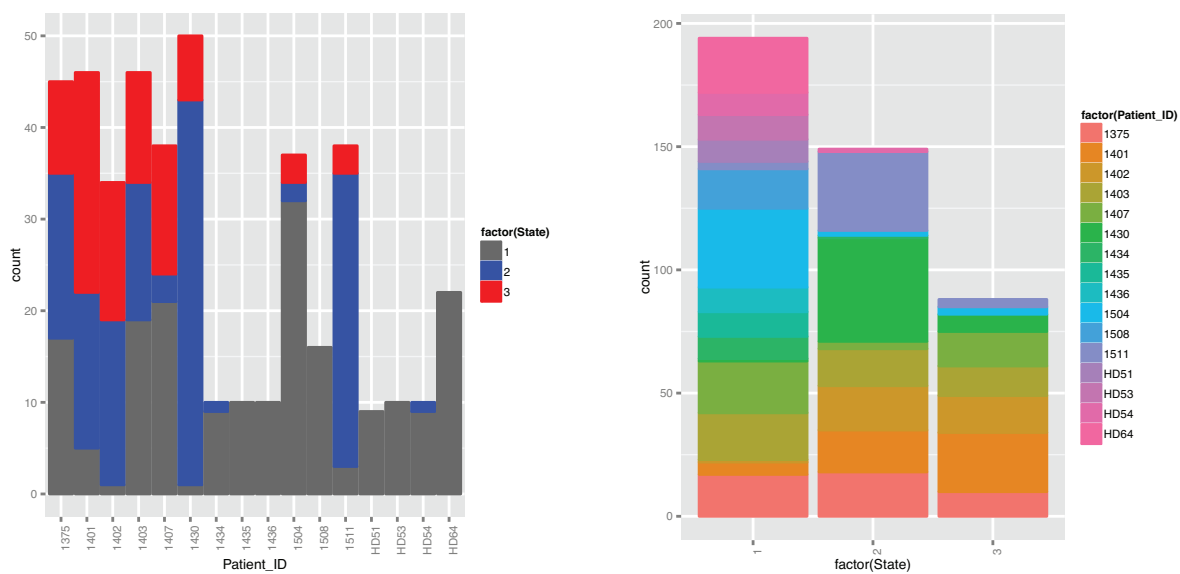

Figure E7

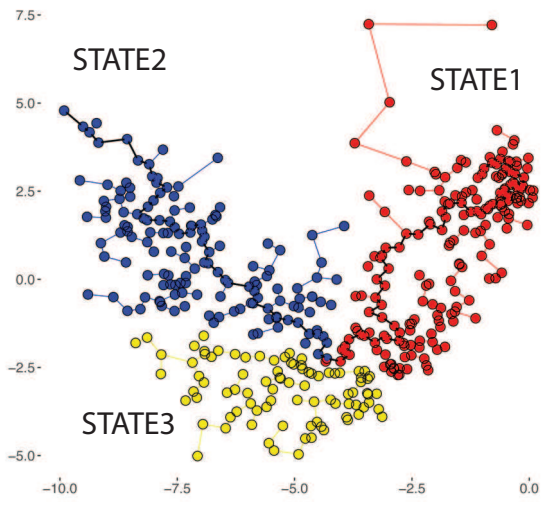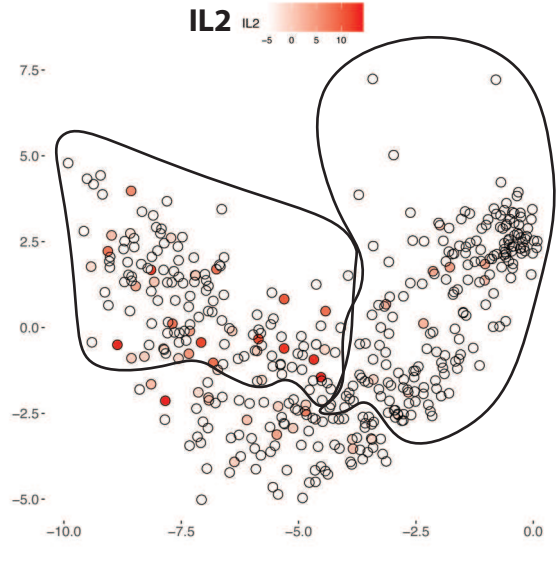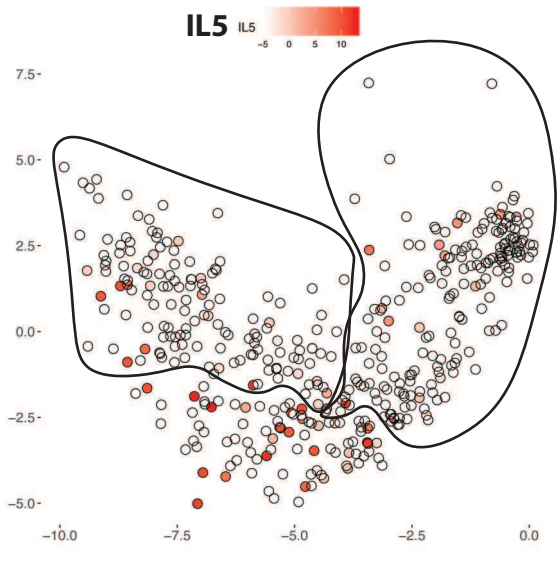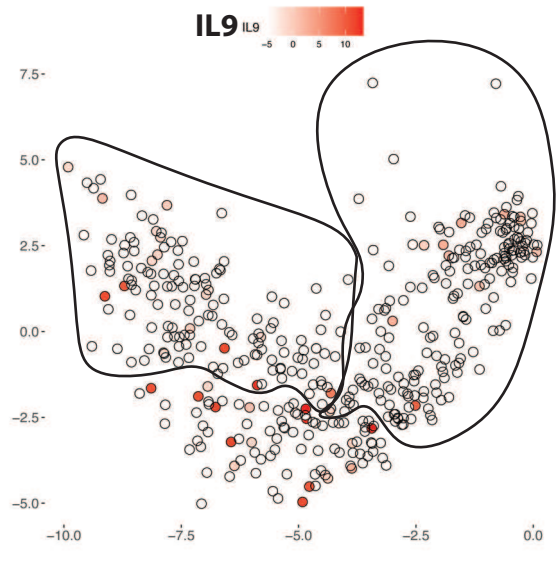

Figure E8

# Cell cycle allocation

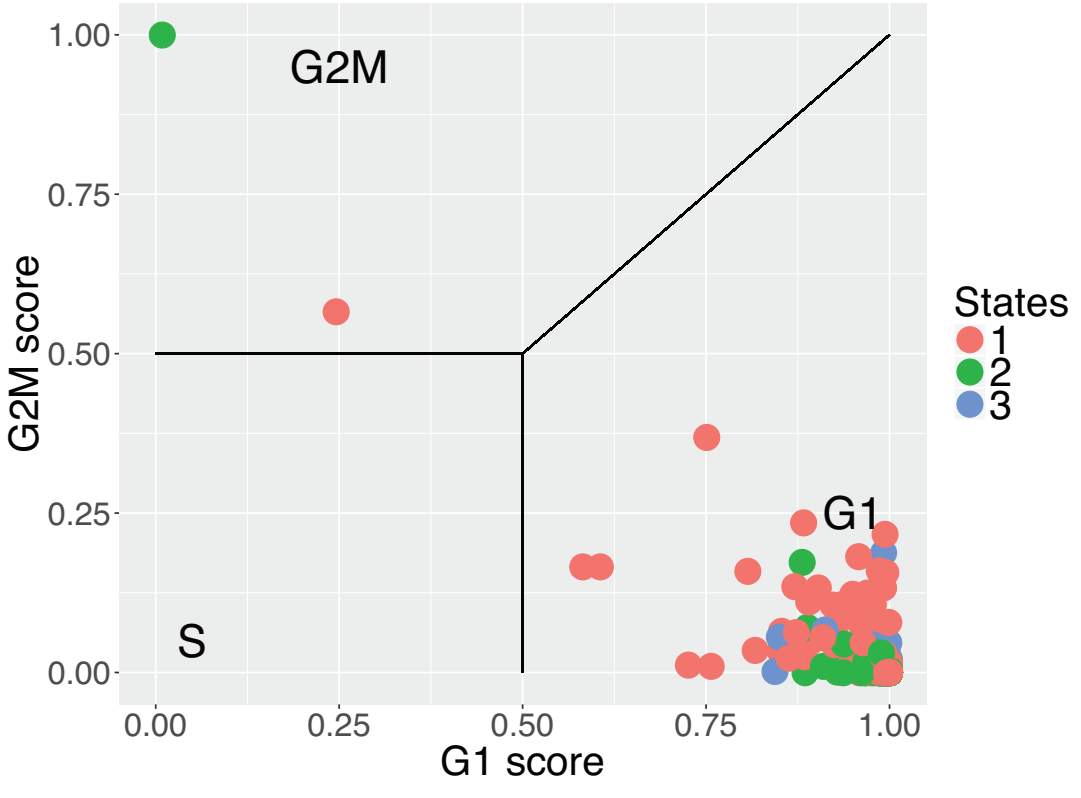

Figure E9

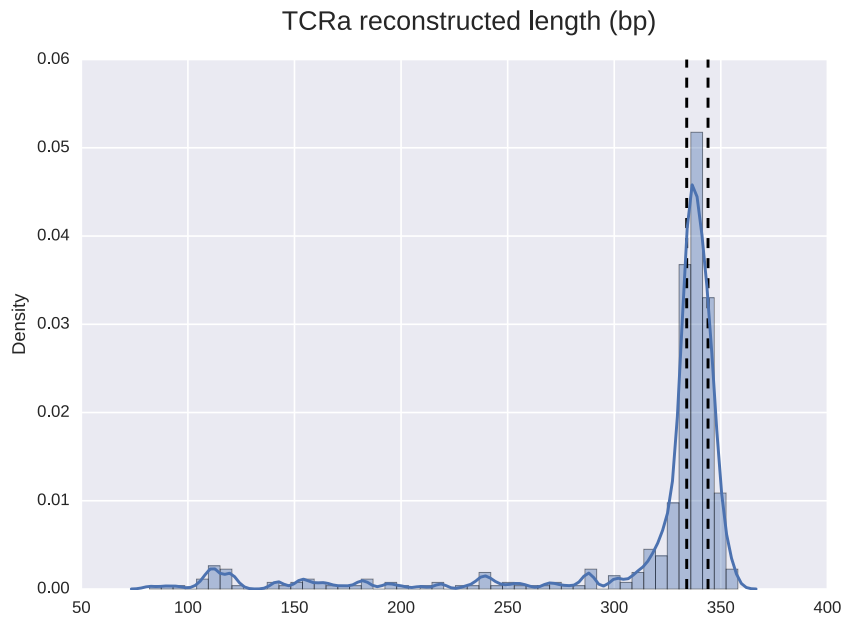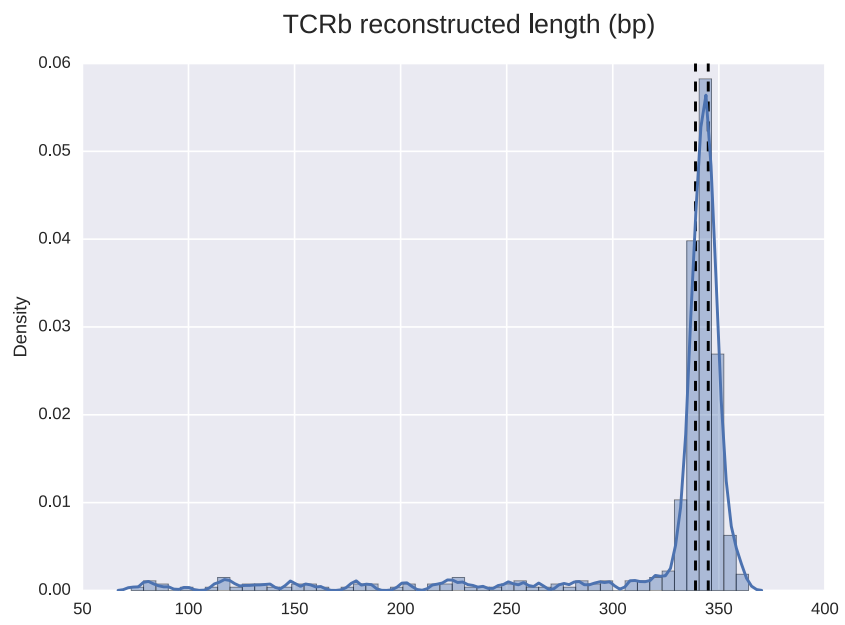

Figure E10

A

|         |                                           |
|---------|-------------------------------------------|
| Clone 1 | TRAV21_CTGTGCTACACTAT_TRAJ7               |
|         | TRBV6-2_GCAGTGCAGACCCAGGG(G)AGCAG_TRBJ2-7 |
| Clone 2 | TRAV21_TGTGACCCATTCA_TRAJ29               |
|         | TRBV6-1_AGCAGGACTTACACT_TRBJ1-1           |
| Clone 3 | TRAV8-4_CTGAGGGTACTCA_TRAJ57              |
|         | TRBV23-1_GTCAACATCCGAAGTCTCCT_TRBJ2-7     |
| Clone 4 | TRAV8-4_GTGCTGTGTCAGGGGTGGGA_TRAJ7        |
|         | TRBV6-1_CAGTGGGCAGCAGGGGATGAAC_TRBJ1-1    |

B

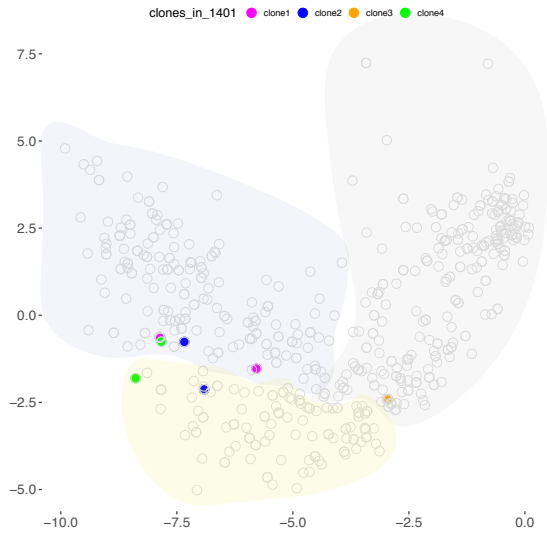

C

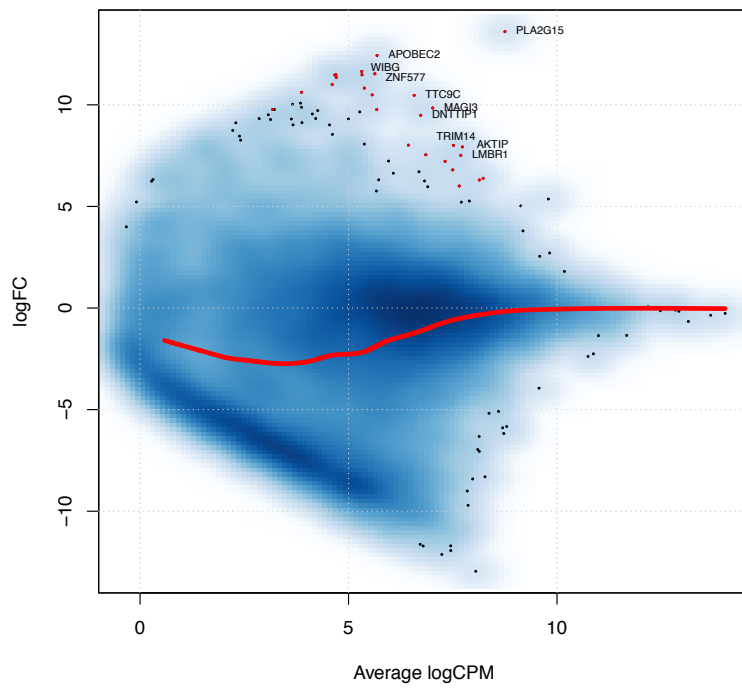

Figure E11



| State1   |         |            | State2   |        |            | State3       |        |            |
|----------|---------|------------|----------|--------|------------|--------------|--------|------------|
| Geneid   | logFC   | FDR        | Geneid   | logFC  | FDR        | Geneid       | logFC  | FDR        |
| ZNF211   | 9.595   | 4.42E-13   | PTK2     | 7.749  | 4.39E-11   | IL5          | 10.556 | 3.34E-08   |
| IL2      | -10.526 | 6.74E-12   | GEMIN4   | 8.060  | 2.57E-10   | IL9          | 11.093 | 2.53E-07   |
| C11orf65 | 6.180   | 5.09E-07   | SLC37A4  | 6.510  | 8.08E-07   | UBASH3B      | -7.271 | 6.24E-05   |
| FEN1     | -8.767  | 7.27E-07   | IL2      | 11.043 | 3.22E-06   | CD200        | -9.310 | 6.24E-05   |
| PTK2     | -7.314  | 1.30E-06   | CCL22    | 7.399  | 4.69E-06   | UBE2H        | -7.641 | 0.00011241 |
| MS4A1    | 3.491   | 4.31E-06   | NEK3     | 9.452  | 1.73E-05   | IL4          | 5.869  | 0.00011241 |
| QDPR     | -8.457  | 4.71E-06   | CTTN     | 9.736  | 1.73E-05   | TP53TG1      | -6.151 | 0.00046779 |
| CSTF1    | -9.557  | 1.08E-05   | ZNF211   | -6.497 | 3.26E-05   | SLC35D2      | 8.139  | 0.00054562 |
| PGAP2    | -9.048  | 1.10E-05   | POU2AF1  | 7.807  | 4.08E-05   | CHN1         | -6.760 | 0.00071494 |
| RTCB     | -5.889  | 1.26E-05   | AFF3     | 7.068  | 5.79E-05   | ACTR5        | 6.480  | 0.00132353 |
| MAD2L2   | -8.136  | 1.27E-05   | TRPV2    | -7.630 | 6.58E-05   | IL17RB       | 6.447  | 0.00155603 |
| COMMD4   | -8.734  | 1.30E-05   | HLA-DRB5 | -6.214 | 6.58E-05   | TMEM219      | 4.365  | 0.00161112 |
| ATP5SL   | -9.104  | 1.49E-05   | GRPEL2   | 5.684  | 6.58E-05   | FAM13A       | -5.776 | 0.00162168 |
| C2CD5    | -9.736  | 1.54E-05   | PLA2G15  | -4.457 | 0.0001077  | ZNF605       | 7.486  | 0.00180866 |
| TRPV2    | 6.168   | 2.14E-05   | DPH6     | 6.938  | 0.00012508 | IL3          | 5.387  | 0.00180866 |
| IL22     | -6.445  | 2.37E-05   | ACAD8    | -6.595 | 0.00015684 | GEMIN4       | -4.642 | 0.00227589 |
| IFT57    | -9.120  | 2.81E-05   | IL5      | -7.374 | 0.00015684 | HERC5        | 3.917  | 0.00242129 |
| CCR4     | -7.011  | 2.81E-05   | SMIM3    | 9.021  | 0.00022885 | AKAP7        | 6.153  | 0.00256786 |
| COX15    | -8.065  | 2.81E-05   | PYCR1    | 7.442  | 0.00028722 | DNAH17       | -5.853 | 0.00256786 |
| DHPS     | -6.691  | 2.98E-05   | C11orf65 | -4.526 | 0.00033061 | PTK2         | -6.143 | 0.00256786 |
| FAM210A  | -8.189  | 3.09E-05   | ZNRF3    | 7.280  | 0.00033061 | ZNF30        | 8.446  | 0.00256786 |
| MKRN2    | -9.991  | 5.04E-05   | MED18    | 8.997  | 0.00033061 | PRKAB1       | 7.307  | 0.00256786 |
| CCL22    | -5.355  | 5.04E-05   | PRNP     | -6.325 | 0.00034427 | SLFN12       | 6.061  | 0.00269399 |
| WDR45    | -6.384  | 5.42E-05   | ZWINT    | 8.618  | 0.00034427 | GMPR2        | 5.289  | 0.00271631 |
| APOBEC2  | 5.464   | 6.78E-05   | MS4A1    | -1.894 | 0.00038388 | PGAP2        | 7.128  | 0.00350167 |
| FAM13A   | 7.295   | 0.00010005 | TM9SF4   | 8.155  | 0.00038388 | MCC          | 6.098  | 0.00352265 |
| GEMIN4   | -6.275  | 0.00010433 | ZNF266   | 6.292  | 0.00040568 | TTI2         | -7.076 | 0.00352265 |
| SLC5A6   | -9.024  | 0.00011875 | IL17F    | 3.173  | 0.00042693 | VAT1         | -7.149 | 0.00352265 |
| FDPS     | -6.884  | 0.00014025 | C16orf70 | 8.041  | 0.00042693 | PLCG1-AS1    | 6.674  | 0.00352265 |
| RRM1     | -7.612  | 0.00015455 | YAE1D1   | 7.319  | 0.00043859 | IL4I1        | 6.137  | 0.0037042  |
| ATPAF2   | -8.365  | 0.00022994 | CSTF1    | 8.978  | 0.00047649 | RP9P         | 5.401  | 0.00403708 |
| ATG4A    | -7.696  | 0.00025348 | GZMA     | -8.611 | 0.00047649 | IL13         | 6.455  | 0.00403708 |
| METAP1   | -5.946  | 0.0003175  | DES12    | 4.499  | 0.00047649 | POMGNT2      | 5.478  | 0.00403708 |
| ACO2     | -8.510  | 0.00032965 | CARD6    | -8.987 | 0.0005127  | IL18RAP      | 8.561  | 0.00441691 |
| LIF      | -9.192  | 0.00033193 | KPNA2    | 3.883  | 0.00062241 | NEK3         | -6.894 | 0.00459859 |
| MED7     | -7.938  | 0.00033193 | CDC20    | 8.421  | 0.00066184 | AP4M1        | 5.572  | 0.00504648 |
| COG7     | -7.555  | 0.00033193 | CDR2L    | 7.026  | 0.00069299 | UBA7         | 4.389  | 0.00504648 |
| C12orf10 | -8.331  | 0.00033193 | FABP5    | 3.724  | 0.00084884 | FLVCR1-AS1   | 7.912  | 0.00504648 |
| CHCHD3   | -7.387  | 0.0003462  | DIEXF    | 6.302  | 0.00085321 | SCML1        | -7.694 | 0.0050844  |
| FAM216A  | -7.337  | 0.00034693 | COMMD4   | 7.755  | 0.00085862 | NTRK1        | 6.261  | 0.00511696 |
| C12orf29 | -6.842  | 0.00036502 | IL17RB   | -7.025 | 0.00085862 | DCUN1D3      | 6.475  | 0.00521199 |
| IL31     | -6.439  | 0.00037647 | DNAJC11  | 8.283  | 0.00085862 | C14orf93     | -4.920 | 0.00527402 |
| PPIL1    | -8.986  | 0.00037647 | SRXN1    | 7.673  | 0.00087886 | HPX          | 7.260  | 0.00567107 |
| CBX5     | -5.944  | 0.0003924  | SLC35D2  | -6.780 | 0.00087886 | EXO5         | 5.683  | 0.00720174 |
| TEX2     | -8.694  | 0.00039818 | ZNF33B   | -6.087 | 0.00095066 | PLA2G16      | 6.603  | 0.00720174 |
| USP45    | -7.921  | 0.00046918 | TOP2A    | 8.020  | 0.00105968 | DUSP22       | 6.690  | 0.00733844 |
| TERF2    | -7.685  | 0.00047675 | PDE4B    | -5.058 | 0.00110135 | C10orf128    | 4.753  | 0.00788299 |
| VKORC1L1 | -7.529  | 0.00052407 | FKBP7    | 7.939  | 0.00110135 | NPR2         | -6.805 | 0.00825896 |
| HMBS     | -9.035  | 0.00052679 | TIMP1    | -5.249 | 0.00111006 | HPGDS        | 6.826  | 0.00825896 |
| ACSL1    | -8.020  | 0.0005914  | PQLC3    | -7.234 | 0.00116143 | ZHX1-C8orf76 | 4.652  | 0.00876244 |
| FBXL4    | -6.739  | 0.00060006 | HMGB3    | 5.770  | 0.00116143 | PARP15       | 7.039  | 0.00906829 |
| MRS2     | -8.954  | 0.00061888 | CD200    | 7.240  | 0.00131387 | PLAUR        | 6.887  | 0.00913322 |

|             |        |            |             |        |            |             |        |            |
|-------------|--------|------------|-------------|--------|------------|-------------|--------|------------|
| ALDH16A1    | -7.696 | 0.00065288 | OC10050571! | -5.859 | 0.00166445 | WHSC1       | 5.999  | 0.00914651 |
| MRPS9       | -5.872 | 0.00068123 | LINC00674   | -5.186 | 0.00169578 | CCDC66      | -5.676 | 0.00934173 |
| GSS         | -9.396 | 0.00073712 | C5orf30     | 6.569  | 0.00169578 | MFSD5       | 6.669  | 0.00934173 |
| ZNF605      | -7.385 | 0.00073712 | ZNF671      | -7.944 | 0.00181505 | PLAG1       | -2.585 | 0.00940219 |
| NPR2        | 8.708  | 0.00073712 | ZNF30       | -6.285 | 0.0018359  | SLC37A4     | -4.141 | 0.00940219 |
| PRMT3       | -8.404 | 0.00073712 | CASC5       | 7.230  | 0.0018359  | ZNF211      | -3.106 | 0.00940219 |
| AKAP7       | -6.104 | 0.00077632 | VIPAS39     | 7.582  | 0.00191003 | PRMT6       | -6.652 | 0.01090781 |
| EIF2S1      | -4.008 | 0.00077932 | PLAUR       | -6.892 | 0.00199608 | OC10192777! | 6.192  | 0.01206211 |
| OC10050571! | 7.444  | 0.0007932  | GATB        | 7.356  | 0.00199608 | ATG2B       | -6.061 | 0.01206211 |
| PLD6        | -8.247 | 0.00080953 | CD274       | -6.563 | 0.00199848 | LINC00880   | 5.848  | 0.01206211 |
| SFXN4       | -4.733 | 0.00081605 | ATG2B       | 6.545  | 0.002135   | NAPB        | 8.398  | 0.01326128 |
| RCC2        | -6.315 | 0.00081833 | BEND3       | 7.624  | 0.002135   | HGSNAT      | 6.521  | 0.01382406 |
| TANGO6      | -7.208 | 0.00087699 | CYB5D2      | 7.611  | 0.00214471 | ZNF649      | -7.048 | 0.01382406 |
| GRPEL2      | -6.604 | 0.00087699 | DIS3L       | 4.823  | 0.00214471 | SMIM3       | -5.475 | 0.01419903 |
| AVL9        | -8.379 | 0.00087953 | SPRY1       | 7.213  | 0.00214471 | MAGEE1      | 7.054  | 0.01434537 |
| NUP93       | -6.522 | 0.00089582 | C18orf54    | 7.475  | 0.00217688 | CCDC141     | 6.391  | 0.0146985  |
| KPNA2       | -4.059 | 0.00091588 | SAMD3       | -6.773 | 0.00230177 | TAF2        | 3.295  | 0.0146985  |
| C10orf35    | -4.810 | 0.00096363 | FAM69B      | 6.119  | 0.00232475 | SHISA2      | -2.043 | 0.0146985  |
| TMPRSS3     | -7.176 | 0.00096363 | SETD1A      | 5.817  | 0.00254341 | PEX1        | 5.693  | 0.01471658 |
| FAF2        | -6.807 | 0.00099602 | PP7080      | 6.828  | 0.00255956 | TEF         | 5.707  | 0.01494407 |
| METTL17     | -6.949 | 0.00099602 | KFZP5861142 | -3.306 | 0.00255956 | TRPS1       | -6.510 | 0.01536597 |
| PRPSAP1     | -8.518 | 0.0010058  | WDR7        | 3.808  | 0.00255956 | LPCAT4      | 5.197  | 0.01536597 |
| TFB2M       | -8.694 | 0.0010058  | EIF2B4      | 5.629  | 0.00255956 | PQLC3       | 5.728  | 0.01643165 |
| DCTN5       | -7.237 | 0.001018   | ERCC6-PGBD3 | 8.447  | 0.00255956 | PECAM1      | -2.403 | 0.01643165 |
| C5orf51     | -6.540 | 0.001018   | IL23R       | -5.558 | 0.00262707 | VPS33B      | 5.760  | 0.01658009 |
| FAM83D      | 6.074  | 0.00103752 | RRP9        | 7.376  | 0.00298852 | GEN1        | -5.197 | 0.01748316 |
| APH1B       | 6.891  | 0.00104474 | OASL        | -7.737 | 0.00299554 | CYB561D1    | 7.330  | 0.01748316 |
| KBTBD4      | -6.873 | 0.00105612 | UBASH3B     | 4.883  | 0.00299554 | CSF2        | 3.320  | 0.01841714 |
| SLC25A44    | -5.928 | 0.00106952 | BCL7A       | 5.325  | 0.0030349  | RSBN1       | 4.921  | 0.01914205 |
| ZWILCH      | -8.544 | 0.00113032 | FANCB       | 7.637  | 0.0030349  | POU2AF1     | -4.914 | 0.01914205 |
| PECAM1      | 2.461  | 0.00113032 | AK9         | -7.551 | 0.0030349  | OC10013398! | 4.173  | 0.01914205 |
| FAHD2A      | -6.032 | 0.00119386 | CD40        | 3.901  | 0.0030349  | FAM186B     | 4.595  | 0.01914205 |
| ZSWIM6      | 7.502  | 0.00132771 | PDXDC2P     | -4.336 | 0.0030349  | SNORD14A    | 5.884  | 0.01914205 |
| ZFYVE16     | -6.701 | 0.00133795 | CCNB1       | 8.463  | 0.0030349  | BBS4        | -7.108 | 0.01914205 |
| GPN3        | -7.325 | 0.00133795 | MPP7        | 5.694  | 0.0030349  | ZNF700      | -6.008 | 0.01914205 |
| ZNF200      | 6.964  | 0.00134468 | HGH1        | 8.889  | 0.0030349  | NTRK2       | 7.666  | 0.01952315 |
| CTTN        | -6.584 | 0.00136545 | KCTD21      | 6.861  | 0.00342047 | SERPINE2    | -5.669 | 0.02030913 |
| GNL2        | -5.542 | 0.00136545 | BZRAP1-AS1  | -6.580 | 0.00342294 | ALPK1       | -4.262 | 0.02030913 |
| FABP5       | -4.058 | 0.00136545 | CENPN       | 8.210  | 0.00342294 | CHST11      | 5.097  | 0.02083486 |
| C12orf45    | -7.577 | 0.00142074 | HDDC3       | 7.864  | 0.00351835 | MAP4K2      | 5.168  | 0.02113038 |
| DHX33       | -7.554 | 0.00158465 | SMC2        | 4.276  | 0.00364881 | LIN54       | -5.717 | 0.02117527 |
| PRMT5       | -6.686 | 0.00165434 | AKAP1       | 6.205  | 0.00364881 | PHLDB2      | -4.262 | 0.02183582 |
| SCML2       | -7.220 | 0.00165434 | LAYN        | 7.178  | 0.0036602  | SMAGP       | -3.817 | 0.0223068  |
| IPO5        | -4.249 | 0.00171191 | RNF125      | -5.421 | 0.0036602  | KLHDC2      | 4.294  | 0.0223068  |
| CCDC51      | -7.418 | 0.00172546 | BCAT1       | 8.726  | 0.0036602  | TNFRSF11A   | 6.675  | 0.0223068  |
| NDUFAF5     | -7.033 | 0.00186341 | AGPAT5      | 5.383  | 0.0036602  | DIS3L       | -3.500 | 0.0223068  |
| DARS2       | -5.682 | 0.0018976  | KBTBD7      | 2.647  | 0.0036602  | TUFT1       | 5.253  | 0.0223068  |
| ALG6        | -7.937 | 0.0018976  | ZNF709      | 5.986  | 0.0036602  | PPP1R16B    | 4.322  | 0.02283594 |
| CARD6       | 7.541  | 0.0018976  | POFUT2      | 8.279  | 0.0036602  | CASC5       | -2.975 | 0.02283594 |
| KCNN4       | -8.020 | 0.00193927 | NDC80       | 7.443  | 0.0036602  | C11orf63    | -4.862 | 0.02354061 |
| CCDC50      | 6.176  | 0.00199458 | 03-Mar      | 6.178  | 0.0036602  | ZNF91       | 4.005  | 0.02354061 |
| UBA7        | -4.797 | 0.00199458 | LPIN1       | -5.397 | 0.0036602  | CCDC85C     | -5.076 | 0.02354061 |
| SF3A3       | -4.593 | 0.00199458 | DLGAP1-AS1  | -6.775 | 0.0036602  | ENO1-AS1    | 4.793  | 0.02354061 |
| DDX56       | -5.702 | 0.0021201  | FBXL4       | 6.513  | 0.0036602  | SLC5A5      | -4.154 | 0.02361103 |

|           |        |            |           |        |            |            |        |            |
|-----------|--------|------------|-----------|--------|------------|------------|--------|------------|
| MEGF9     | -7.336 | 0.0021201  | FAM111B   | 7.879  | 0.00369874 | ZNF565     | 3.559  | 0.024161   |
| LINC00926 | 6.445  | 0.0021201  | DENND3    | -6.851 | 0.00370911 | IL31       | 6.375  | 0.024161   |
| MS4A6A    | 2.465  | 0.00223559 | CLCF1     | 6.935  | 0.00370911 | GSTA4      | 4.843  | 0.024161   |
| HGH1      | -6.231 | 0.00226615 | IQCK      | 6.036  | 0.00376999 | IL17RE     | 5.355  | 0.024161   |
| TPD52     | -7.261 | 0.00231823 | NOL6      | 7.072  | 0.00381489 | ZNF266     | -4.620 | 0.02441245 |
| GGPS1     | -7.096 | 0.00241345 | CENPF     | 7.455  | 0.00395534 | ATP5SL     | 5.324  | 0.02445737 |
| APOOL     | -6.728 | 0.00241345 | RAD51AP1  | 5.666  | 0.00395534 | N6AMT1     | -3.925 | 0.02453418 |
| ATG13     | -7.499 | 0.00241345 | ZNF827    | 8.691  | 0.00403904 | C18orf54   | -3.593 | 0.02470517 |
| TIMM17A   | -4.598 | 0.00247363 | ZBED5-AS1 | -5.918 | 0.0041091  | CERKL      | 5.194  | 0.02470517 |
| DPH6      | -6.030 | 0.00247596 | USP3-AS1  | 8.316  | 0.0041091  | ACAD10     | 5.868  | 0.02482912 |
| AP5M1     | -7.181 | 0.00248587 | GPR34     | -4.023 | 0.0041091  | AFF3       | -4.388 | 0.02551852 |
| ERP27     | 5.453  | 0.002597   | ZNF184    | 5.492  | 0.00428295 | CLIC5      | 5.889  | 0.02586629 |
| MRRF      | -8.286 | 0.002597   | PEX1      | -5.600 | 0.00434597 | CAPN2      | 4.799  | 0.02632037 |
| B4GALT3   | -5.031 | 0.002597   | RNF19B    | -6.705 | 0.00444779 | PACSIN2    | 5.271  | 0.02708032 |
| EIF4EBP1  | -6.170 | 0.002597   | TPST1     | 6.788  | 0.00453173 | BBS10      | 4.883  | 0.02731782 |
| RRN3P1    | -6.089 | 0.002597   | ORC1      | 6.125  | 0.00463159 | EAF2       | 6.656  | 0.02761007 |
| DCLRE1A   | -7.746 | 0.00261119 | AHNAK     | -6.181 | 0.00463159 | TMEM55A    | 6.035  | 0.02765808 |
| BCAT1     | -8.072 | 0.00261119 | TNFRSF9   | 3.572  | 0.00472483 | FAM184A    | -4.377 | 0.02805926 |
| ALS2CR12  | 7.320  | 0.00262608 | MORN2     | 5.886  | 0.00473553 | CENPW      | -4.570 | 0.02805926 |
| STX11     | -7.186 | 0.00263784 | SLC2A8    | 6.038  | 0.00473935 | ZNF140     | -5.436 | 0.02805926 |
| PNMA1     | -7.610 | 0.00267591 | ZNF670    | 7.095  | 0.00473935 | CAMK2N1    | 6.420  | 0.02807093 |
| CTCF      | -4.544 | 0.00267591 | AKR1B1    | 3.714  | 0.00473935 | CCDC87     | 3.182  | 0.02807093 |
| N6AMT2    | -7.373 | 0.00267876 | ZNF431    | -6.576 | 0.0050239  | PLRG1      | -3.894 | 0.02822873 |
| LETMD1    | -6.754 | 0.00270124 | MKRN2     | 8.471  | 0.0050239  | PYCR1      | -6.567 | 0.02822873 |
| AGAP6     | -6.855 | 0.00271845 | MBTPS2    | 7.494  | 0.00525391 | MMP25      | 6.895  | 0.02822873 |
| ARL1      | -5.271 | 0.00271845 | SAMD9L    | -5.532 | 0.0052653  | PRPSAP1    | 6.584  | 0.02822873 |
| MAD2L1    | -8.320 | 0.00271845 | TMEM53    | 5.273  | 0.00531481 | ZSCAN18    | -4.963 | 0.02822873 |
| GMPR2     | -5.393 | 0.00273438 | IFT74     | 6.905  | 0.00535313 | DIEXF      | -5.670 | 0.02828307 |
| CENPN     | -7.469 | 0.00280236 | ARMC6     | 7.070  | 0.00558784 | ABCA3      | 5.339  | 0.02828307 |
| OSBPL7    | -7.074 | 0.00298319 | PCBD2     | -7.052 | 0.00558784 | UBXN11     | 5.690  | 0.02992267 |
| GPAA1     | -5.740 | 0.00304108 | FGFRL1    | 6.384  | 0.00558784 | SERPINI1   | 6.508  | 0.03037656 |
| POLD2     | -4.925 | 0.00305568 | LTN1      | 4.834  | 0.00558784 | APOBEC2    | -3.575 | 0.03044075 |
| APEX2     | -6.198 | 0.00305568 | SNORA23   | 4.926  | 0.00558784 | SRXN1      | -5.871 | 0.03044267 |
| PELI2     | 2.349  | 0.00305568 | CSRP2BP   | 6.555  | 0.00567816 | OC10192725 | -2.553 | 0.03082953 |
| LOC284023 | -6.023 | 0.00319355 | LMCD1     | 6.757  | 0.00605796 | ZC3H12C    | 4.620  | 0.03162172 |
| BIVM      | -5.946 | 0.00322782 | YJEFN3    | 5.252  | 0.00657006 | SNORA31    | 3.551  | 0.03162172 |
| SNORD12C  | -7.337 | 0.00342209 | MCM2      | 6.807  | 0.00657006 | GDAP1      | -4.288 | 0.03162172 |
| CWC27     | -6.262 | 0.00356301 | L2HGDH    | 5.351  | 0.00657006 | TEX2       | 6.915  | 0.03162172 |
| HSD17B12  | -6.611 | 0.00356301 | SLC19A2   | 5.257  | 0.0067675  | METTL18    | -7.186 | 0.03295596 |
| CLCC1     | 6.754  | 0.00368018 | PRKAB2    | -4.497 | 0.00680667 | FKBP7      | -4.588 | 0.03295596 |
| SLC29A1   | -4.901 | 0.00368018 | ZNF14     | -4.279 | 0.00685994 | SNX10      | 4.584  | 0.03295596 |
| GIMAP2    | 6.419  | 0.00380878 | SNORA2B   | 5.186  | 0.00707456 | SH3TC1     | 4.657  | 0.03295596 |
| CCNB1     | -7.189 | 0.00396489 | IL3       | -5.873 | 0.00724929 | LIMS2      | -6.078 | 0.03405512 |
| YARS2     | -7.212 | 0.00396489 | ATPAF2    | 6.804  | 0.00740617 | ZKSCAN5    | 5.456  | 0.03405512 |
| ZNF791    | -7.172 | 0.00410129 | TRAM2-AS1 | 6.310  | 0.00742182 | RFX5       | 3.825  | 0.03405512 |
| CHAC2     | -7.734 | 0.00410129 | MOB1B     | 8.632  | 0.00785847 | GCC1       | 5.437  | 0.03453761 |
| GBP5      | 3.435  | 0.00410129 | TMEM121   | 3.732  | 0.00785847 | CSRNP2     | -5.577 | 0.03453761 |
| GTF3C3    | -5.800 | 0.00410129 | IPP       | 6.415  | 0.00785847 | GRAP       | 5.322  | 0.03476837 |
| BACE1     | -7.227 | 0.00410129 | FAM216A   | 7.666  | 0.008149   | IL10       | 5.904  | 0.03505052 |
| VPRBP     | -7.336 | 0.00410849 | ETV7      | -5.424 | 0.00841139 | ZNRF3      | -5.409 | 0.03505052 |
| QRSL1     | -6.885 | 0.00410849 | FAM175A   | -3.698 | 0.00884184 | OC10050613 | 4.029  | 0.0354768  |
| HMGB3     | -4.410 | 0.00413624 | WASL      | -6.394 | 0.00906845 | VTRNA2-1   | 3.054  | 0.03563804 |
| LXN       | -6.858 | 0.00417968 | CD96      | -3.464 | 0.00918626 | FBXW8      | -6.265 | 0.03601153 |
| PPIE      | -5.495 | 0.00421368 | MELK      | 6.774  | 0.0092593  | FAM83D     | -3.509 | 0.03609048 |

|             |        |            |            |        |            |             |        |            |
|-------------|--------|------------|------------|--------|------------|-------------|--------|------------|
| CYBB        | 5.202  | 0.00439794 | TMEM185A   | 5.416  | 0.00945613 | KIAA1429    | 2.975  | 0.03690551 |
| ZNF253      | 7.258  | 0.00439794 | HERC5      | -1.869 | 0.00994285 | FDXR        | 3.488  | 0.03704351 |
| SMC2        | -5.230 | 0.00440533 | MMAB       | 4.224  | 0.00994285 | TBC1D13     | -3.387 | 0.03764644 |
| EXT2        | -4.622 | 0.00440533 | CCNG2      | -5.049 | 0.0100083  | PPP4R1L     | 4.853  | 0.03764644 |
| GAS7        | 2.712  | 0.00440533 | CERKL      | -4.519 | 0.0100083  | ERCC6-PGBD3 | -2.293 | 0.03764644 |
| DUOX1       | 4.819  | 0.00440533 | ZNF582-AS1 | 7.413  | 0.01017447 | ZNF696      | 4.045  | 0.03764644 |
| NUPL2       | -7.168 | 0.00440533 | GCSAM      | -5.539 | 0.01017447 | LIMD1       | 5.024  | 0.0376499  |
| AP4M1       | -4.362 | 0.00443755 | TTI2       | 4.199  | 0.01029249 | FLT1        | -3.430 | 0.0376499  |
| NOP56       | -3.469 | 0.00452407 | ZKSCAN2    | 3.217  | 0.01029249 | BCL7A       | -3.210 | 0.03833424 |
| ACAD8       | 4.764  | 0.0046631  | SAMD9      | -4.995 | 0.01029249 | KHK         | 3.820  | 0.03891444 |
| WDR7        | -4.160 | 0.00470716 | GIMAP2     | -5.503 | 0.01031915 | BAP1        | -5.591 | 0.03991049 |
| WRB         | -6.035 | 0.0048174  | CORO2A     | -5.617 | 0.01042864 | NREP        | -2.494 | 0.04014076 |
| ZBTB34      | -6.050 | 0.00493831 | TUFT1      | -3.576 | 0.01058134 | MKRN2OS     | -3.459 | 0.04039858 |
| TBCE        | -6.389 | 0.00493831 | ERLIN1     | 7.603  | 0.01111746 | PACS2       | 5.396  | 0.04039858 |
| POMGNT1     | -7.266 | 0.00497178 | MANEA      | 6.674  | 0.01111746 | RLN1        | 3.417  | 0.04039858 |
| ZWINT       | -7.442 | 0.00505925 | PRMT3      | 5.631  | 0.01121616 | SNORA2B     | -4.091 | 0.04039858 |
| TP53INP1    | 6.860  | 0.00506847 | NKX3-1     | 6.918  | 0.0112612  | MAP1A       | -1.832 | 0.04049121 |
| SNHG4       | -6.870 | 0.0051617  | ZNF468     | 6.744  | 0.01126474 | ZFYVE28     | 5.214  | 0.04061656 |
| TOP3B       | -6.754 | 0.0051617  | RNF26      | 6.626  | 0.01126474 | CDR2L       | -3.848 | 0.0406588  |
| ASPH        | -8.075 | 0.0051617  | SYNE1      | -4.139 | 0.01126474 | RFFL        | 6.621  | 0.0411493  |
| MTAP        | -7.622 | 0.00526234 | SFXN4      | 4.769  | 0.01126474 | GPKOW       | -4.283 | 0.0411493  |
| TNFRSF9     | -3.184 | 0.00533494 | IL18RAP    | -6.184 | 0.01126474 | MBOAT2      | 4.678  | 0.0411493  |
| PROZ        | 4.402  | 0.0055699  | ZNF649     | 7.648  | 0.01126474 | HS1BP3      | 6.283  | 0.0411493  |
| ATG10       | -5.911 | 0.0056101  | CBX5       | 3.980  | 0.01132763 | C11orf65    | -3.007 | 0.0411493  |
| TMEM44-AS1  | -7.185 | 0.00573321 | PBX3       | 5.297  | 0.01132763 | UBR2        | -3.539 | 0.0411493  |
| PHLPP2      | -6.699 | 0.00583985 | SPDL1      | 8.005  | 0.01138417 | TTC39B      | -4.610 | 0.0411493  |
| SNORA28     | 6.418  | 0.00583985 | CCR5       | -6.312 | 0.01138417 | KLF4        | 4.076  | 0.04115343 |
| TTC39B      | 5.561  | 0.00583985 | UBXN11     | -5.353 | 0.01138417 | 03-Mar      | -2.715 | 0.04154229 |
| BPGM        | -8.028 | 0.00583985 | CCNB2      | 4.959  | 0.01138417 | CPM         | -2.424 | 0.04154229 |
| ZBED2       | -7.024 | 0.0058901  | APOBEC2    | -3.017 | 0.01138417 | NLRX1       | -3.363 | 0.04154788 |
| ZNF26       | -7.301 | 0.00598973 | C2CD5      | 7.605  | 0.01142976 | ZNF32       | 5.248  | 0.04225779 |
| ABCB1       | 6.562  | 0.00601514 | CEP97      | 7.296  | 0.01142976 | C4orf26     | 5.515  | 0.04225779 |
| CNP         | -4.343 | 0.00601514 | TMEM44-AS1 | 7.223  | 0.01142976 | L3HYPDH     | -3.815 | 0.04245403 |
| TGFBRAP1    | -6.907 | 0.00602947 | CYBRD1     | 7.404  | 0.01142976 | ING2        | -4.434 | 0.04411471 |
| KIAA1429    | -4.152 | 0.00624776 | PTGFRN     | 8.279  | 0.011541   | LINC00641   | -4.910 | 0.04411471 |
| HSD17B11    | -7.042 | 0.00626866 | ERCC6      | -3.750 | 0.0117138  | MED18       | -4.752 | 0.04411471 |
| C4orf33     | -7.337 | 0.00633249 | NCR3LG1    | 4.373  | 0.01183837 | NT5DC3      | -5.851 | 0.04472977 |
| ZNF354A     | -7.010 | 0.00633249 | SERPINB6   | 5.708  | 0.01183837 | C6orf229    | 5.442  | 0.04472977 |
| IDH3A       | -4.279 | 0.00635377 | UNC119     | -6.433 | 0.0119313  | FBXO6       | 4.970  | 0.04472977 |
| DERA        | -6.625 | 0.00635916 | SCARNA12   | 4.803  | 0.01200764 | LRRC32      | 5.925  | 0.04501015 |
| OC10050699I | 6.038  | 0.00641303 | SNORD14A   | -5.506 | 0.01200764 | DTD2        | 5.408  | 0.04501015 |
| OSBPL8      | 2.890  | 0.00644968 | KIAA2013   | 6.326  | 0.01203668 | ZNF646      | -3.727 | 0.04501015 |
| RHBDD1      | -8.664 | 0.00651395 | GINS2      | 6.931  | 0.012138   | LCORL       | -3.336 | 0.04511137 |
| AGPAT5      | -5.501 | 0.00662422 | MAN1A2     | -5.395 | 0.012138   | FAM219B     | -4.468 | 0.04511137 |
| LOC389765   | 4.799  | 0.00675224 | ARG2       | 7.385  | 0.0125568  | SLC11A2     | -3.150 | 0.04511137 |
| WHSC1       | -5.605 | 0.00675238 | TMED6      | 4.264  | 0.0125568  | PIGF        | 5.327  | 0.04533323 |
| ZNF880      | 6.176  | 0.00682452 | CKB        | 6.303  | 0.01261043 | HAPLN3      | 6.537  | 0.04578077 |
| PLA2G15     | 2.273  | 0.00689082 | GNG4       | 4.899  | 0.01265703 | C1RL        | 5.225  | 0.04578077 |
| SNUPN       | -5.859 | 0.00695646 | HMGXB3     | 5.173  | 0.01265703 | ADAM12      | 5.885  | 0.04578077 |
| PACSIN2     | -5.629 | 0.00697889 | CENPO      | 6.586  | 0.01265703 | ZBTB6       | -2.610 | 0.04588374 |
| LMBR1       | 6.923  | 0.00697889 | SNORD45B   | 6.590  | 0.01265703 | HARS2       | -4.622 | 0.04732389 |
| ELP6        | -8.780 | 0.00697889 | FARP2      | 4.642  | 0.01274987 | KSR2        | -2.994 | 0.04767363 |
| CHAF1A      | -6.992 | 0.00699774 | SNORA26    | 4.324  | 0.01274987 | TGFBR1      | 3.649  | 0.04767363 |
| MAP2K3      | -5.328 | 0.00702857 | IRF8       | 6.546  | 0.01274987 | YJEFN3      | -3.706 | 0.04767363 |

|           |        |            |            |        |            |         |        |            |
|-----------|--------|------------|------------|--------|------------|---------|--------|------------|
| TRUB2     | -6.683 | 0.0070899  | ZFAND2A    | 5.582  | 0.01281077 | ZNF354A | 4.488  | 0.04767363 |
| RFC4      | -5.314 | 0.00713881 | TRIM14     | -5.555 | 0.01282039 | ZNF397  | -4.236 | 0.04767363 |
| IL4       | -4.148 | 0.00738801 | SLC4A5     | 7.595  | 0.01282039 | ALDOC   | 5.031  | 0.04767363 |
| GOLGA7    | -4.970 | 0.00744381 | TRIP13     | 3.982  | 0.01282039 | PHC1    | 5.101  | 0.04767363 |
| PINX1     | -7.239 | 0.00752646 | EIF3B      | 3.508  | 0.01282039 | ZNF433  | -5.216 | 0.04767363 |
| WDFY4     | 2.862  | 0.00752646 | TMEM161A   | 6.803  | 0.01282039 | NELFB   | -5.047 | 0.04767363 |
| FAM53C    | -6.251 | 0.00752646 | ZNF204P    | 2.355  | 0.01282039 | YOD1    | -4.145 | 0.04767363 |
| SAMD9     | 4.795  | 0.00752646 | FAM86FP    | 4.429  | 0.01282039 | ARG2    | -5.693 | 0.04802835 |
| FHOD1     | -7.932 | 0.00752646 | SLC29A1    | 4.088  | 0.01282039 | LSMEM1  | 4.684  | 0.04802835 |
| HNRNPF    | -3.341 | 0.00772359 | SNORA51    | 4.363  | 0.01289035 | CCDC22  | 3.828  | 0.04802835 |
| DCTPP1    | -4.864 | 0.00772359 | PLEKHN1    | 4.558  | 0.01293812 |         |        |            |
| BAG2      | -6.853 | 0.00772359 | SHISA2     | 3.826  | 0.01298356 |         |        |            |
| C2orf76   | -5.572 | 0.00774319 | TANGO6     | 5.145  | 0.01312562 |         |        |            |
| CSE1L     | -4.924 | 0.00776438 | POLA2      | 8.842  | 0.01315028 |         |        |            |
| FBXO8     | -4.795 | 0.00776438 | SNX24      | -3.670 | 0.01321607 |         |        |            |
| RTTN      | -7.063 | 0.00776438 | SLC5A5     | 5.896  | 0.01327246 |         |        |            |
| PSMB5     | -3.080 | 0.00776438 | ERP27      | -5.349 | 0.01340788 |         |        |            |
| EAF2      | -7.048 | 0.00776438 | NGFRAP1    | 6.432  | 0.01340788 |         |        |            |
| MCOLN2    | -6.162 | 0.00776438 | ZNF831     | -3.608 | 0.01350477 |         |        |            |
| PREPL     | -6.024 | 0.00776438 | ZDHHC4     | 8.787  | 0.01350477 |         |        |            |
| MARCKSL1  | -5.838 | 0.00776438 | SNORA80E   | 3.944  | 0.01350477 |         |        |            |
| GIN52     | -7.411 | 0.00789393 | FCGBP      | -3.639 | 0.01350477 |         |        |            |
| PSTK      | -6.040 | 0.00799654 | IVD        | 3.682  | 0.01350477 |         |        |            |
| C1orf198  | -2.860 | 0.00823893 | FUT4       | 4.411  | 0.01382044 |         |        |            |
| PRMT7     | -7.479 | 0.00823893 | CENPL      | 8.269  | 0.01386583 |         |        |            |
| DHRS7B    | -7.180 | 0.00825519 | NAT1       | 6.286  | 0.01390375 |         |        |            |
| PTPN12    | 4.978  | 0.00828475 | CUL4B      | -5.059 | 0.01433081 |         |        |            |
| PRPF4     | -5.530 | 0.0086227  | ZKSCAN5    | -3.984 | 0.01433081 |         |        |            |
| ATP10D    | 4.599  | 0.00879062 | PLOD3      | -6.864 | 0.01433081 |         |        |            |
| KAT5      | -6.759 | 0.00894324 | SLC43A1    | 4.695  | 0.01449365 |         |        |            |
| AAED1     | 4.835  | 0.00894324 | SOS1       | -3.747 | 0.01449365 |         |        |            |
| PEX13     | -6.541 | 0.00894324 | NUDT14     | -6.215 | 0.01460896 |         |        |            |
| SF3B3     | -3.776 | 0.00899039 | FBXO41     | 6.957  | 0.01460896 |         |        |            |
| CPOX      | -8.286 | 0.00899039 | ZNF696     | -3.420 | 0.01460896 |         |        |            |
| ANGEL1    | 5.790  | 0.00903891 | MOSPD2     | 7.853  | 0.01461388 |         |        |            |
| MARS2     | -4.589 | 0.00906061 | KCTD6      | 4.549  | 0.01495787 |         |        |            |
| TRAP1     | -4.800 | 0.00914548 | HINFP      | 7.233  | 0.01495787 |         |        |            |
| HPGDS     | -4.511 | 0.00921218 | ZNF93      | -3.636 | 0.01504233 |         |        |            |
| PRIM2     | -4.494 | 0.00937923 | FBXL6      | 3.506  | 0.01504233 |         |        |            |
| TMEM216   | -7.136 | 0.00937923 | TREML2     | -4.358 | 0.01504233 |         |        |            |
| ZDHHC4    | -7.591 | 0.00937923 | OC10027221 | 5.078  | 0.01504233 |         |        |            |
| DNAJC17   | -7.024 | 0.00937923 | FAM210B    | -3.836 | 0.01504233 |         |        |            |
| IL10      | -6.846 | 0.00951719 | POC1A      | 5.068  | 0.01504233 |         |        |            |
| MOSPD2    | -6.637 | 0.0097086  | TTN        | -3.730 | 0.01522077 |         |        |            |
| DND1      | -6.032 | 0.00984019 | PSMD6-AS2  | 5.070  | 0.01522077 |         |        |            |
| ATG9B     | 5.572  | 0.00984019 | PLA2G16    | -5.324 | 0.01529268 |         |        |            |
| AK1       | 3.555  | 0.00984019 | CENPP      | 5.316  | 0.01530619 |         |        |            |
| MORN2     | -5.748 | 0.0098756  | FAM188B    | 5.013  | 0.01533534 |         |        |            |
| SRP14-AS1 | -6.664 | 0.0098756  | GRK5       | 4.055  | 0.0153882  |         |        |            |
| RFC3      | -7.406 | 0.00996689 | TTK        | 6.595  | 0.0153882  |         |        |            |
| IPW       | -5.724 | 0.01000242 | ATF5       | 5.223  | 0.01547257 |         |        |            |
| IL1RAP    | -5.502 | 0.01000242 | LINC00926  | -3.180 | 0.015569   |         |        |            |
| BICD2     | -4.774 | 0.01000242 | SLC38A6    | 7.550  | 0.015569   |         |        |            |
| SCARNA9L  | 4.051  | 0.01000242 | MCC        | -3.820 | 0.01596847 |         |        |            |

|           |        |            |            |        |            |
|-----------|--------|------------|------------|--------|------------|
| ANAPC10   | -7.564 | 0.01001016 | PSEN2      | 5.545  | 0.01600636 |
| FAIM3     | 4.809  | 0.01014496 | ZNF397     | 6.354  | 0.01618994 |
| ERI1      | -5.399 | 0.01037004 | ASB13      | 4.831  | 0.01658769 |
| LINC01128 | -6.803 | 0.01039937 | ORAI3      | 6.026  | 0.01658769 |
| POLR3K    | -4.139 | 0.01039937 | HPGD       | -6.572 | 0.01658769 |
| FAM21A    | -5.236 | 0.01039937 | FIRRE      | 5.688  | 0.01658769 |
| FAM122A   | -5.902 | 0.01039937 | ZNF880     | -6.122 | 0.01666693 |
| KDM3A     | 4.053  | 0.01039937 | DHRS13     | 6.337  | 0.01666693 |
| MRPL35    | -7.464 | 0.01043382 | ZNF226     | 6.704  | 0.01666693 |
| KLHDC4    | -5.709 | 0.01047149 | USP2-AS1   | 4.417  | 0.01686156 |
| VIPAS39   | -5.761 | 0.01047149 | IL16       | -3.499 | 0.01688105 |
| ZFP30     | -5.041 | 0.01047149 | TRIB1      | 5.570  | 0.01688105 |
| IL5       | -7.153 | 0.01047149 | SALL2      | -2.820 | 0.01705868 |
| LINC00494 | 2.384  | 0.01050862 | ZWILCH     | 7.660  | 0.0171313  |
| SEC31B    | 4.025  | 0.01057007 | ACTR5      | -5.474 | 0.0171313  |
| RFC2      | -6.343 | 0.01066786 | TTYH3      | 2.898  | 0.0171313  |
| MIS12     | -6.355 | 0.01067107 | CDCA7      | 6.372  | 0.01747501 |
| NOL10     | -4.747 | 0.01067107 | GRIP1      | -4.287 | 0.01747501 |
| KIAA0232  | -8.437 | 0.01074015 | KCNQ1OT1   | -4.386 | 0.01761623 |
| KIAA0753  | -4.369 | 0.01076164 | CATSPER2P1 | 4.488  | 0.01780461 |
| FTCDNL1   | 4.495  | 0.01083284 | ZNF557     | 4.604  | 0.01808737 |
| RRAS      | 3.237  | 0.010991   | FAXDC2     | -5.774 | 0.01820891 |
| MRPL30    | -5.585 | 0.01099284 | PCBP4      | -5.903 | 0.01820891 |
| UTP6      | -3.651 | 0.01099284 | TERT       | 4.972  | 0.01835827 |
| IL9       | -2.580 | 0.01126897 | MBP        | -4.409 | 0.01836044 |
| TMEM219   | -3.877 | 0.01140446 | RNF219     | 5.842  | 0.01875366 |
| MRPS2     | -6.872 | 0.01170631 | SRP14-AS1  | 6.004  | 0.01875366 |
| KLF12     | 4.595  | 0.01173649 | ZDHHC6     | 4.724  | 0.01878746 |
| TMEM2     | 3.859  | 0.01189282 | ASB7       | 5.745  | 0.0191157  |
| CCDC86    | -6.627 | 0.01195009 | CCDC71     | 5.873  | 0.0191157  |
| NCLN      | -6.843 | 0.01197398 | PNPO       | 4.368  | 0.0191157  |
| PGM2L1    | -6.973 | 0.01197398 | SCCPDH     | 6.974  | 0.01946124 |
| PYGO2     | 7.130  | 0.0120074  | NEFH       | 6.222  | 0.01946124 |
| ETS1      | 3.064  | 0.0120074  | VPRBP      | 6.113  | 0.01946124 |
| MAGEE1    | -5.654 | 0.01210737 | GPR160     | 5.680  | 0.01946124 |
| RNF24     | 4.993  | 0.01215627 | LINC00944  | -7.816 | 0.01946124 |
| PSMD6-AS2 | -4.288 | 0.01220366 | METAP1     | 2.739  | 0.01946124 |
| PACS2     | -5.019 | 0.01220366 | PINX1      | 7.378  | 0.01946124 |
| POU2AF1   | -5.479 | 0.01220366 | NAA30      | 4.314  | 0.01959893 |
| ADPRHL2   | -6.311 | 0.01220366 | CLUHP3     | 4.440  | 0.0199269  |
| AFF3      | -5.516 | 0.01220366 | STX3       | 6.773  | 0.02012636 |
| MEST      | -5.285 | 0.01231744 | RHOC       | -6.541 | 0.02033751 |
| ACAD9     | -5.600 | 0.01231744 | C15orf53   | -3.698 | 0.02033751 |
| EGR2      | -4.868 | 0.01232636 | LAMB1      | 5.614  | 0.02040626 |
| LRR1      | -7.389 | 0.01241077 | ORC6       | 6.269  | 0.02048999 |
| NUBP1     | -5.986 | 0.01241077 | IL24       | 2.502  | 0.02052912 |
| CD40      | -2.867 | 0.01241077 | NRIP1      | 5.597  | 0.02097535 |
| CDYL      | -6.617 | 0.01249381 | FGF18      | 5.292  | 0.02099369 |
| RSPRY1    | 4.149  | 0.01249381 | CENPW      | 5.737  | 0.02099369 |
| PIK3CG    | -6.452 | 0.01249381 | LDLRAP1    | 4.902  | 0.02123458 |
| UNK       | -7.650 | 0.01249381 | ATG9B      | -4.140 | 0.02128453 |
| ABLIM1    | 4.022  | 0.01257415 | HHLA3      | 2.297  | 0.02140124 |
| JOSD2     | -4.434 | 0.01264234 | C5orf51    | 4.375  | 0.02149076 |
| ZNF7      | -3.877 | 0.01264234 | GTF3C3     | 3.777  | 0.02149076 |

|             |        |            |            |        |            |
|-------------|--------|------------|------------|--------|------------|
| SMC1B       | -6.278 | 0.0126903  | RSC1A1     | -6.646 | 0.02149076 |
| OC10050614: | 1.896  | 0.01272936 | P4HA2      | -2.834 | 0.02186998 |
| SEC23IP     | -5.227 | 0.01275965 | OSTM1      | -4.901 | 0.02186998 |
| TTLL12      | -5.379 | 0.01275965 | AQR        | 3.308  | 0.02186998 |
| KLHL3       | -4.105 | 0.01293871 | TMCO6      | 3.199  | 0.02246564 |
| UHRF1       | -6.642 | 0.01304523 | TEKT4P2    | 3.467  | 0.02259612 |
| PIGP        | -7.075 | 0.01304523 | PHF7       | 5.187  | 0.02259612 |
| MKS1        | -5.110 | 0.01304523 | CLN6       | 4.513  | 0.02269015 |
| ANO6        | -5.837 | 0.01304523 | LIG4       | 5.264  | 0.02297388 |
| CCNH        | -5.701 | 0.01304523 | ZNF391     | 2.510  | 0.02315263 |
| MFHAS1      | -5.071 | 0.01306429 | DEPDC1B    | 4.839  | 0.02315263 |
| PPCDC       | -6.750 | 0.01314124 | SNHG10     | 5.818  | 0.02315263 |
| IL21        | -6.070 | 0.01318128 | GBP5       | -4.122 | 0.0231837  |
| SLC37A4     | -4.437 | 0.01318814 | GALNT10    | -5.626 | 0.0231837  |
| RHOA        | -4.290 | 0.01331912 | PEX13      | 7.649  | 0.02345702 |
| HDAC6       | -6.539 | 0.01338181 | MINPP1     | 6.062  | 0.0234575  |
| PYCR1       | -6.154 | 0.01341814 | BRI3BP     | 4.190  | 0.0234575  |
| TIMMDC1     | -4.796 | 0.01344372 | RARRES3    | -3.881 | 0.0234575  |
| UBE2H       | 4.147  | 0.01348333 | C16orf71   | 4.938  | 0.02367622 |
| POMGNT2     | -3.720 | 0.01369735 | CRIP2      | -1.787 | 0.02367622 |
| DCUN1D3     | -5.317 | 0.01369735 | CAPN2      | -4.009 | 0.02367622 |
| SDHAF4      | -5.354 | 0.01371544 | MAP1B      | 8.355  | 0.02367622 |
| HIBCH       | -5.357 | 0.01377924 | RNF8       | 5.903  | 0.02367622 |
| MPG         | -6.387 | 0.01383165 | DERA       | 7.174  | 0.02367622 |
| ANKRD20A5P  | -3.434 | 0.01401637 | ATP2A1-AS1 | 3.470  | 0.02367622 |
| NOL6        | -6.387 | 0.0141921  | SNUPN      | 6.132  | 0.02367622 |
| IPO13       | -5.494 | 0.01426565 | UTRN       | -3.839 | 0.02367622 |
| SLC43A3     | -5.140 | 0.01441617 | STAP2      | 3.941  | 0.02367622 |
| ZNF331      | -5.754 | 0.01452355 | LOC284009  | 3.965  | 0.02367622 |
| NCK1-AS1    | -3.142 | 0.01458223 | CAPG       | -4.668 | 0.02377217 |
| PDE6B       | -7.743 | 0.01483813 | MID2       | -2.568 | 0.02422365 |
| OXCT1       | -4.961 | 0.01489447 | INAFM1     | 3.563  | 0.02425423 |
| DAAM1       | -7.253 | 0.01509996 | NAF1       | 6.052  | 0.02429731 |
| EEF2KMT     | -6.685 | 0.01517171 | SNORD19    | 4.152  | 0.02437136 |
| METTL1      | -5.311 | 0.01517171 | RAB34      | 5.758  | 0.02464833 |
| ZCCHC17     | -4.404 | 0.01517171 | MAN1B1-AS1 | 3.650  | 0.02472924 |
| SNX30       | -5.114 | 0.01518961 | BYSL       | 6.493  | 0.02480229 |
| CCDC22      | -4.154 | 0.01521675 | GEN1       | 4.665  | 0.02497377 |
| SQRDL       | -4.191 | 0.01521675 | UHRF1      | 7.284  | 0.02570672 |
| IL7R        | 2.297  | 0.0152917  | C15orf57   | 3.566  | 0.02642969 |
| HTRA2       | -6.472 | 0.01556929 | ARL16      | 4.268  | 0.02650704 |
| TMEM38B     | -2.599 | 0.01556929 | GNA15      | -5.096 | 0.02650704 |
| TMUB2       | -3.090 | 0.01556929 | HACD4      | -5.154 | 0.02657377 |
| PLAA        | -5.619 | 0.01558523 | ICA1       | 6.825  | 0.02679116 |
| KBTD7       | -1.209 | 0.01560027 | HIP1R      | 4.633  | 0.02696305 |
| GNPTAB      | -5.705 | 0.01560027 | NPAS2      | 4.315  | 0.02696305 |
| ZNF14       | 4.493  | 0.01565982 | TMEM200A   | -4.587 | 0.02696305 |
| NUP43       | -5.627 | 0.01567385 | HIST1H1B   | -3.543 | 0.02698932 |
| DKC1        | -3.009 | 0.01576262 | SLC3A2     | 4.181  | 0.02712763 |
| CHPF        | -4.387 | 0.01577215 | LIMS2      | 7.308  | 0.02713036 |
| DES12       | -4.431 | 0.01618841 | MAGI3      | -5.091 | 0.02713036 |
| AAR2        | -5.558 | 0.01640711 | TOLLIP     | 4.528  | 0.02713036 |
| MIR4697HG   | 3.278  | 0.0168311  | TCP11L2    | -2.136 | 0.02713036 |
| CRACR2A     | 5.921  | 0.01698793 | SNTA1      | -3.709 | 0.02713036 |

|             |        |            |           |        |            |
|-------------|--------|------------|-----------|--------|------------|
| RPF2        | -3.114 | 0.017209   | PJA1      | 4.790  | 0.02735795 |
| CDCA7       | -6.172 | 0.01753332 | PLCG1-AS1 | -5.064 | 0.02737581 |
| NTHL1       | -5.453 | 0.01753332 | MXI1      | 6.854  | 0.02739181 |
| PAAF1       | -4.989 | 0.01753332 | GAS5-AS1  | 4.711  | 0.02743804 |
| OLA1        | -5.175 | 0.0175413  | FAF2      | 4.523  | 0.02743804 |
| APOO        | -6.836 | 0.01785937 | ZNF583    | -3.980 | 0.02743804 |
| CCNT1       | 3.772  | 0.01791678 | ETAA1     | 5.735  | 0.02855254 |
| LINC00847   | -4.135 | 0.01791678 | C14orf93  | 5.819  | 0.0287206  |
| WDR3        | -4.776 | 0.01791678 | HPX       | -2.669 | 0.0287206  |
| IL13        | -5.626 | 0.01791678 | DNTTIP1   | 5.008  | 0.0288974  |
| MED18       | -4.975 | 0.01802945 | POLR3H    | 6.305  | 0.0288974  |
| ELF4        | -5.678 | 0.01813067 | TMEM2     | -4.305 | 0.0288974  |
| POLE4       | -7.060 | 0.01825776 | HSF2      | 8.516  | 0.0288974  |
| ARV1        | -7.202 | 0.01825776 | MICAL1    | -5.829 | 0.0288974  |
| AFF1        | -5.779 | 0.01827049 | AURKA     | 4.905  | 0.0288974  |
| NIF3L1      | -5.190 | 0.01827049 | SHCBP1    | 5.037  | 0.02896966 |
| CPPED1      | -6.164 | 0.01827049 | HPDL      | 4.752  | 0.02903338 |
| SRSF8       | -5.575 | 0.01827049 | TP53TG1   | 6.724  | 0.02933772 |
| TAF1A       | -6.264 | 0.01827049 | CETN3     | 4.807  | 0.02946901 |
| XYLT1       | -5.628 | 0.01827049 | FN1       | 6.268  | 0.02956658 |
| PON2        | -4.834 | 0.01835846 | FAM185A   | 5.405  | 0.02971265 |
| RNASEH1-AS1 | -6.848 | 0.01836213 | CALCOCO1  | -1.710 | 0.0301438  |
| ASUN        | -5.174 | 0.01857962 | FBXO15    | 4.339  | 0.03014971 |
| HLA-DRB5    | 3.536  | 0.01865777 | CDK1      | 2.815  | 0.03108584 |
| UBN2        | -6.489 | 0.01865986 | MIR3607   | 2.808  | 0.03113326 |
| POLR1C      | -3.320 | 0.01893707 | RRAGD     | 7.447  | 0.0312408  |
| CEP131      | 4.019  | 0.01893707 | ZKSCAN4   | 3.564  | 0.0312408  |
| BEND3       | -5.379 | 0.01894314 | NR4A3     | 5.075  | 0.0312408  |
| AGO1        | -4.914 | 0.01894314 | KCNAB1    | 6.013  | 0.0312408  |
| DDR GK1     | -6.519 | 0.01894314 | NLE1      | 6.302  | 0.0312408  |
| GZMB        | -4.333 | 0.01940326 | SERPINI1  | -3.367 | 0.0312408  |
| ANKZF1      | 4.775  | 0.01941286 | TTC25     | -3.842 | 0.0312408  |
| ZC3H10      | 2.828  | 0.02000909 | CCDC85C   | 5.839  | 0.0312408  |
| AK3         | -6.716 | 0.02000909 | LNX2      | 6.074  | 0.03130441 |
| MTPAP       | -2.842 | 0.0200233  | BCS1L     | 8.030  | 0.03133264 |
| PTGFRN      | -4.270 | 0.0200233  | LEF1      | 3.478  | 0.03137308 |
| CYBRD1      | -3.085 | 0.02003783 | C11orf84  | 4.878  | 0.03137308 |
| C2orf15     | 3.661  | 0.02003783 | LOC400863 | 5.898  | 0.03161136 |
| MINPP1      | -5.134 | 0.02003783 | TPD52L2   | 3.622  | 0.03240999 |
| PITRM1      | -6.275 | 0.02003783 | CPM       | 4.440  | 0.03254486 |
| GATB        | -6.857 | 0.02013351 | ASB6      | 3.693  | 0.03277203 |
| MTERF4      | -6.901 | 0.02015325 | ARMC2     | -2.959 | 0.03294723 |
| NOC3L       | -4.128 | 0.02019074 | MYB       | 7.117  | 0.03297918 |
| MORC2       | -5.810 | 0.02019074 | DPP4      | -4.172 | 0.03297918 |
| MIPEP       | -4.423 | 0.02046994 | NOC3L     | 3.148  | 0.03297918 |
| IPPK        | -6.116 | 0.02049815 | CDT1      | 5.907  | 0.03297918 |
| RRAGA       | -6.549 | 0.02060141 | GNL3      | 2.419  | 0.03297918 |
| MICAL2      | -6.630 | 0.02060141 | RHEBL1    | -2.785 | 0.03299052 |
| ZNF626      | 6.166  | 0.02060141 | ZNF844    | -3.256 | 0.03301982 |
| HSDL1       | -6.123 | 0.02060141 | GRAMD4    | 5.278  | 0.03306556 |
| ATP9B       | -6.645 | 0.02115717 | FAM105A   | -4.556 | 0.03313102 |
| CSF2        | -3.677 | 0.02119572 | SYNE2     | -2.666 | 0.03317612 |
| LAP3        | -5.189 | 0.0212474  | BLZF1     | -4.815 | 0.03327497 |
| TNFRSF10A   | 6.443  | 0.02125345 | DPYD      | -3.518 | 0.03337735 |



|           |        |            |           |        |            |
|-----------|--------|------------|-----------|--------|------------|
| TSPYL4    | 5.293  | 0.02156959 | DDX26B    | 5.986  | 0.03337735 |
| ARMC6     | -6.329 | 0.02197545 | IL9       | -3.000 | 0.03381481 |
| NCALD     | -5.118 | 0.02200125 | PDZD4     | -3.744 | 0.03409233 |
| TREML2    | 3.983  | 0.02200125 | GRAMD1B   | 7.000  | 0.03409233 |
| SNORA40   | -3.952 | 0.02200125 | MARCKSL1  | 5.770  | 0.03409233 |
| TSFM      | -5.834 | 0.02200125 | GAS2      | -2.995 | 0.03425364 |
| DNASE1L1  | 3.708  | 0.02200125 | CAMK2N1   | -6.141 | 0.03425364 |
| SCCPDH    | -4.061 | 0.02200125 | ITGB2-AS1 | -4.817 | 0.03425364 |
| LCLAT1    | -5.960 | 0.02202169 | FLT1      | 3.891  | 0.03470512 |
| MOSPD3    | -5.404 | 0.02223719 | CNKSR2    | 5.219  | 0.03495678 |
| HDHD1     | -6.549 | 0.02223719 | ASB14     | 3.313  | 0.03495678 |
| NSUN3     | -6.294 | 0.02223719 | ZNF646    | 4.738  | 0.03495678 |
| TRIT1     | -6.713 | 0.02223719 | KNTC1     | 5.055  | 0.03495678 |
| KLHL9     | -5.142 | 0.02223719 | C19orf40  | 4.725  | 0.03495678 |
| LPIN1     | 3.483  | 0.02224626 | C6orf52   | 3.121  | 0.03521607 |
| POFUT2    | -7.214 | 0.02238373 | LIG1      | 2.564  | 0.03521607 |
| TMCO6     | -2.630 | 0.02261589 | ZNF823    | 2.630  | 0.03580123 |
| C6orf106  | -3.572 | 0.02261589 | RGS1      | -2.854 | 0.03580123 |
| NLE1      | -5.412 | 0.02266578 | PDE3B     | -3.381 | 0.03580123 |
| ZNF429    | -5.593 | 0.02275288 | PRKCZ     | -3.820 | 0.0361575  |
| HS1BP3    | -6.644 | 0.02284832 | EXO1      | 2.628  | 0.03631368 |
| USP31     | -7.772 | 0.02299807 | CHKB      | 4.344  | 0.03658969 |
| CMTR2     | -5.943 | 0.02299807 | ZNF331    | 7.257  | 0.03682337 |
| VBP1      | -4.071 | 0.02299807 | PMS2P1    | 4.449  | 0.03682337 |
| MRPL27    | -4.391 | 0.02312905 | GLIPR2    | -3.869 | 0.03711966 |
| CLSPN     | -6.336 | 0.02312905 | BIK       | 6.333  | 0.0373042  |
| PDZD4     | 3.385  | 0.02312905 | TAF2      | -3.594 | 0.03737598 |
| CCDC73    | -6.039 | 0.02369238 | ZNF280D   | 4.540  | 0.03737598 |
| FCRL1     | 1.953  | 0.02414431 | GPRASP1   | 3.837  | 0.03767346 |
| USP10     | -2.937 | 0.02432668 | ARSK      | 6.261  | 0.03773415 |
| CTBP2     | -4.332 | 0.02453329 | PPIP5K1   | 4.461  | 0.03773415 |
| PSMD3     | -5.023 | 0.02460031 | SERPINE2  | 7.108  | 0.03773415 |
| CDK4      | -4.864 | 0.02475798 | GALE      | 3.506  | 0.0377534  |
| C7orf25   | -3.866 | 0.02521655 | RASGRF2   | 4.293  | 0.0381094  |
| MCM4      | -5.765 | 0.02527378 | ZNF345    | -3.637 | 0.0381094  |
| FOSL1     | -2.812 | 0.02527378 | ATM       | -3.263 | 0.03817721 |
| JAGN1     | -4.197 | 0.02527378 | GINS1     | 7.553  | 0.03817721 |
| STARD3NL  | -4.166 | 0.02527378 | TEX10     | 4.817  | 0.03817721 |
| SLC38A6   | -5.666 | 0.02527751 | ZNF222    | 2.569  | 0.03817721 |
| RB1       | 5.675  | 0.02527751 | LAMP3     | 4.823  | 0.03817721 |
| PDZRN3    | 3.329  | 0.02534317 | TRIP4     | -4.822 | 0.038261   |
| KCTD6     | -3.137 | 0.02534868 | CTU2      | 5.578  | 0.038261   |
| BCL2L1    | -5.351 | 0.02534868 | EIF4EBP1  | 4.462  | 0.038261   |
| HACE1     | -6.188 | 0.02542818 | GPT2      | 2.521  | 0.038261   |
| HGSNAT    | -6.088 | 0.02546614 | ASF1B     | 3.264  | 0.03862011 |
| C4orf26   | -3.015 | 0.02550629 | PIM1      | -3.749 | 0.03873393 |
| C14orf159 | 6.470  | 0.02563869 | UBXN6     | 6.092  | 0.03873393 |
| HYAL2     | -4.257 | 0.02570066 | ESPL1     | 5.426  | 0.03875724 |
| BTK       | 2.385  | 0.02570066 | MRPS30    | 4.865  | 0.03875724 |
| ASB1      | -3.827 | 0.02579961 | KDM3A     | -4.123 | 0.03875724 |
| GPR89A    | -6.104 | 0.02612764 | C4orf46   | 5.265  | 0.03875724 |
| CRYBG3    | -3.439 | 0.02612764 | C12orf45  | 4.677  | 0.03875724 |
| ABCA1     | 2.341  | 0.02618053 | CCDC66    | 3.295  | 0.03875724 |
| TPX2      | -3.661 | 0.02661081 | MEST      | 5.058  | 0.03880317 |

|           |        |            |              |        |            |
|-----------|--------|------------|--------------|--------|------------|
| EZH1      | -5.044 | 0.02661081 | ARHGAP10     | -4.447 | 0.03880317 |
| GIMAP4    | 3.901  | 0.02661081 | KATNB1       | 6.434  | 0.03882801 |
| PEX3      | -6.213 | 0.02667145 | PRMT5        | 4.379  | 0.03903981 |
| ZFAND2A   | -5.327 | 0.02667145 | SAPCD2       | 4.953  | 0.03905178 |
| FANCB     | -3.510 | 0.02667423 | GZMB         | 4.590  | 0.03905178 |
| POLA2     | -8.306 | 0.02667423 | TMEM131      | 4.721  | 0.03905178 |
| VPS8      | -5.264 | 0.02671494 | TK1          | 3.703  | 0.03925026 |
| RBBP4     | -3.178 | 0.02673321 | ZNF736       | 3.030  | 0.03929456 |
| MCM2      | -5.952 | 0.02673321 | DLEU1        | 7.912  | 0.03948096 |
| RGS2      | -5.107 | 0.02719379 | ZBTB21       | 5.539  | 0.03951238 |
| TMEM234   | -4.552 | 0.02722428 | ZHX1-C8orf76 | -3.340 | 0.0396772  |
| COX11     | -6.299 | 0.02722428 | PREPL        | 4.177  | 0.0396772  |
| NARF      | -4.022 | 0.02738683 | TYSND1       | -3.808 | 0.03993244 |
| MRPL17    | -4.114 | 0.02738683 | C6orf201     | -3.795 | 0.04030684 |
| GCNT1     | -5.405 | 0.02738683 | IQCE         | 4.916  | 0.04046263 |
| DDIT4L    | 1.417  | 0.02748718 | PGM1         | 7.794  | 0.04054811 |
| ZNF570    | -5.787 | 0.02776312 | ZNF473       | 3.117  | 0.04054811 |
| B3GAT3    | -5.170 | 0.02783652 | SAC3D1       | 3.996  | 0.04054811 |
| EED       | -2.947 | 0.02788779 | SMAD3        | -6.495 | 0.04054811 |
| EFNA4     | -3.875 | 0.02788779 | RMI1         | 8.501  | 0.04054811 |
| FNDC9     | -3.967 | 0.02788779 | SNORA28      | -1.416 | 0.04054811 |
| TMEM161A  | -4.566 | 0.02788779 | BCL11A       | 6.254  | 0.04054811 |
| SPINT2    | -4.352 | 0.02815712 | CIAPIN1      | 2.984  | 0.04054811 |
| N6AMT1    | 3.738  | 0.02815712 | ZNF26        | 7.339  | 0.04054811 |
| DAPK2     | 2.028  | 0.02819401 | LINC00641    | 3.943  | 0.04054811 |
| TOR2A     | -5.025 | 0.02823195 | MTFR1L       | 7.307  | 0.04101054 |
| RNF26     | -3.989 | 0.02831173 | CYBB         | -2.861 | 0.04129839 |
| TRIM14    | 3.669  | 0.02834719 | FBXL13       | 4.200  | 0.04129839 |
| EFCAB11   | -3.829 | 0.02835002 | SNORD51      | 4.413  | 0.04129839 |
| TRUB1     | -7.416 | 0.02835002 | ZNF239       | 7.277  | 0.04149562 |
| DGCR2     | -2.914 | 0.02837099 | WDR47        | -4.163 | 0.04170997 |
| APPBP2    | -7.535 | 0.0285178  | CEP126       | 4.847  | 0.04177471 |
| SLC25A33  | -5.354 | 0.02880956 | ZBED4        | -5.298 | 0.04177471 |
| GIMAP1    | 8.718  | 0.02881081 | ZC4H2        | 2.108  | 0.04177471 |
| PRKAB1    | -4.093 | 0.02889942 | TTLL4        | 5.117  | 0.04177471 |
| GYS1      | -6.327 | 0.02892757 | RCSD1        | -4.549 | 0.04240884 |
| JAKMIP1   | -5.603 | 0.02932795 | NFIA         | -3.781 | 0.04240884 |
| SNORD14D  | -5.405 | 0.02932795 | NLRX1        | 3.734  | 0.04259111 |
| LOC90784  | -5.777 | 0.02932795 | S100A4       | -2.673 | 0.04290539 |
| NFIL3     | -4.032 | 0.02936849 | APPBP2       | 5.866  | 0.042971   |
| PIGU      | -5.302 | 0.0294961  | PAQR7        | 6.240  | 0.04314274 |
| SH3BGRL   | 3.068  | 0.0298287  | INSL3        | 4.480  | 0.04347507 |
| CSNK1G1   | 4.351  | 0.02994467 | PVRL1        | -4.437 | 0.04347507 |
| FGFR1     | -3.156 | 0.02997708 | CSRNP2       | 5.257  | 0.04347507 |
| DENND4B   | -6.829 | 0.02999388 | EFCAB14-AS1  | 4.283  | 0.04347507 |
| MRPL46    | -5.031 | 0.03022852 | LOC399715    | -3.434 | 0.04347507 |
| PPP4R1L   | -3.249 | 0.03037536 | RP9P         | -2.796 | 0.04347507 |
| COQ2      | -4.708 | 0.03037536 | LY75         | -5.507 | 0.04355169 |
| RAB11FIP5 | -5.437 | 0.03037536 | ZBTB39       | 6.973  | 0.04355169 |
| NLRP3     | -3.360 | 0.03058033 | DIXDC1       | 5.635  | 0.04362418 |
| PLA2G12A  | -5.196 | 0.0307514  | KNSTRN       | 4.264  | 0.04370569 |
| SLC25A15  | -6.068 | 0.03077246 | LINC00672    | -4.369 | 0.04370569 |
| TMEM185A  | -3.693 | 0.03095005 | SEMA4B       | 2.620  | 0.04388616 |
| ZNRF3     | -5.028 | 0.03095005 | TBXAS1       | -3.034 | 0.04388616 |

|           |        |            |             |        |            |
|-----------|--------|------------|-------------|--------|------------|
| BCS1L     | -6.017 | 0.03130381 | TMEM68      | 5.976  | 0.04392132 |
| HYAL3     | -5.079 | 0.03144591 | GABPB2      | 2.958  | 0.04392132 |
| KCNAB1    | -4.757 | 0.03151481 | FRMD6       | 2.989  | 0.04392132 |
| ADAT1     | 3.839  | 0.03159422 | GPATCH1     | 6.207  | 0.04392132 |
| ZNF575    | -3.946 | 0.03160547 | NAA50       | 2.892  | 0.04420086 |
| ZNF567    | -3.303 | 0.03160547 | ERRFI1      | 3.113  | 0.04420086 |
| POLR3G    | -6.060 | 0.03160547 | ALKBH4      | 2.509  | 0.04420086 |
| CIAPIN1   | -3.514 | 0.03171811 | SLFN12      | -4.035 | 0.04420086 |
| NUP133    | -6.742 | 0.03178463 | ACCS        | -3.224 | 0.04420086 |
| DNAJC11   | -5.673 | 0.03178463 | DARS2       | 5.189  | 0.04420086 |
| PXYLP1    | -3.902 | 0.03189023 | GABPA       | 5.366  | 0.04420086 |
| LIG3      | -6.732 | 0.03194932 | LINC00426   | -3.543 | 0.04420086 |
| ZNF546    | -2.833 | 0.03211105 | VMAC        | 3.112  | 0.04436174 |
| LDHA      | -1.998 | 0.03245118 | ZNF689      | 4.728  | 0.04450782 |
| C11orf84  | -4.310 | 0.03246046 | PRMT6       | 6.146  | 0.04466575 |
| NUDT16L1  | -6.097 | 0.03258594 | ZNF548      | -4.524 | 0.04480486 |
| KIF3C     | -4.018 | 0.03267418 | DHX8        | -3.998 | 0.04481458 |
| COG1      | -6.575 | 0.0327835  | TST         | -1.708 | 0.04484948 |
| DTNBP1    | 5.168  | 0.03278594 | DUS2        | 6.044  | 0.04484948 |
| TMCC1     | 6.514  | 0.03278594 | THBS1       | -4.915 | 0.04484948 |
| AUP1      | -4.108 | 0.03278594 | ANGPT2      | 6.268  | 0.04484948 |
| AP4S1     | -5.712 | 0.03282893 | C20orf196   | 4.171  | 0.0448979  |
| TRIB2     | 4.034  | 0.03287701 | SNORA5C     | 3.558  | 0.0450202  |
| BYSL      | -6.150 | 0.03310639 | LDHA        | 1.820  | 0.04511254 |
| ASH1L     | 3.602  | 0.03352636 | TNFSF13B    | -3.874 | 0.04518782 |
| ERI3      | -5.141 | 0.03369366 | GNL2        | 3.323  | 0.04518782 |
| MOB1B     | -8.093 | 0.03410435 | PCYT2       | -2.435 | 0.04518782 |
| GATC      | -5.204 | 0.03486999 | KIF15       | 2.769  | 0.04518782 |
| HSD17B7   | -7.386 | 0.03487966 | COPS7B      | 3.512  | 0.04518782 |
| SLC25A20  | -5.013 | 0.03505365 | SLC2A1      | 4.778  | 0.04521696 |
| CRELD1    | -4.095 | 0.03505894 | PKIA        | 4.516  | 0.04533767 |
| FLVCR2    | 2.639  | 0.03513237 | MICALL1     | -4.704 | 0.04533767 |
| SLC37A3   | 3.536  | 0.03526287 | TRIM32      | 3.024  | 0.04544601 |
| ZNF333    | -4.049 | 0.03528067 | ZNF367      | 3.326  | 0.04547679 |
| ZNF844    | 2.562  | 0.03528067 | FLVCR1-AS1  | -2.522 | 0.04573909 |
| PAQR7     | -6.396 | 0.03528067 | ZNF561-AS1  | -2.687 | 0.04576556 |
| ADO       | -6.243 | 0.03528067 | WDFY4       | -1.711 | 0.04666554 |
| ORC1      | -4.313 | 0.03528067 | CHAF1A      | 7.061  | 0.04682748 |
| ZNF275    | 7.045  | 0.03528067 | CLIC5       | -5.038 | 0.0469533  |
| GALK2     | -6.219 | 0.03537389 | FANCF       | 7.042  | 0.0469533  |
| PTPRN2    | 2.902  | 0.03542726 | STK26       | 4.656  | 0.0470404  |
| C16orf70  | -5.870 | 0.03542726 | AAMP        | 3.865  | 0.04708136 |
| DPY19L1P1 | -3.381 | 0.03562297 | OC100506990 | -4.682 | 0.04708136 |
| MBOAT2    | -3.645 | 0.03609529 | IQSEC1      | -4.566 | 0.04721607 |
| CTSW      | -2.804 | 0.03633277 | ZNF283      | -2.867 | 0.04721607 |
| LOC729732 | 4.439  | 0.03635174 | NPL         | 6.042  | 0.04721607 |
| ZHX3      | -5.872 | 0.03635174 | ODC1        | 3.386  | 0.04721607 |
| NSDHL     | -6.075 | 0.03637877 | DIP2C       | -2.920 | 0.04721607 |
| GGCT      | -5.315 | 0.03645418 | HECTD3      | 5.911  | 0.04721607 |
| FAM73B    | -3.473 | 0.03650012 | MCM4        | 5.772  | 0.04848863 |
| FBXO6     | -5.457 | 0.03660777 | NCOA2       | -6.398 | 0.04848863 |
| NCOA2     | 3.897  | 0.03661247 | JAM3        | 5.196  | 0.04860211 |
| ACER3     | 3.846  | 0.03661247 | BACH1-IT2   | 2.869  | 0.04863986 |
| FAIM      | -6.485 | 0.03661247 | WRN         | 5.753  | 0.04865069 |

|             |        |            |           |        |            |
|-------------|--------|------------|-----------|--------|------------|
| NFIA        | 4.875  | 0.03661247 | METAP2    | 2.387  | 0.0486961  |
| OC10063091: | 2.224  | 0.03661247 | CDC25A    | 6.865  | 0.04880585 |
| ASAP1-IT2   | -2.580 | 0.03661247 | C10orf128 | -6.534 | 0.04880585 |
| KIAA1467    | -5.137 | 0.03661247 | ZNF182    | 7.974  | 0.04892503 |
| SORD        | -5.596 | 0.03691646 | PDE9A     | 5.983  | 0.04892503 |
| GRSF1       | -4.068 | 0.03713519 | RARB      | 3.129  | 0.04928526 |
| PFKFB2      | -2.398 | 0.03717389 | MRS2      | 5.577  | 0.04928526 |
| HAUS5       | -6.147 | 0.03732723 | ATG101    | 5.501  | 0.04932769 |
| SLC25A17    | -6.528 | 0.03739034 | SLC25A33  | 5.580  | 0.04940845 |
| C5orf30     | -3.734 | 0.03739034 | CRISPLD2  | 4.639  | 0.0494785  |
| KLF5        | 4.022  | 0.03739034 | RPL36A    | 5.144  | 0.04956089 |
| SYNE2       | 2.274  | 0.03739034 | DESI1     | 4.500  | 0.04956089 |
| OC10050698: | -5.578 | 0.03739034 | TMEM156   | -5.262 | 0.04964201 |
| ACAT1       | -3.300 | 0.03739034 | WASF1     | 4.043  | 0.04973363 |
| SAPCD2      | -4.214 | 0.03739034 | NTRK1     | -3.053 | 0.04980726 |
| SNORA62     | -3.738 | 0.03739034 | OXCT1     | 3.578  | 0.04980726 |
| RNU5A-1     | -5.594 | 0.03739034 | ZNF461    | -1.868 | 0.04980726 |
| TAGLN       | 4.448  | 0.03739034 |           |        |            |
| SLC2A8      | -4.810 | 0.03739034 |           |        |            |
| NDST2       | 5.762  | 0.03739034 |           |        |            |
| SLC35E3     | -4.908 | 0.03755497 |           |        |            |
| MOB1A       | -4.208 | 0.03762217 |           |        |            |
| KRBOX4      | -5.813 | 0.03767657 |           |        |            |
| TAF9B       | -3.612 | 0.03767657 |           |        |            |
| PHKG2       | -8.071 | 0.03794133 |           |        |            |
| KDELC2      | -5.479 | 0.03797766 |           |        |            |
| TSR2        | -3.987 | 0.0382846  |           |        |            |
| PHLDB2      | 3.841  | 0.03847493 |           |        |            |
| DYNLL2      | -5.699 | 0.03851488 |           |        |            |
| HADH        | 2.910  | 0.03851488 |           |        |            |
| MIS18A      | -5.203 | 0.03851488 |           |        |            |
| NEFH        | -4.351 | 0.03851488 |           |        |            |
| PJA1        | -3.579 | 0.03851488 |           |        |            |
| ABCF2       | -3.278 | 0.03851488 |           |        |            |
| ZBTB16      | -3.167 | 0.03851488 |           |        |            |
| CECR1       | 2.084  | 0.03853105 |           |        |            |
| CDR2L       | -3.807 | 0.03867211 |           |        |            |
| C11orf57    | -5.896 | 0.03881591 |           |        |            |
| IMMP2L      | -4.730 | 0.03902809 |           |        |            |
| ZNF268      | -5.890 | 0.03911234 |           |        |            |
| ZNF32       | -6.869 | 0.03932437 |           |        |            |
| CXCR5       | -3.618 | 0.03932437 |           |        |            |
| GGCX        | -6.265 | 0.03932437 |           |        |            |
| VPS37B      | 4.986  | 0.0396556  |           |        |            |
| CNNM4       | -3.351 | 0.039665   |           |        |            |
| PSMD4       | -2.881 | 0.0397306  |           |        |            |
| NCOA4       | -3.176 | 0.04008165 |           |        |            |
| PES1        | -4.753 | 0.04022236 |           |        |            |
| ZNF280D     | -4.886 | 0.04026591 |           |        |            |
| PAWR        | 2.122  | 0.04042659 |           |        |            |
| ARL15       | -3.407 | 0.04066013 |           |        |            |
| SPESP1      | -3.229 | 0.04068074 |           |        |            |
| C10orf128   | -3.842 | 0.04075742 |           |        |            |
| NT5DC2      | -6.748 | 0.04085008 |           |        |            |

|            |        |            |
|------------|--------|------------|
| C2orf47    | -6.174 | 0.04089878 |
| MBTPS2     | -5.746 | 0.04092846 |
| KSR2       | 2.486  | 0.04101674 |
| ZFYVE28    | -5.788 | 0.04137138 |
| NPRL3      | -7.388 | 0.04146848 |
| C1orf216   | -4.520 | 0.04172923 |
| ZNF654     | 6.655  | 0.04195242 |
| IPO4       | -6.954 | 0.04205506 |
| MRPL13     | -3.376 | 0.04214316 |
| TCEAL3     | 4.486  | 0.04214316 |
| POLH       | -6.463 | 0.04214316 |
| RUFY1      | -5.962 | 0.04214316 |
| LONP1      | -5.576 | 0.04236047 |
| RNF214     | -4.638 | 0.04239888 |
| MTERF3     | -6.036 | 0.04239888 |
| PKIG       | 2.038  | 0.04247856 |
| KIAA1217   | 3.895  | 0.04247856 |
| SMCO4      | -6.081 | 0.04247856 |
| TNFRSF11A  | -1.524 | 0.04258275 |
| TLL4       | -4.789 | 0.04258275 |
| ZUFSP      | -7.195 | 0.04270792 |
| CHCHD4     | -8.119 | 0.04270792 |
| CEP97      | -6.173 | 0.04279257 |
| METTL3     | -7.333 | 0.04279257 |
| ZCCHC8     | 3.302  | 0.04279257 |
| ZNF91      | -3.154 | 0.04279257 |
| MFN1       | -5.794 | 0.04282924 |
| ZNF213-AS1 | -2.100 | 0.04282924 |
| SLC39A1    | -6.227 | 0.04282924 |
| SPATA20    | -4.371 | 0.04287145 |
| XKR8       | -3.556 | 0.04287145 |
| RRP9       | -5.316 | 0.04292925 |
| POC1A      | -2.970 | 0.04315077 |
| SNORD30    | 2.126  | 0.0435113  |
| SIL1       | -5.826 | 0.04352478 |
| ZEB2       | -5.836 | 0.04352478 |
| KCTD3      | 1.688  | 0.04352478 |
| SNORD45B   | -4.341 | 0.04352478 |
| RFX5       | -3.655 | 0.04372249 |
| MRPL15     | -5.670 | 0.04372249 |
| VPREB3     | 2.041  | 0.04372249 |
| MGAT4B     | -4.245 | 0.04387606 |
| CASP6      | -5.879 | 0.04391634 |
| WASL       | 4.726  | 0.04391634 |
| STIM1      | -5.237 | 0.04413546 |
| NCR3LG1    | -1.477 | 0.04424673 |
| PSTPIP2    | -3.138 | 0.0445669  |
| NANS       | -4.408 | 0.04457293 |
| WDR53      | -5.215 | 0.04457293 |
| ZNF131     | -4.331 | 0.04478808 |
| RP9P       | -3.345 | 0.04485765 |
| TMEM116    | 2.538  | 0.04498702 |
| ZBED5-AS1  | 4.687  | 0.04498702 |
| EXO5       | -4.390 | 0.04498702 |

|           |        |            |
|-----------|--------|------------|
| TXNRD2    | -3.907 | 0.04499883 |
| SEH1L     | -3.891 | 0.04499883 |
| RAD51     | -3.123 | 0.04549929 |
| ZNF304    | 2.511  | 0.04577932 |
| ENGASE    | 1.633  | 0.04628872 |
| DDX50     | 2.696  | 0.04628872 |
| SNORD70   | -3.520 | 0.04628872 |
| HRSP12    | -4.308 | 0.04628872 |
| GNL3      | -2.511 | 0.04636569 |
| ORAI3     | -2.669 | 0.04667789 |
| GIT1      | -5.830 | 0.0468962  |
| FBXL6     | -2.302 | 0.04689852 |
| UBA5      | -5.644 | 0.04689852 |
| FAM86FP   | -3.430 | 0.04689852 |
| CREBL2    | 3.325  | 0.04703236 |
| TWF1      | -6.876 | 0.04721999 |
| USF1      | -3.658 | 0.04728248 |
| RAB27B    | -2.590 | 0.04728386 |
| RWDD2B    | -5.643 | 0.04728386 |
| TMEM39B   | -5.749 | 0.04728386 |
| ANKEF1    | 1.775  | 0.04728386 |
| BCKDHB    | 5.231  | 0.04728386 |
| LINC01281 | -6.785 | 0.04728386 |
| CMTM8     | 3.494  | 0.04729898 |
| SRP54     | -3.093 | 0.0473392  |
| NCS1      | -3.546 | 0.04745119 |
| NAA50     | -3.670 | 0.04746709 |
| TMEM138   | -4.521 | 0.04761273 |
| RNU5B-1   | -4.387 | 0.04761273 |
| THUMPD3   | -4.714 | 0.04761273 |
| ACP1      | -2.797 | 0.04786615 |
| TBL3      | -5.392 | 0.04786615 |
| SLC25A32  | -3.925 | 0.04786615 |
| ANKS6     | -2.951 | 0.04787461 |
| BLMH      | -4.520 | 0.04787461 |
| TMX4      | 3.660  | 0.04801846 |
| ZBTB42    | 3.378  | 0.04801846 |
| KIAA1804  | -5.677 | 0.04801846 |
| SNORA23   | -3.406 | 0.04809907 |
| AHCY      | -3.082 | 0.04809907 |
| FAM153A   | 2.498  | 0.04812568 |
| ATF5      | -4.869 | 0.04812568 |
| USB1      | -5.331 | 0.04812568 |
| MRPS17    | -4.289 | 0.04812568 |
| SAMM50    | -6.229 | 0.04812568 |
| FAM186B   | -2.460 | 0.04846748 |
| AP3S2     | -2.630 | 0.04892887 |
| IQCK      | -5.011 | 0.04892887 |
| PPT1      | -3.355 | 0.04901946 |
| IKZF4     | -6.060 | 0.04914162 |
| GBP1      | 2.756  | 0.04941697 |
| CCDC91    | -4.293 | 0.04951071 |
| RPL7L1    | -3.633 | 0.0497343  |
| OPA3      | -6.325 | 0.04973941 |

SRGAP3

2.304

0.04986235

| Geneid      | logFC      | PValue     | FDR        |
|-------------|------------|------------|------------|
| LINC00861   | 10.6874596 | 1.22E-09   | 3.15E-06   |
| GPR65       | 10.5992148 | 4.15E-09   | 7.67E-06   |
| SNTB2       | 10.4366993 | 7.38E-08   | 7.96E-05   |
| GAB3        | 10.3640035 | 2.13E-07   | 0.00017268 |
| CD84        | 10.1083224 | 7.86E-11   | 2.55E-07   |
| TMEM63A     | 10.0314103 | 0.00020687 | 0.01300258 |
| ANXA5       | 9.65695069 | 3.60E-06   | 0.00119502 |
| GBP3        | 9.58178255 | 0.00061752 | 0.02536119 |
| LINC00649   | 9.32874175 | 1.42E-05   | 0.00280604 |
| NUDT22      | 9.13626196 | 0.00037791 | 0.01911393 |
| PIK3C3      | 9.1182173  | 0.00011218 | 0.00945404 |
| CDADC1      | 9.10160938 | 1.19E-05   | 0.00244065 |
| TIGIT       | 9.05126612 | 6.76E-08   | 7.96E-05   |
| PBXIP1      | 8.88325719 | 4.51E-05   | 0.00556405 |
| FAIM3       | 8.84237029 | 6.58E-06   | 0.00177387 |
| BDH2        | 8.82542907 | 1.10E-05   | 0.00241812 |
| ABCA5       | 8.81044863 | 3.78E-06   | 0.00119502 |
| TNFRSF10A   | 8.79663001 | 0.00099347 | 0.03332503 |
| SNX30       | 8.79194632 | 0.00104277 | 0.03444332 |
| MAP3K5      | 8.77570736 | 0.00161001 | 0.04464081 |
| DUSP16      | 8.74685379 | 0.00118229 | 0.03724632 |
| FLJ21408    | 8.73517813 | 5.25E-05   | 0.00596635 |
| WWC3        | 8.73008626 | 0.00036891 | 0.0189144  |
| CARD14      | 8.71941979 | 1.51E-05   | 0.0028343  |
| VIPR1       | 8.62040815 | 9.70E-07   | 0.00052357 |
| TRIB2       | 8.60411598 | 7.14E-05   | 0.00708686 |
| HIVEP2      | 8.58499945 | 1.95E-07   | 0.0001686  |
| ZFYVE16     | 8.5738918  | 1.05E-07   | 0.00010427 |
| ACAD8       | 8.48328071 | 3.08E-05   | 0.00463008 |
| MIAT        | 8.45735698 | 0.00012831 | 0.01012995 |
| AK3         | 8.27613341 | 0.00010302 | 0.00905441 |
| PTK2        | 8.27578674 | 2.61E-07   | 0.00019146 |
| SAMD9       | 8.25498307 | 8.16E-06   | 0.00197037 |
| DEF6        | 8.12613306 | 0.00177069 | 0.04746768 |
| LOC10013047 | 8.08956405 | 0.00042284 | 0.02081709 |
| CYTH4       | 8.08190286 | 1.97E-05   | 0.00344168 |
| CTNNA1      | 7.93545294 | 1.23E-05   | 0.00248546 |
| HSD17B7P2   | 7.88731773 | 0.00074002 | 0.0281522  |
| ZFP36       | 7.85446034 | 4.07E-06   | 0.00122629 |
| CAPRIN2     | 7.81657961 | 5.44E-05   | 0.00612722 |
| RGS2        | 7.81244102 | 0.00148137 | 0.04296998 |
| KBTBD2      | 7.7744778  | 8.01E-06   | 0.00197037 |
| KLF3        | 7.75239898 | 0.00014853 | 0.01115813 |
| PRKD3       | 7.74620344 | 0.00044882 | 0.02152327 |
| MICAL1      | 7.66468286 | 0.00014299 | 0.01095516 |



|          |            |            |            |
|----------|------------|------------|------------|
| BCL6     | 7.62801642 | 0.00054104 | 0.02358735 |
| MORC3    | 7.51999113 | 3.52E-06   | 0.00119502 |
| TNFSF13B | 7.47954479 | 0.00014041 | 0.01085328 |
| ZNF484   | 7.33480028 | 0.00026436 | 0.01540558 |
| LDLRAP1  | 7.31776903 | 0.00061163 | 0.02530156 |
| CEP70    | 7.30673125 | 0.00030827 | 0.01691325 |
| RASAL3   | 7.28581416 | 0.00094033 | 0.03246759 |
| TAPT1    | 7.21244912 | 0.00076966 | 0.02855366 |
| CCR6     | 7.20989887 | 4.31E-05   | 0.00543218 |
| BEX2     | 7.19802413 | 0.00016056 | 0.01132216 |
| CCPG1    | 7.1445233  | 0.00127243 | 0.039415   |
| SLC2A3   | 7.06899629 | 1.75E-05   | 0.00314013 |
| CD58     | 7.05691566 | 3.44E-05   | 0.00489048 |
| ZNF665   | 7.01437748 | 4.61E-05   | 0.00563464 |
| FZD3     | 6.98651051 | 0.00065548 | 0.02608202 |
| PARP8    | 6.97309832 | 8.82E-06   | 0.0020382  |
| A2M      | 6.96922357 | 0.0003106  | 0.01696897 |
| LAX1     | 6.90280294 | 0.00027558 | 0.01558164 |
| PTGER2   | 6.89300514 | 2.08E-05   | 0.0035913  |
| ZNF200   | 6.86743929 | 0.00011682 | 0.00969588 |
| CAMK2N1  | 6.86412251 | 0.00161475 | 0.04467461 |
| MYBL1    | 6.85284713 | 0.00178567 | 0.04750648 |
| EGR3     | 6.84885795 | 0.00039336 | 0.01981781 |
| MAL      | 6.83181351 | 0.00098785 | 0.03330958 |
| TRPV2    | 6.82473972 | 0.0008261  | 0.02954802 |
| PIK3R1   | 6.78194531 | 5.32E-06   | 0.00149782 |
| PMS1     | 6.76920731 | 0.00061674 | 0.02536119 |
| ZNF815P  | 6.60650313 | 0.00153504 | 0.04377902 |
| PCED1B   | 6.58126308 | 0.00187567 | 0.0490629  |
| PTPN12   | 6.56114873 | 0.00025444 | 0.01490725 |
| LGALS3   | 6.56077823 | 1.46E-05   | 0.00280604 |
| RASGRF2  | 6.54273094 | 0.00049296 | 0.02252589 |
| KLHDC2   | 6.53152916 | 0.00084052 | 0.02989863 |
| NIN      | 6.50179968 | 0.0002114  | 0.01306368 |
| TCP11L2  | 6.44280683 | 0.00091598 | 0.03188214 |
| SAMD9L   | 6.41708573 | 0.00023778 | 0.01418809 |
| EPB41L5  | 6.37794031 | 3.72E-05   | 0.00501325 |
| RARS2    | 6.30219001 | 8.37E-05   | 0.00791052 |
| CAPN2    | 6.2949013  | 1.86E-06   | 0.0007771  |
| ALKBH4   | 6.21458392 | 0.00045235 | 0.02156324 |
| CEP85L   | 6.19502912 | 0.00053029 | 0.02341778 |
| RCBTB2   | 6.19494759 | 0.00043426 | 0.02105938 |
| RNF125   | 6.07619575 | 0.00045656 | 0.02165384 |
| SELM     | 6.07244785 | 0.00138765 | 0.04102114 |
| PAX8-AS1 | 6.04644552 | 0.00129176 | 0.03972852 |
| PPP3CA   | 5.95546773 | 0.0017042  | 0.04616309 |

|             |            |            |            |
|-------------|------------|------------|------------|
| LIMA1       | 5.90548843 | 5.94E-05   | 0.00646252 |
| ERP27       | 5.84857254 | 0.00049544 | 0.02252589 |
| GLIPR2      | 5.82155341 | 0.00029845 | 0.01644384 |
| IFT80       | 5.78930179 | 4.60E-06   | 0.0013272  |
| GOLGA8A     | 5.78600524 | 4.68E-05   | 0.00566601 |
| IL10RA      | 5.75631696 | 0.00128939 | 0.03972852 |
| LOC10192911 | 5.73752709 | 0.00109068 | 0.03531919 |
| EPG5        | 5.70861477 | 0.00074359 | 0.0281522  |
| PCED1B-AS1  | 5.68007918 | 3.48E-07   | 0.00021461 |
| PIK3IP1     | 5.65398844 | 0.0001609  | 0.01132216 |
| FAM153B     | 5.55398511 | 0.00133492 | 0.0404789  |
| GOLGA8B     | 5.53435435 | 7.59E-05   | 0.00739278 |
| RABGAP1L    | 5.52889668 | 2.79E-05   | 0.00435723 |
| FBXO3       | 5.51802465 | 0.00015225 | 0.0113043  |
| SYNE2       | 5.44940411 | 1.05E-06   | 0.00054254 |
| ATM         | 5.4281526  | 0.00055985 | 0.02417257 |
| SLC48A1     | 5.42025034 | 0.00079522 | 0.02896637 |
| LY96        | 5.35368511 | 0.00169613 | 0.04608744 |
| TNKS2       | 5.34713175 | 0.00044044 | 0.02119993 |
| ADD3        | 5.30072007 | 0.00033594 | 0.01776201 |
| ERAP2       | 5.28641152 | 4.08E-05   | 0.00527745 |
| ZNF169      | 5.2862523  | 0.00162222 | 0.0447424  |
| ATP2B4      | 5.27513068 | 0.00131859 | 0.04017191 |
| DSTYK       | 5.23690828 | 0.00130496 | 0.03985746 |
| UTRN        | 5.22493316 | 0.00070727 | 0.02741832 |
| SLFN5       | 5.1907267  | 0.00087251 | 0.03056644 |
| RUFY3       | 5.11080358 | 0.00073858 | 0.0281522  |
| PARP4       | 5.07908461 | 0.00098992 | 0.03330958 |
| VCPIP1      | 5.07267803 | 0.00145694 | 0.04267989 |
| EPHA4       | 5.05763933 | 0.00156306 | 0.04411177 |
| LOC284581   | 5.01354166 | 0.00134217 | 0.04057686 |
| NFATC1      | 5.00018759 | 0.00053555 | 0.02342688 |
| STK38       | 5.00002352 | 0.00095947 | 0.03304048 |
| CORO2A      | 4.94542024 | 6.13E-05   | 0.00656364 |
| ZNF652      | 4.92947845 | 0.00017003 | 0.01146624 |
| ATXN7L1     | 4.92397805 | 0.0008451  | 0.0299792  |
| NEAT1       | 4.90722136 | 1.64E-05   | 0.00299979 |
| WDR27       | 4.87735645 | 0.00049257 | 0.02252589 |
| MLKL        | 4.875153   | 0.00171096 | 0.04622079 |
| KIAA1551    | 4.77883741 | 0.00166177 | 0.04548952 |
| EPM2AIP1    | 4.71636939 | 0.00113764 | 0.03646081 |
| ZFP36L2     | 4.65409864 | 0.00081153 | 0.02918819 |
| MAP2K5      | 4.62114564 | 0.00188439 | 0.04917628 |
| CCDC69      | 4.61351159 | 0.00099044 | 0.03330958 |
| DSCR3       | 4.58186671 | 0.00193739 | 0.04957568 |
| SIRT3       | 4.48225293 | 0.00080371 | 0.02906833 |

|          |            |            |            |
|----------|------------|------------|------------|
| SLAMF6   | 4.47405259 | 0.00010765 | 0.00929196 |
| ZNF292   | 4.45413604 | 0.00011084 | 0.00944179 |
| NR4A2    | 4.42408359 | 0.00178858 | 0.04750648 |
| CXCR4    | 4.4091714  | 0.00059525 | 0.02504958 |
| TRANK1   | 4.40356501 | 0.00051806 | 0.02321067 |
| MAF      | 4.32285205 | 0.00053173 | 0.02341778 |
| IL16     | 4.27680261 | 0.0010124  | 0.03361172 |
| PNRC1    | 4.24576885 | 0.00060947 | 0.02530156 |
| FOS      | 4.12149208 | 0.00075295 | 0.02820651 |
| KLF3-AS1 | 4.11393696 | 0.000986   | 0.03330958 |
| CLK1     | 4.02460152 | 0.0006629  | 0.02624856 |
| ZNF204P  | 4.02027847 | 0.00011244 | 0.00945404 |
| CARD8    | 4.01978037 | 0.0002979  | 0.01644384 |
| USP47    | 3.97193335 | 0.00093062 | 0.03221827 |
| DGKA     | 3.9667477  | 0.00140612 | 0.04147266 |
| FYN      | 3.92967966 | 0.00080906 | 0.02918014 |
| ZFP90    | 3.77019103 | 0.0010519  | 0.03456852 |
| JMJD1C   | 3.7446628  | 0.00149965 | 0.04334263 |
| PRMT2    | 3.7199548  | 0.00098833 | 0.03330958 |
| EML4     | 3.67513618 | 0.00022205 | 0.0134351  |
| ATF7IP   | 3.65238082 | 0.00169785 | 0.04608744 |
| TNFAIP3  | 3.56266185 | 0.00057168 | 0.02434758 |
| FRYL     | 3.49544251 | 0.00130519 | 0.03985746 |
| NR4A1    | 3.47185195 | 4.79E-05   | 0.00567934 |
| ZC3H13   | 3.41490663 | 0.00136898 | 0.04097989 |
| 06-Sep   | 3.28044793 | 0.00069144 | 0.02699654 |
| N4BP2L2  | 3.26815081 | 0.00047309 | 0.02201373 |
| IL10     | 3.24227711 | 7.17E-05   | 0.00708686 |
| PAICS    | -3.0430302 | 0.00179048 | 0.04750648 |
| TXLNA    | -3.2065679 | 0.00189876 | 0.04919415 |
| PSMD14   | -3.2462751 | 0.00098524 | 0.03330958 |
| ABCE1    | -3.2488837 | 0.00112835 | 0.03625268 |
| GNL3     | -3.3889489 | 0.00142334 | 0.04188496 |
| PSME2    | -3.4027081 | 0.00077927 | 0.0286386  |
| TRAP1    | -3.5777089 | 0.00167006 | 0.04562007 |
| IL22     | -3.5822574 | 0.00071967 | 0.02780719 |
| SNHG3    | -3.6133408 | 0.00063154 | 0.02571441 |
| STIP1    | -3.6434604 | 0.0007216  | 0.02780719 |
| ADSL     | -3.6581479 | 0.00078077 | 0.0286386  |
| TCP1     | -3.7886368 | 0.00027864 | 0.01565333 |
| MIR155HG | -3.8988371 | 0.00019205 | 0.01243347 |
| UBE2L6   | -3.9108545 | 0.00052867 | 0.02341778 |
| CSF2     | -3.9783398 | 0.00037241 | 0.01892024 |
| C2orf44  | -4.0308038 | 0.00026965 | 0.01547473 |
| VDAC1    | -4.0452833 | 0.00032308 | 0.01742994 |
| IRF4     | -4.0528099 | 0.00059974 | 0.02504958 |

|          |            |            |            |
|----------|------------|------------|------------|
| FABP5    | -4.1278375 | 0.00016382 | 0.01138557 |
| PTCD3    | -4.2888895 | 0.00015806 | 0.01130711 |
| MYC      | -4.2894624 | 0.00014909 | 0.01115813 |
| FKRP     | -4.3070428 | 0.00089264 | 0.03115323 |
| DDB1     | -4.3922217 | 0.00077057 | 0.02855366 |
| NDUFS2   | -4.4069214 | 0.00076669 | 0.02855366 |
| DCLRE1B  | -4.454423  | 0.0019079  | 0.04927315 |
| SS18     | -4.4854282 | 0.00192124 | 0.04927315 |
| TSN      | -4.511505  | 0.00035627 | 0.01869065 |
| EMG1     | -4.5449078 | 0.0017222  | 0.04635987 |
| DDX1     | -4.555247  | 6.99E-05   | 0.00708686 |
| CKAP5    | -4.5866748 | 0.00023284 | 0.01395715 |
| WARS     | -4.6075182 | 2.04E-06   | 0.00082631 |
| MRPL39   | -4.6593805 | 0.0010917  | 0.03531919 |
| PHGDH    | -4.6739255 | 0.00189968 | 0.04919415 |
| CYB5B    | -4.7444228 | 0.00047495 | 0.02201373 |
| ALKBH3   | -4.747688  | 0.00137164 | 0.04097989 |
| MRPL49   | -4.7857963 | 0.00148276 | 0.04296998 |
| C15orf41 | -4.8074904 | 0.00115757 | 0.03680377 |
| ATP5SL   | -4.8135845 | 0.00150337 | 0.04335317 |
| ZNF195   | -4.8832121 | 0.0004195  | 0.02073159 |
| TUBG1    | -4.9176042 | 0.00156697 | 0.04411177 |
| CSNK2A1  | -4.9318079 | 0.00064353 | 0.02581136 |
| TBCK     | -4.9645261 | 0.00178301 | 0.04750648 |
| GGCT     | -4.9970076 | 0.00192176 | 0.04927315 |
| PSMD13   | -5.1152991 | 0.00014082 | 0.01085328 |
| TTK      | -5.1285379 | 0.00124914 | 0.03887932 |
| FAM206A  | -5.1309392 | 0.00041636 | 0.02065535 |
| FANCA    | -5.1594042 | 0.00157396 | 0.04411177 |
| GRPEL1   | -5.1987188 | 0.00047605 | 0.02201373 |
| WDR75    | -5.2037455 | 7.72E-05   | 0.0074565  |
| ZNF25    | -5.2068196 | 0.00068538 | 0.02697344 |
| EMC4     | -5.2134559 | 0.00075043 | 0.02820651 |
| CDK10    | -5.229499  | 0.00164086 | 0.04510793 |
| COPG1    | -5.2305776 | 0.0018914  | 0.04917628 |
| GMFB     | -5.2399564 | 0.00134441 | 0.04057686 |
| RPAIN    | -5.2426763 | 0.00152964 | 0.04373416 |
| MCM3     | -5.2489633 | 6.83E-06   | 0.00180457 |
| TIMELESS | -5.2625585 | 0.00020271 | 0.0128664  |
| MEAF6    | -5.2659448 | 5.78E-05   | 0.00634103 |
| CRKL     | -5.3272466 | 0.00010419 | 0.00905441 |
| FAM136A  | -5.3445855 | 0.00049756 | 0.02252589 |
| CDK6     | -5.3547298 | 5.25E-05   | 0.00596635 |
| ERCC8    | -5.4479278 | 0.00027183 | 0.01547473 |
| PAK1IP1  | -5.4658913 | 8.61E-05   | 0.0079667  |
| MRPL42   | -5.4672575 | 0.00164505 | 0.04512731 |

|         |            |            |            |
|---------|------------|------------|------------|
| WDR3    | -5.4728319 | 0.00150793 | 0.04338806 |
| TIMM23  | -5.5181894 | 3.13E-05   | 0.00466242 |
| MED7    | -5.5207877 | 0.00162411 | 0.0447424  |
| MTCH2   | -5.5768509 | 7.26E-05   | 0.00712415 |
| NOP2    | -5.5772446 | 0.00021389 | 0.01306368 |
| EXOC2   | -5.588926  | 0.00148344 | 0.04296998 |
| BAG4    | -5.5999141 | 3.56E-05   | 0.00496061 |
| METTL5  | -5.6177555 | 4.87E-05   | 0.00567934 |
| LZTR1   | -5.6232377 | 0.00036243 | 0.01889091 |
| NUP205  | -5.6352899 | 0.0001176  | 0.00969887 |
| IDH3A   | -5.6632642 | 2.24E-06   | 0.00088054 |
| ASNS    | -5.6884638 | 8.95E-05   | 0.00815959 |
| NAT10   | -5.7142966 | 0.00015777 | 0.01130711 |
| GFM1    | -5.7385507 | 0.00056308 | 0.02422183 |
| POLR2D  | -5.7437869 | 0.00107447 | 0.03522074 |
| SLC5A6  | -5.7528734 | 0.00020503 | 0.0129501  |
| COMMD9  | -5.7537947 | 0.00171347 | 0.04622079 |
| GOLT1B  | -5.7542811 | 1.63E-05   | 0.00299979 |
| NDUFA9  | -5.7667873 | 0.00039873 | 0.02001074 |
| KRR1    | -5.767012  | 0.00069222 | 0.02699654 |
| PNP     | -5.7819119 | 0.00077405 | 0.02855366 |
| LTA4H   | -5.8034188 | 0.00012052 | 0.00987683 |
| EIF4A3  | -5.8192162 | 0.00188952 | 0.04917628 |
| RNF6    | -5.8371431 | 0.0010934  | 0.03531919 |
| PRMT1   | -5.8422149 | 3.94E-05   | 0.00520551 |
| ZNF146  | -5.8522406 | 0.00036958 | 0.0189144  |
| UBE2E3  | -5.8651613 | 3.94E-05   | 0.00520551 |
| PALB2   | -5.8678052 | 0.00057353 | 0.02434758 |
| MMGT1   | -5.8788724 | 0.00154073 | 0.04384488 |
| SLC43A3 | -5.8854552 | 3.35E-05   | 0.00487078 |
| RAD54L  | -5.885853  | 0.00156769 | 0.04411177 |
| KRBOX4  | -5.8962095 | 0.001778   | 0.04750648 |
| PRDX3   | -5.9176293 | 2.44E-06   | 0.00090347 |
| FANCG   | -5.9286526 | 0.00153009 | 0.04373416 |
| ELAC1   | -5.9449974 | 0.00070142 | 0.02727304 |
| CARKD   | -5.9472598 | 0.00158243 | 0.04415801 |
| MSH2    | -5.9552453 | 2.98E-05   | 0.00454658 |
| PRPS1   | -5.9594098 | 0.00062709 | 0.02561373 |
| AP1M1   | -5.9618123 | 0.00104985 | 0.03456852 |
| VWA9    | -5.9720309 | 0.00134865 | 0.04060996 |
| UQC3    | -5.9957624 | 0.00155436 | 0.04411177 |
| CHEK1   | -6.0030796 | 0.00146128 | 0.04271039 |
| POP4    | -6.0079763 | 0.00036797 | 0.0189144  |
| PHF14   | -6.0317664 | 0.00040431 | 0.02021242 |
| SNX27   | -6.0595737 | 3.31E-05   | 0.00487078 |
| IPO4    | -6.060653  | 0.00109406 | 0.03531919 |

|         |            |            |            |
|---------|------------|------------|------------|
| MCM7    | -6.0624917 | 7.16E-05   | 0.00708686 |
| ZGRF1   | -6.0673118 | 0.00075096 | 0.02820651 |
| PPP2R1B | -6.0818198 | 0.0017413  | 0.04677663 |
| CPPED1  | -6.0942388 | 0.00096923 | 0.03328808 |
| DDX56   | -6.1165996 | 0.00019322 | 0.01244698 |
| BLMH    | -6.1558471 | 0.00092269 | 0.03202954 |
| ECHDC1  | -6.1639245 | 0.00025229 | 0.01490725 |
| SIRT7   | -6.1664945 | 0.00191257 | 0.04927315 |
| YIPF2   | -6.1781952 | 0.00184289 | 0.04841719 |
| ZNF766  | -6.1790873 | 6.63E-05   | 0.00686441 |
| PTGER4  | -6.1909301 | 0.00075374 | 0.02820651 |
| MFSD2A  | -6.2312278 | 0.00157338 | 0.04411177 |
| TXNL1   | -6.2442243 | 1.83E-05   | 0.00325269 |
| NUP85   | -6.2680386 | 6.60E-05   | 0.00686441 |
| TMEM41A | -6.2763563 | 0.00138363 | 0.04102114 |
| POLDIP3 | -6.2817716 | 0.00103023 | 0.0341163  |
| HACD3   | -6.288543  | 0.00124574 | 0.03886721 |
| VAMP5   | -6.3182594 | 0.00080221 | 0.02906833 |
| RBM18   | -6.3224708 | 0.00123127 | 0.03856018 |
| CRYZ    | -6.3370167 | 0.00125911 | 0.03909587 |
| HAUS7   | -6.3534708 | 0.00016049 | 0.01132216 |
| MCM5    | -6.3583985 | 4.61E-06   | 0.0013272  |
| TMEM97  | -6.3593253 | 0.00161008 | 0.04464081 |
| MRPL46  | -6.3645488 | 0.00079642 | 0.02896637 |
| USP38   | -6.3719755 | 0.00129491 | 0.0397309  |
| NLRC5   | -6.3795651 | 0.00015492 | 0.0113043  |
| ATG4B   | -6.3874989 | 0.00115209 | 0.03680377 |
| SLC50A1 | -6.4146976 | 1.47E-05   | 0.00280604 |
| FBXO6   | -6.4276053 | 0.00136233 | 0.04092685 |
| RNASEH1 | -6.4503175 | 0.00087346 | 0.03056644 |
| CENPW   | -6.4559628 | 0.00100949 | 0.03360134 |
| RIC3    | -6.4598795 | 0.00041565 | 0.02065535 |
| MLEC    | -6.4619051 | 0.00022721 | 0.01368307 |
| FAM168A | -6.4981825 | 0.00100317 | 0.03347682 |
| TRIM5   | -6.5006404 | 0.00108262 | 0.03531919 |
| IFT57   | -6.5327379 | 0.00056627 | 0.0242783  |
| URGCP   | -6.536633  | 0.00087225 | 0.03056644 |
| BRCA1   | -6.5375365 | 0.00097284 | 0.03330958 |
| RNF114  | -6.5448015 | 0.00138298 | 0.04102114 |
| DPM2    | -6.5448774 | 9.98E-05   | 0.00885287 |
| DPH2    | -6.6053323 | 9.58E-05   | 0.00855819 |
| POFUT1  | -6.6102901 | 0.00033609 | 0.01776201 |
| THOC6   | -6.6103853 | 0.00021336 | 0.01306368 |
| E2F4    | -6.6150591 | 0.00065668 | 0.02608202 |
| PNPO    | -6.6302904 | 1.17E-05   | 0.00244065 |
| TIPIN   | -6.6448662 | 0.00012782 | 0.01012995 |

|         |            |            |            |
|---------|------------|------------|------------|
| FAM213A | -6.6449725 | 0.00123293 | 0.03856018 |
| MLH1    | -6.6640362 | 0.00026873 | 0.01547473 |
| KNTC1   | -6.6662121 | 7.20E-06   | 0.00186496 |
| AGPAT5  | -6.667877  | 0.00132276 | 0.04020449 |
| GUCD1   | -6.6798077 | 6.78E-05   | 0.00696878 |
| UBE2O   | -6.6880654 | 0.00157865 | 0.04414774 |
| PPME1   | -6.6883756 | 0.00013532 | 0.01061912 |
| EIF2B3  | -6.6957372 | 0.0002473  | 0.01468801 |
| UBE2C   | -6.7123452 | 0.0006881  | 0.02699654 |
| C5orf22 | -6.7178277 | 0.00027249 | 0.01547473 |
| EIF4E2  | -6.7207135 | 2.69E-05   | 0.00425462 |
| UBLCP1  | -6.7398297 | 0.00033062 | 0.01768941 |
| UTP20   | -6.7574759 | 6.52E-05   | 0.00686408 |
| RNF8    | -6.775428  | 0.0012133  | 0.03813073 |
| NSMCE2  | -6.7809823 | 0.0018298  | 0.04825309 |
| NUP155  | -6.7885006 | 0.00151509 | 0.04349748 |
| PNO1    | -6.8099301 | 0.00018523 | 0.01215711 |
| POLDIP2 | -6.8170202 | 0.00043246 | 0.0210506  |
| FTSJ2   | -6.8217999 | 0.0010889  | 0.03531919 |
| CHAC2   | -6.8292492 | 0.00036329 | 0.01889091 |
| USP32   | -6.8725301 | 4.03E-05   | 0.00527366 |
| APIP    | -6.8787203 | 0.00179827 | 0.04761554 |
| PSMD9   | -6.8956548 | 0.00042818 | 0.02094706 |
| MSH6    | -6.9083733 | 7.09E-07   | 0.00039906 |
| IDH3G   | -6.912305  | 0.00015504 | 0.0113043  |
| RNGTT   | -6.9163154 | 0.0001978  | 0.01261631 |
| CD2BP2  | -6.9166718 | 0.00086631 | 0.03056395 |
| SNORA70 | -6.9400629 | 0.00045298 | 0.02156324 |
| CHMP5   | -6.9675344 | 4.32E-05   | 0.00543218 |
| SIRT2   | -6.9804322 | 7.99E-05   | 0.00760878 |
| DHFR    | -6.9900443 | 0.00052739 | 0.02341778 |
| NMD3    | -6.9904258 | 2.18E-05   | 0.00366737 |
| MRPS33  | -6.9964458 | 1.50E-06   | 0.0006914  |
| FAM86C1 | -7.0027711 | 0.00187227 | 0.0490629  |
| LAP3    | -7.0054476 | 0.00016573 | 0.01138557 |
| ALKBH1  | -7.0210255 | 0.00021157 | 0.01306368 |
| HSD17B4 | -7.0289637 | 0.00011043 | 0.00944179 |
| GLE1    | -7.0345562 | 0.00145279 | 0.04265469 |
| TSEN15  | -7.0365294 | 0.00026533 | 0.01540558 |
| CDC20   | -7.0474292 | 0.00055585 | 0.02415148 |
| PPP5C   | -7.0679398 | 0.00029581 | 0.0164383  |
| CYB5R4  | -7.0857672 | 0.00180338 | 0.04765344 |
| RPL26L1 | -7.086988  | 0.00016916 | 0.01146624 |
| BLM     | -7.0880985 | 0.0007343  | 0.02812942 |
| EARS2   | -7.1086433 | 0.00031699 | 0.01723318 |
| C2orf47 | -7.1387198 | 0.00063809 | 0.02581136 |

|           |            |            |            |
|-----------|------------|------------|------------|
| MREG      | -7.1460383 | 0.00128975 | 0.03972852 |
| NAB2      | -7.1664196 | 0.00083636 | 0.02983229 |
| TMEM179B  | -7.1892937 | 0.00037262 | 0.01892024 |
| RPA1      | -7.2022287 | 0.00015543 | 0.0113043  |
| GIN53     | -7.2216268 | 0.00036788 | 0.0189144  |
| UHRF1     | -7.2273569 | 0.00042871 | 0.02094706 |
| ATAD5     | -7.2373119 | 9.41E-05   | 0.00845916 |
| KIF3B     | -7.2496446 | 0.00059832 | 0.02504958 |
| APTX      | -7.2509988 | 7.93E-05   | 0.00760735 |
| STAG3L4   | -7.2521414 | 0.00138486 | 0.04102114 |
| DHX30     | -7.2611572 | 0.00064465 | 0.02581136 |
| RINT1     | -7.3504583 | 0.00012284 | 0.01000358 |
| SLC31A1   | -7.3591864 | 0.00011598 | 0.00968869 |
| FEM1A     | -7.3624767 | 1.03E-05   | 0.00230604 |
| ETAA1     | -7.3637171 | 0.0018435  | 0.04841719 |
| COMMD1    | -7.364427  | 0.00064588 | 0.02581136 |
| DDX19A    | -7.3766525 | 0.0001671  | 0.01138726 |
| CYB561D2  | -7.3871657 | 3.39E-05   | 0.00487078 |
| C5orf28   | -7.390573  | 0.00158784 | 0.04421354 |
| TRMT1     | -7.3947814 | 0.00014631 | 0.01107841 |
| DGCR14    | -7.4044129 | 0.00192007 | 0.04927315 |
| MCM10     | -7.4161455 | 2.52E-05   | 0.00408192 |
| PRPF3     | -7.4185396 | 0.00077234 | 0.02855366 |
| HSPA13    | -7.4285544 | 2.59E-05   | 0.00414185 |
| ZWINT     | -7.4318649 | 0.00100194 | 0.03347682 |
| VRK1      | -7.4324938 | 3.69E-05   | 0.00501325 |
| CSTF2     | -7.4374468 | 0.00115544 | 0.03680377 |
| IFRD2     | -7.4529941 | 0.00156877 | 0.04411177 |
| TIMM9     | -7.4672219 | 0.00046679 | 0.02189871 |
| EDC3      | -7.4676218 | 0.00146696 | 0.04277974 |
| DDHD1     | -7.4706964 | 0.00012621 | 0.01008722 |
| SLC39A14  | -7.4711753 | 0.00057305 | 0.02434758 |
| WRAP53    | -7.4716575 | 0.00056007 | 0.02417257 |
| DNAJC9    | -7.4791847 | 8.49E-06   | 0.00199944 |
| PPP1R8    | -7.4936567 | 0.00115971 | 0.03680377 |
| CEP89     | -7.4952952 | 0.00043629 | 0.02107874 |
| HN1L      | -7.5043636 | 3.65E-05   | 0.00501325 |
| DUS1L     | -7.5195772 | 0.00014411 | 0.01097573 |
| SCFD2     | -7.5285424 | 8.51E-05   | 0.00794155 |
| CD83      | -7.5288063 | 0.00027927 | 0.01565333 |
| TTC26     | -7.5471622 | 0.00098953 | 0.03330958 |
| COPS2     | -7.5575981 | 6.44E-05   | 0.00683353 |
| CKS1B     | -7.5854414 | 0.00059604 | 0.02504958 |
| PIGN      | -7.5967474 | 0.0016937  | 0.04608744 |
| RAB30-AS1 | -7.5997658 | 0.00033277 | 0.01773145 |
| NR6A1     | -7.6175877 | 0.00035655 | 0.01869065 |



|          |            |            |            |
|----------|------------|------------|------------|
| MCEE     | -7.6251449 | 0.00018591 | 0.01215711 |
| POLB     | -7.6255234 | 8.53E-05   | 0.00794155 |
| WDR55    | -7.633499  | 0.00012506 | 0.0100574  |
| CDCA7    | -7.6422049 | 0.00021002 | 0.01306368 |
| UCK2     | -7.6454517 | 0.00064093 | 0.02581136 |
| GPS1     | -7.6473682 | 0.00019532 | 0.01251986 |
| KIAA0753 | -7.6482242 | 0.00047892 | 0.0220678  |
| PGP      | -7.657819  | 0.00072677 | 0.02792349 |
| FOXRED2  | -7.6760928 | 0.00078335 | 0.02865193 |
| POLR1B   | -7.6809692 | 7.69E-06   | 0.00195194 |
| PSMD2    | -7.6837984 | 9.16E-06   | 0.0020805  |
| TRAPPC11 | -7.7053447 | 0.00074156 | 0.0281522  |
| DBR1     | -7.7139147 | 0.00064558 | 0.02581136 |
| PIK3R4   | -7.7161851 | 2.66E-07   | 0.00019146 |
| ALKBH8   | -7.7216374 | 0.0005264  | 0.02341778 |
| BPGM     | -7.7665819 | 8.78E-05   | 0.00806044 |
| IFI35    | -7.7991637 | 7.10E-05   | 0.00708686 |
| GTF2H3   | -7.8020512 | 0.00053396 | 0.02342688 |
| NSDHL    | -7.8088949 | 0.00021384 | 0.01306368 |
| PRKAB2   | -7.8115749 | 0.00017924 | 0.01190129 |
| ADAL     | -7.8188841 | 0.00049643 | 0.02252589 |
| NCOA5    | -7.8320561 | 2.52E-05   | 0.00408192 |
| PLGRKT   | -7.8383403 | 0.00013974 | 0.01085328 |
| CNDP2    | -7.8438201 | 0.00047082 | 0.02200766 |
| MMS22L   | -7.8552652 | 0.00027118 | 0.01547473 |
| PTGFRN   | -7.8658425 | 0.00058955 | 0.02494617 |
| AAAS     | -7.8708484 | 0.00061001 | 0.02530156 |
| SHMT2    | -7.8774944 | 1.25E-07   | 0.000116   |
| AHR      | -7.8992708 | 4.12E-08   | 5.93E-05   |
| TAF1A    | -7.9085982 | 5.54E-05   | 0.00618434 |
| BOP1     | -7.9158606 | 0.00081582 | 0.02926099 |
| PLEKHJ1  | -7.9243789 | 9.31E-05   | 0.00842924 |
| CXorf40B | -7.9323427 | 0.00017741 | 0.01184079 |
| WDR4     | -8.0036337 | 0.00016449 | 0.01138557 |
| NARS2    | -8.0073931 | 0.00116529 | 0.0368175  |
| MRPS15   | -8.0293961 | 0.0001039  | 0.00905441 |
| NSUN5    | -8.0338492 | 0.00012492 | 0.0100574  |
| OXSM     | -8.0397685 | 0.00109656 | 0.03531919 |
| R3HCC1   | -8.0553488 | 0.0003181  | 0.01723318 |
| MAPKAPK5 | -8.0590201 | 4.83E-05   | 0.00567934 |
| MPV17    | -8.0754733 | 0.00046297 | 0.02185799 |
| NUDT2    | -8.1030503 | 0.00137359 | 0.04097989 |
| ATP6V0A2 | -8.1129642 | 3.73E-06   | 0.00119502 |
| GINS2    | -8.1135552 | 0.00061895 | 0.02536119 |
| CHCHD1   | -8.124805  | 0.00016619 | 0.01138557 |
| BECN1    | -8.1322352 | 1.82E-06   | 0.0007771  |

|           |            |            |            |
|-----------|------------|------------|------------|
| DCTN4     | -8.158318  | 0.00018947 | 0.01232808 |
| RTTN      | -8.162248  | 0.00015628 | 0.0113043  |
| SLC29A1   | -8.1823046 | 1.18E-05   | 0.00244065 |
| CHID1     | -8.2103545 | 5.65E-05   | 0.00625139 |
| C11orf49  | -8.2124277 | 0.00116583 | 0.0368175  |
| CA5BP1    | -8.2244404 | 0.00046424 | 0.02185799 |
| AZI2      | -8.2305007 | 0.00016473 | 0.01138557 |
| RPARP-AS1 | -8.25623   | 0.00086601 | 0.03056395 |
| RNASEH2A  | -8.2577732 | 0.0003292  | 0.01768673 |
| DRG2      | -8.2641701 | 5.05E-05   | 0.00583329 |
| RBBP8     | -8.2778401 | 5.88E-08   | 7.61E-05   |
| LCMT1     | -8.3126051 | 4.06E-06   | 0.00122629 |
| PIGH      | -8.3293931 | 0.00021992 | 0.01336885 |
| SMARCA4   | -8.3296138 | 2.26E-05   | 0.00374736 |
| DNAJC11   | -8.352736  | 3.52E-05   | 0.00495885 |
| PYCR1     | -8.3763591 | 2.16E-05   | 0.00366737 |
| MEST      | -8.4080036 | 0.00017307 | 0.01161117 |
| FAM114A2  | -8.4381502 | 0.00051341 | 0.02316224 |
| CDC6      | -8.4481964 | 2.67E-06   | 0.00096098 |
| CNTROB    | -8.4571561 | 6.12E-05   | 0.00656364 |
| TIMM50    | -8.4603646 | 4.86E-05   | 0.00567934 |
| TMEM186   | -8.4787032 | 8.22E-06   | 0.00197037 |
| MRFAP1    | -8.4937292 | 1.30E-06   | 0.00062137 |
| COPS3     | -8.5002297 | 3.45E-08   | 5.59E-05   |
| CAD       | -8.5295791 | 1.70E-06   | 0.00076019 |
| DNAJC14   | -8.5711138 | 0.00029545 | 0.0164383  |
| TRMT10A   | -8.5769077 | 0.00018553 | 0.01215711 |
| ATG4C     | -8.6264607 | 4.47E-05   | 0.00556405 |
| RUVBL1    | -8.6534035 | 4.29E-07   | 0.00025264 |
| RFC5      | -8.6616918 | 1.16E-05   | 0.00244065 |
| SLC25A19  | -8.6975422 | 4.27E-05   | 0.00543218 |
| APOO      | -8.7409537 | 2.39E-06   | 0.00090347 |
| MCM2      | -8.7917614 | 6.40E-06   | 0.0017622  |
| EFTUD1    | -8.8248143 | 1.27E-06   | 0.00062137 |
| P2RX5     | -8.8746445 | 0.00025443 | 0.01490725 |
| GLA       | -8.9220305 | 1.44E-05   | 0.00280604 |
| UBA6-AS1  | -8.9379266 | 0.00067677 | 0.02671572 |
| METTL13   | -8.9507032 | 2.09E-09   | 4.51E-06   |
| COQ5      | -8.9676925 | 0.00015442 | 0.0113043  |
| TMEM184C  | -8.9767563 | 3.31E-07   | 0.00021441 |
| C12orf66  | -8.9839131 | 0.00051759 | 0.02321067 |
| MAD2L1    | -9.0540069 | 2.88E-06   | 0.0010092  |
| RABEPK    | -9.0761303 | 2.81E-07   | 0.00019146 |
| TRMU      | -9.2108054 | 2.91E-05   | 0.0044794  |
| PCNA      | -9.5559325 | 7.71E-11   | 2.55E-07   |
| NUDCD1    | -9.8370268 | 3.86E-12   | 2.50E-08   |

|       |            |          |          |
|-------|------------|----------|----------|
| PSAT1 | -10.286767 | 3.05E-13 | 3.94E-09 |
|-------|------------|----------|----------|

| GeneID   | logFC      | logCPM     | PValue     | FDR        |
|----------|------------|------------|------------|------------|
| C4orf29  | 9.63464179 | 6.28118147 | 5.45E-06   | 0.00203308 |
| PURA     | 9.54661386 | 6.49134931 | 8.64E-06   | 0.00247523 |
| BHLHE40  | 9.44714673 | 6.45217126 | 7.07E-10   | 2.04E-06   |
| GIMAP4   | 9.37788544 | 7.46186631 | 2.96E-07   | 0.00026289 |
| MON1B    | 9.09647784 | 5.80503201 | 8.63E-05   | 0.01049777 |
| FAAH2    | 9.07073584 | 5.80275057 | 0.00067954 | 0.03408827 |
| ZFP90    | 9.04101886 | 7.21382207 | 0.00077942 | 0.03643521 |
| CUEDC2   | 9.03023099 | 6.38325046 | 1.14E-06   | 0.00062595 |
| GAB3     | 8.99195978 | 7.7764498  | 0.00130541 | 0.04789411 |
| CISH     | 8.96513146 | 6.97087401 | 1.01E-10   | 1.17E-06   |
| ZSCAN29  | 8.94898836 | 4.86656069 | 4.29E-05   | 0.00660569 |
| DUSP7    | 8.94297698 | 6.73662205 | 1.46E-07   | 0.00018741 |
| MUM1     | 8.93625018 | 6.36165329 | 0.00015487 | 0.01491488 |
| URB1     | 8.9116657  | 5.77545284 | 1.26E-05   | 0.00322381 |
| GOSR2    | 8.84599594 | 5.21458777 | 1.11E-05   | 0.00292855 |
| C6orf106 | 8.8175748  | 7.3398782  | 5.34E-05   | 0.0077082  |
| HEATR5A  | 8.80215046 | 6.37915195 | 3.80E-06   | 0.00162598 |
| MMAB     | 8.78850742 | 5.59972129 | 2.42E-05   | 0.00474846 |
| PARP11   | 8.73014397 | 5.85132762 | 0.00012676 | 0.0136816  |
| AKAP1    | 8.71252331 | 5.25879166 | 0.00012457 | 0.01358193 |
| MAPK1    | 8.70267806 | 7.30077299 | 3.70E-05   | 0.00601662 |
| ZNF616   | 8.66016566 | 5.33532281 | 0.0005493  | 0.03071315 |
| GPR171   | 8.64342829 | 6.89812911 | 2.02E-10   | 1.17E-06   |
| NELL2    | 8.59851058 | 6.00488358 | 5.58E-05   | 0.00774311 |
| MAGED2   | 8.55835632 | 7.07307006 | 8.86E-07   | 0.00051188 |
| DCUN1D4  | 8.43297358 | 6.46499478 | 0.00027651 | 0.0214557  |
| DYNLL1   | 8.42714251 | 7.68649862 | 1.35E-09   | 3.13E-06   |
| TNFRSF4  | 8.42183101 | 4.99681915 | 8.05E-07   | 0.00049429 |
| ECHS1    | 8.38834911 | 7.0905359  | 0.00100501 | 0.04239024 |
| RINL     | 8.32651929 | 4.29938443 | 0.0002823  | 0.02160622 |
| TNFSF13B | 8.30269873 | 5.79890827 | 6.49E-08   | 0.00010707 |
| STAT6    | 8.28764013 | 6.42217335 | 3.19E-05   | 0.00542463 |
| RUFY3    | 8.27413864 | 6.41822121 | 4.85E-06   | 0.00196743 |
| ITGA4    | 8.2523139  | 8.13848581 | 3.20E-06   | 0.00142296 |
| TALDO1   | 8.25167992 | 6.66205006 | 5.37E-06   | 0.00203308 |
| ZNF518A  | 8.20887303 | 6.64519293 | 0.00074219 | 0.03573932 |
| SNX17    | 8.13518647 | 5.95453074 | 6.90E-06   | 0.00234477 |
| ACAD8    | 8.12525268 | 7.06849395 | 0.00035815 | 0.02465156 |
| ILVBL    | 8.10040841 | 3.06435624 | 3.53E-05   | 0.00582296 |
| STK3     | 8.07100869 | 3.99088517 | 4.04E-05   | 0.00639144 |
| DENND2D  | 8.06492896 | 7.5666623  | 0.00123308 | 0.04668928 |
| VEGFB    | 8.03169176 | 4.67926533 | 2.63E-05   | 0.00489929 |
| SUV420H1 | 8.01426397 | 6.96404984 | 0.00081161 | 0.03736972 |
| SELM     | 8.00291181 | 5.02281268 | 0.0002099  | 0.01823913 |
| GYS1     | 8.00034881 | 2.61987935 | 6.43E-06   | 0.00225161 |

|              |            |            |            |            |
|--------------|------------|------------|------------|------------|
| SRM          | 7.99495634 | 5.19771125 | 3.40E-07   | 0.00028067 |
| UTP14A       | 7.99386288 | 4.85133908 | 0.00132572 | 0.0482034  |
| ACVR2A       | 7.97566102 | 5.61331047 | 0.00074203 | 0.03573932 |
| LINC00324    | 7.95711561 | 4.67486868 | 0.00040223 | 0.02540987 |
| LMAN2L       | 7.8828259  | 4.87444525 | 7.51E-06   | 0.00238633 |
| C1GALT1C1    | 7.86218046 | 6.24423713 | 0.00014913 | 0.01460562 |
| HSD17B7P2    | 7.85459367 | 5.12679076 | 0.00103493 | 0.04287001 |
| SKIL         | 7.84780598 | 8.58632641 | 0.00014102 | 0.01410803 |
| ST6GAL1      | 7.8415068  | 8.10977376 | 7.29E-06   | 0.00238633 |
| AK3          | 7.82564135 | 5.33347857 | 0.00042512 | 0.02613346 |
| MPP1         | 7.82372623 | 3.16101138 | 0.00013363 | 0.01391266 |
| ADIPOR2      | 7.80720894 | 6.58673221 | 0.00042046 | 0.02598534 |
| ST7L         | 7.72926683 | 3.51075465 | 0.00023511 | 0.01968957 |
| GALE         | 7.72100159 | 5.84336994 | 1.93E-07   | 0.00022349 |
| TRAF3IP2-AS1 | 7.71795764 | 5.36411817 | 2.81E-05   | 0.00507139 |
| DDX58        | 7.71435636 | 6.84156021 | 2.11E-05   | 0.00450671 |
| PPRC1        | 7.70218274 | 6.66899495 | 9.77E-06   | 0.00268918 |
| VDR          | 7.70040487 | 4.09917862 | 2.96E-05   | 0.00525799 |
| VCL          | 7.69273391 | 5.95653934 | 0.00082501 | 0.03740487 |
| PARP8        | 7.68220058 | 7.70785763 | 2.62E-05   | 0.00489929 |
| HMGCR        | 7.67781527 | 6.17133037 | 0.0002537  | 0.02064778 |
| KDSR         | 7.6774182  | 6.85738392 | 5.66E-07   | 0.00038509 |
| UQCRC1       | 7.67701125 | 7.2585047  | 0.00022672 | 0.01926601 |
| MGST2        | 7.66211585 | 3.48869294 | 0.00119816 | 0.04600384 |
| STOM         | 7.65573973 | 6.74556681 | 0.00019653 | 0.01756502 |
| ABAT         | 7.65568147 | 3.9374976  | 0.00013897 | 0.01410803 |
| SEC24C       | 7.65249115 | 6.37555516 | 0.00114717 | 0.04543745 |
| ROCK2        | 7.6418056  | 6.39384359 | 0.00094948 | 0.0403423  |
| GF11         | 7.63470143 | 4.91203771 | 0.0011686  | 0.04581554 |
| PSMC3        | 7.63444205 | 6.96654523 | 7.27E-05   | 0.00955323 |
| ZNF721       | 7.62567228 | 5.98157713 | 0.00092081 | 0.03966953 |
| ZNF512       | 7.62066088 | 5.92159953 | 0.00030451 | 0.02228611 |
| CCL20        | 7.58413215 | 7.16813086 | 2.35E-09   | 4.52E-06   |
| SQLE         | 7.55940126 | 5.76732024 | 1.32E-05   | 0.0032355  |
| EEF2K        | 7.55304279 | 4.80620899 | 0.00075286 | 0.03595365 |
| CYB5A        | 7.52376417 | 3.67310788 | 3.06E-05   | 0.00530419 |
| VAV1         | 7.51595981 | 6.08839291 | 5.26E-05   | 0.0077082  |
| ACADM        | 7.50971918 | 5.6171815  | 0.00020197 | 0.01781769 |
| PHTF1        | 7.50669011 | 5.07624197 | 4.74E-05   | 0.00711929 |
| PARP9        | 7.47999346 | 8.0106636  | 0.00062188 | 0.03249195 |
| S100PBP      | 7.44072742 | 6.42820595 | 0.00078186 | 0.03643521 |
| USE1         | 7.41894398 | 4.92843837 | 0.00094765 | 0.0403423  |
| ANKRD17      | 7.41367199 | 7.74600011 | 0.00013522 | 0.01395318 |
| MICU1        | 7.37859318 | 5.50566176 | 0.00040945 | 0.02555919 |
| GIMAP2       | 7.37697054 | 6.0163211  | 8.78E-06   | 0.00247523 |
| NOLC1        | 7.35507666 | 7.22202441 | 7.74E-08   | 0.00011188 |

|          |            |            |            |            |
|----------|------------|------------|------------|------------|
| HSD17B7  | 7.33418493 | 4.81176012 | 8.20E-05   | 0.01019001 |
| CTSB     | 7.31280651 | 8.05531276 | 3.88E-05   | 0.00623288 |
| C9orf142 | 7.284659   | 5.49425612 | 0.00076846 | 0.03610213 |
| POLR3D   | 7.24601759 | 3.82773232 | 0.00011733 | 0.01303837 |
| TWF2     | 7.23308146 | 2.70492324 | 0.00062258 | 0.03249195 |
| EXOC3    | 7.22094995 | 4.6032321  | 0.00030401 | 0.02228611 |
| ACAT2    | 7.21834758 | 6.28197015 | 4.13E-05   | 0.00645547 |
| ASB6     | 7.21077463 | 5.63624465 | 0.00134231 | 0.0482034  |
| ETNK1    | 7.18214135 | 8.7629237  | 0.00025742 | 0.02071523 |
| C16orf91 | 7.14047046 | 4.75448625 | 0.00143051 | 0.04964693 |
| VAT1     | 7.12539263 | 3.92439107 | 0.0001158  | 0.01302893 |
| RASSF2   | 7.09434274 | 6.44933729 | 4.66E-05   | 0.00709183 |
| WDR12    | 7.06492168 | 5.60499788 | 9.22E-05   | 0.01098839 |
| ATP2B4   | 7.05673463 | 7.48389126 | 2.20E-06   | 0.00109366 |
| TMCO1    | 7.05047438 | 7.28388906 | 0.00027525 | 0.0214557  |
| TBC1D31  | 7.05047103 | 4.4367143  | 0.00125913 | 0.04679881 |
| STX4     | 7.0458526  | 4.84880928 | 0.00086666 | 0.03812104 |
| CALHM2   | 7.04013229 | 5.21165151 | 2.32E-05   | 0.00469404 |
| PTK2     | 7.03894419 | 6.50587213 | 0.00033876 | 0.02387214 |
| SH2D2A   | 7.03103406 | 4.74566367 | 0.00017835 | 0.01662237 |
| PIK3R2   | 7.02852109 | 3.53388043 | 0.00104874 | 0.04328682 |
| CPSF1    | 7.02295229 | 4.67404019 | 0.00059681 | 0.03193226 |
| ILK      | 7.00656365 | 6.60036193 | 0.00051995 | 0.02989568 |
| FAM219B  | 7.00537927 | 5.66325167 | 0.00036888 | 0.0247585  |
| LIMA1    | 6.99570819 | 5.48051423 | 0.00028422 | 0.02161037 |
| AP3M2    | 6.98877392 | 7.46287515 | 0.00015482 | 0.01491488 |
| ZMYM6NB  | 6.9728444  | 6.09774653 | 0.00044435 | 0.02683764 |
| TLE3     | 6.95463042 | 7.06837563 | 0.00040152 | 0.02540987 |
| GLRX3    | 6.94569695 | 6.70049445 | 0.00024829 | 0.02049613 |
| AMICA1   | 6.92295987 | 8.64105855 | 2.31E-07   | 0.00024261 |
| TRMT6    | 6.91559323 | 5.76830169 | 0.00064388 | 0.03307242 |
| DROSHA   | 6.89523975 | 6.43608722 | 0.00053785 | 0.03062045 |
| MICALL1  | 6.88378593 | 4.79498457 | 7.75E-05   | 0.0098978  |
| RBM28    | 6.87903782 | 5.29721727 | 0.00049245 | 0.0290191  |
| MYBL1    | 6.84613781 | 5.82019146 | 2.22E-05   | 0.00463885 |
| AAED1    | 6.82545492 | 6.70408047 | 0.00025973 | 0.02071523 |
| LRRC42   | 6.80244562 | 5.29553936 | 2.70E-05   | 0.00495002 |
| ATIC     | 6.78234236 | 7.89929618 | 0.00055011 | 0.03071315 |
| RBBP5    | 6.7808561  | 7.21502375 | 0.00057223 | 0.0314152  |
| TPRKB    | 6.77578885 | 5.13587424 | 0.00083563 | 0.03748528 |
| SEH1L    | 6.77257562 | 5.6968755  | 0.00144563 | 0.04987215 |
| AP2M1    | 6.76810053 | 7.15837257 | 0.00053473 | 0.03059337 |
| CREBZF   | 6.75126827 | 4.84561612 | 0.00101704 | 0.04243298 |
| TST      | 6.73384431 | 3.71787408 | 7.64E-06   | 0.00238633 |
| C4orf27  | 6.72665951 | 4.63837104 | 0.00124247 | 0.04668928 |
| AP1G2    | 6.7027721  | 7.79776636 | 4.03E-07   | 0.00029248 |

|          |            |            |            |            |
|----------|------------|------------|------------|------------|
| VIPR1    | 6.69264297 | 5.69486852 | 0.00117524 | 0.04581554 |
| GBP1     | 6.6794812  | 8.11829442 | 0.00030661 | 0.02228611 |
| MAP3K13  | 6.62022787 | 4.76208756 | 0.00107787 | 0.04382663 |
| ZBTB43   | 6.5821911  | 6.92368238 | 0.00121114 | 0.04619535 |
| AUTS2    | 6.58185041 | 3.87935326 | 0.00038931 | 0.02540987 |
| OSBP     | 6.55042369 | 6.93951498 | 0.00070255 | 0.03469822 |
| FYCO1    | 6.53071713 | 6.83315521 | 8.18E-06   | 0.00247523 |
| RAB10    | 6.52904505 | 6.11166915 | 0.00060832 | 0.03224912 |
| SNORD63  | 6.52709193 | 3.39216405 | 0.00044215 | 0.02683764 |
| PREB     | 6.51328771 | 6.48175566 | 5.63E-05   | 0.00774311 |
| EIF3I    | 6.50527641 | 8.99658608 | 0.00044586 | 0.02683764 |
| COA4     | 6.50419117 | 5.90236957 | 0.00087014 | 0.03812104 |
| ZNF200   | 6.50354945 | 4.75101565 | 7.94E-05   | 0.00997452 |
| LYPLA2   | 6.49159987 | 6.82501623 | 0.00016322 | 0.01546151 |
| HDHD1    | 6.48335461 | 6.56124486 | 0.00036032 | 0.02465156 |
| ZNF143   | 6.45431556 | 5.24465794 | 0.00082048 | 0.03740487 |
| KLHDC1   | 6.44248351 | 2.24974316 | 0.00046116 | 0.02761486 |
| TRAPPC3  | 6.40387289 | 4.64343697 | 0.00046961 | 0.02793966 |
| LARP1B   | 6.40219482 | 5.84260892 | 0.00082556 | 0.03740487 |
| CDK2AP2  | 6.39834256 | 6.22968104 | 1.40E-05   | 0.00329053 |
| MSANTD3  | 6.38528405 | 4.04806801 | 0.00069558 | 0.03465    |
| RNASEH2C | 6.37167005 | 5.76055294 | 1.64E-05   | 0.00365448 |
| TIPARP   | 6.34227138 | 7.14901918 | 0.00022423 | 0.01919586 |
| SLC41A1  | 6.32948254 | 4.31710341 | 0.00127307 | 0.04710973 |
| RARB     | 6.30300623 | 2.1454417  | 0.00031683 | 0.02274267 |
| SYPL1    | 6.27884326 | 7.22115246 | 0.0011804  | 0.04581554 |
| VPS53    | 6.27174126 | 4.78805374 | 0.00086477 | 0.03812104 |
| MLKL     | 6.2607403  | 5.9015358  | 0.00056672 | 0.0314152  |
| MAPKAP1  | 6.22697964 | 5.72663161 | 9.92E-05   | 0.01170016 |
| C3orf58  | 6.18618687 | 5.88428743 | 0.0001426  | 0.01410803 |
| SDHD     | 6.16605282 | 7.58425198 | 0.00068135 | 0.03408827 |
| CD82     | 6.16297424 | 7.19871658 | 0.00036051 | 0.02465156 |
| TFCP2    | 6.10993465 | 6.40176416 | 8.13E-07   | 0.00049429 |
| GHITM    | 6.09828624 | 7.97645766 | 0.00024275 | 0.02018295 |
| EIF6     | 6.09823715 | 8.24741896 | 0.00029253 | 0.0218115  |
| ZNF544   | 6.09246148 | 2.77687978 | 0.00075714 | 0.03600949 |
| C9orf69  | 6.05398854 | 3.04408619 | 0.00013181 | 0.01384842 |
| METTL2B  | 6.04809405 | 4.88890357 | 0.00040863 | 0.02555919 |
| ALDH18A1 | 6.04635344 | 2.61861687 | 0.00056878 | 0.0314152  |
| CUL4A    | 6.03286626 | 7.02556612 | 0.00012819 | 0.0136816  |
| ZNF232   | 6.00820835 | 6.30374032 | 0.00122987 | 0.04668928 |
| ARPC5    | 6.00036208 | 7.39307506 | 3.44E-05   | 0.00576927 |
| ABHD15   | 5.9979624  | 3.93914842 | 0.00139926 | 0.04930252 |
| TMEM9    | 5.99431031 | 2.17933815 | 0.00043674 | 0.02670611 |
| TRPV2    | 5.99360062 | 7.19408938 | 0.00011851 | 0.0130444  |
| CD63     | 5.98680667 | 7.80657946 | 1.02E-05   | 0.00273019 |

|          |            |            |            |            |
|----------|------------|------------|------------|------------|
| LPIN2    | 5.97759239 | 7.27579357 | 0.00014283 | 0.01410803 |
| DCTD     | 5.96980927 | 5.79559354 | 0.0006324  | 0.03277443 |
| MED11    | 5.96549115 | 5.24821123 | 0.00064062 | 0.03305177 |
| ZNF8     | 5.93020351 | 7.68954299 | 0.00025304 | 0.02064778 |
| SOS1     | 5.90469936 | 7.59909646 | 5.87E-05   | 0.00797055 |
| SUMF2    | 5.89426761 | 7.30963547 | 0.00080056 | 0.03700844 |
| BRK1     | 5.8712662  | 6.65905694 | 0.0010126  | 0.04243298 |
| AKR1A1   | 5.84078637 | 6.18193594 | 0.00057359 | 0.0314152  |
| TTLL12   | 5.83680573 | 5.46242304 | 8.89E-05   | 0.01069657 |
| MAP1LC3B | 5.82519805 | 7.44785179 | 0.0005088  | 0.02940105 |
| CWC22    | 5.81918493 | 7.37696367 | 0.00138007 | 0.04892458 |
| RHBDF2   | 5.80592726 | 3.77985046 | 0.00018593 | 0.01705385 |
| CARD6    | 5.77829847 | 4.7729826  | 0.00018744 | 0.01705692 |
| CLOCK    | 5.7622314  | 6.56574659 | 0.00041135 | 0.02555919 |
| SGPL1    | 5.71746865 | 7.59853263 | 0.00039763 | 0.02540987 |
| CAT      | 5.71604846 | 6.29066918 | 0.00028631 | 0.02162642 |
| TRAF7    | 5.69954335 | 2.03493985 | 0.00022906 | 0.01932262 |
| DIS3L    | 5.68375267 | 7.66945647 | 0.00010776 | 0.01233102 |
| ECSIT    | 5.68374482 | 3.91321033 | 0.00050833 | 0.02940105 |
| KLF10    | 5.63130645 | 5.62311977 | 0.00040235 | 0.02540987 |
| ARL3     | 5.62614888 | 4.98276931 | 8.46E-05   | 0.01040229 |
| B3GALNT2 | 5.55605597 | 6.16142437 | 0.00036262 | 0.02465156 |
| PCYT2    | 5.54517439 | 1.74260177 | 0.00090385 | 0.03926985 |
| CD40LG   | 5.5317536  | 7.04094733 | 1.42E-05   | 0.00329053 |
| MOB3A    | 5.47991122 | 6.76143748 | 0.0009447  | 0.0403423  |
| PDCD7    | 5.4746116  | 6.99771284 | 0.0002599  | 0.02071523 |
| RIC8B    | 5.43055696 | 2.56051259 | 0.00107667 | 0.04382663 |
| NETO2    | 5.40525032 | 4.2244922  | 2.25E-05   | 0.00463885 |
| ENOX2    | 5.31582645 | 5.24783907 | 0.00140445 | 0.0493351  |
| C17orf62 | 5.31524197 | 5.46097889 | 0.00142795 | 0.04964693 |
| TMEM150A | 5.29151341 | 1.00429746 | 0.00039287 | 0.02540987 |
| CCDC107  | 5.24678368 | 2.17929109 | 0.00134474 | 0.0482034  |
| STAT1    | 5.21734934 | 7.8062343  | 5.42E-05   | 0.00773629 |
| CCT3     | 5.19292465 | 8.27599188 | 0.00133961 | 0.0482034  |
| TRMT1L   | 5.1290898  | 2.21915382 | 0.00109042 | 0.04406304 |
| PPA2     | 5.11329556 | 7.16081493 | 0.00084951 | 0.03790636 |
| TEX261   | 5.08136953 | 4.74033808 | 0.00134721 | 0.0482034  |
| WDR60    | 5.07705085 | 5.64081373 | 0.0013338  | 0.0482034  |
| SLC25A29 | 5.06868438 | 1.13986806 | 0.00075076 | 0.03595365 |
| RRAS     | 5.02297446 | 4.38814763 | 0.00038334 | 0.02517199 |
| ENTPD1   | 4.95584407 | 6.4746755  | 0.00110063 | 0.04432047 |
| RGS9     | 4.89993952 | 2.22517088 | 0.00035182 | 0.0244936  |
| SENP6    | 4.85867469 | 6.9328289  | 0.00139413 | 0.0492721  |
| HMGCS1   | 4.84089855 | 7.27670063 | 0.00074137 | 0.03573932 |
| PTPN12   | 4.83622372 | 7.13150115 | 0.00019125 | 0.01726741 |
| ELMO1    | 4.78242449 | 7.02312929 | 0.00050811 | 0.02940105 |



|             |            |            |            |            |
|-------------|------------|------------|------------|------------|
| MFHAS1      | 4.71822209 | 6.08979598 | 0.00116738 | 0.04581554 |
| PDHB        | 4.63186742 | 7.59211113 | 0.00082856 | 0.03740487 |
| ENO1        | 4.59757935 | 10.7712917 | 0.00019758 | 0.01756502 |
| RUNX2       | 4.47912887 | 6.1803506  | 0.00118929 | 0.04581554 |
| NOL8        | 4.44758761 | 8.66184693 | 0.00073205 | 0.03573932 |
| LARS        | 4.44498609 | 7.92338387 | 0.00078724 | 0.03653889 |
| RASA4B      | 4.41253734 | 1.0491613  | 0.00118808 | 0.04581554 |
| PGK1        | 4.41043419 | 8.70912563 | 0.00059962 | 0.03193461 |
| C11orf24    | 4.35030789 | 3.63162555 | 0.00037305 | 0.02477809 |
| CMTM8       | 4.28550364 | 3.67279979 | 0.00091842 | 0.03966953 |
| RRP15       | 4.27236896 | 7.71364778 | 0.00099193 | 0.04199174 |
| BTN3A2      | 4.25346351 | 7.60800189 | 0.00067668 | 0.03408827 |
| PARD6A      | 4.19948315 | 0.64404246 | 0.00082464 | 0.03740487 |
| C3orf14     | 3.95380813 | 2.60646707 | 0.00108078 | 0.04382663 |
| PVRL3       | 3.94377317 | 2.29820692 | 0.00124429 | 0.04668928 |
| IL5         | 3.92005589 | 4.70370343 | 0.00114803 | 0.04543745 |
| LOC10192694 | 3.89538987 | 1.59774562 | 0.00076293 | 0.03610213 |
| BBS7        | 3.87474725 | 4.17284062 | 0.00134698 | 0.0482034  |
| PA2G4       | 3.82820952 | 8.581664   | 0.00125936 | 0.04679881 |
| MSRB2       | 3.4540417  | 2.90545385 | 0.00107141 | 0.04382663 |
| LYSMD1      | 3.44895163 | 4.59525842 | 0.00143965 | 0.04981436 |
| ZBTB45      | 3.29383507 | 0.40447711 | 0.00131463 | 0.04807972 |
| PLXNA3      | 3.19532072 | 3.10801533 | 0.00072843 | 0.03573932 |
| ARF6        | 3.1166154  | 9.68382583 | 0.00073628 | 0.03573932 |
| TPTE2P5     | -1.7496117 | 7.3158981  | 0.00121    | 0.04619535 |
| TGFB3       | -2.565088  | 7.3498374  | 0.00037062 | 0.0247585  |
| SLC46A3     | -3.6424903 | 6.55300514 | 0.00101426 | 0.04243298 |
| SGCB        | -4.4624568 | 8.22353393 | 0.00031407 | 0.0226857  |
| EIF1B       | -4.5245626 | 8.92156378 | 0.0012378  | 0.04668928 |
| KDM5D       | -4.6069805 | 5.9959679  | 0.00027662 | 0.0214557  |
| ZNF184      | -4.668325  | 5.71340697 | 0.00107217 | 0.04382663 |
| IGHMBP2     | -4.7918513 | 6.66086908 | 0.00092335 | 0.03966953 |
| LCMT1       | -4.8604724 | 6.73528854 | 0.00087244 | 0.03812104 |
| PLEKHM1P    | -5.0646813 | 5.19591878 | 0.00111167 | 0.04460966 |
| MEAF6       | -5.1433191 | 7.42117596 | 0.00083683 | 0.03748528 |
| PTBP2       | -5.1815366 | 8.40543774 | 0.00066467 | 0.03383961 |
| LOC10192723 | -5.4679352 | 5.12554765 | 0.00118751 | 0.04581554 |
| ZC3H7A      | -5.4742351 | 7.47678577 | 0.00059483 | 0.03193226 |
| HEATR1      | -5.5772668 | 8.11620897 | 0.00054839 | 0.03071315 |
| LRRC8C      | -5.7229883 | 7.01586858 | 0.00103364 | 0.04287001 |
| ZNF550      | -5.7925238 | 8.96446931 | 0.00065035 | 0.0332571  |
| ZBTB21      | -5.8201955 | 5.68579365 | 0.00124894 | 0.04671189 |
| GORAB       | -5.8579261 | 6.11120293 | 0.00127588 | 0.04710973 |
| MAP1B       | -5.861683  | 5.88103303 | 0.00058837 | 0.03177464 |
| ZNF586      | -5.9792542 | 7.10433355 | 0.00047142 | 0.02793966 |
| ACOT9       | -5.9900033 | 5.58429797 | 0.00039896 | 0.02540987 |

|             |            |            |            |            |
|-------------|------------|------------|------------|------------|
| MXD1        | -6.1429764 | 5.22570917 | 0.00036785 | 0.0247585  |
| GORASP1     | -6.1780438 | 6.8678218  | 1.57E-05   | 0.0035678  |
| PPM1A       | -6.2829852 | 6.88925223 | 0.00112201 | 0.04471386 |
| SNRNP27     | -6.4694434 | 8.02722382 | 2.53E-05   | 0.00487505 |
| KIAA0196    | -6.5252936 | 7.50731869 | 0.00034498 | 0.02416321 |
| COMMD9      | -6.5477511 | 7.67882966 | 0.00027905 | 0.02149955 |
| ZNF335      | -6.6685008 | 7.05335725 | 0.00049466 | 0.0290191  |
| DUSP10      | -6.6872906 | 7.89179867 | 5.63E-05   | 0.00774311 |
| SYNJ1       | -6.7376598 | 6.39363678 | 0.00141883 | 0.04953915 |
| LRRC37B     | -6.8549507 | 7.6222467  | 0.00070021 | 0.03469822 |
| FLJ10038    | -6.8773765 | 6.05763206 | 0.00033489 | 0.02374405 |
| BRWD1       | -7.0277893 | 8.92892884 | 3.08E-05   | 0.00530419 |
| ASB8        | -7.0491453 | 7.74029356 | 0.00118573 | 0.04581554 |
| NLRC5       | -7.0767718 | 7.49587407 | 0.00061222 | 0.03230796 |
| MR1         | -7.0837256 | 8.12675688 | 0.00027266 | 0.0214557  |
| OSER1       | -7.0996972 | 8.24647251 | 0.00087411 | 0.03812104 |
| MLH1        | -7.2406165 | 6.44896763 | 0.00012904 | 0.0136816  |
| CCDC28A     | -7.251837  | 6.66554177 | 0.000207   | 0.01812361 |
| CLPX        | -7.2579465 | 5.67598363 | 0.00037742 | 0.02492472 |
| PDCL        | -7.2580142 | 7.79754596 | 0.00140918 | 0.04935105 |
| SUPV3L1     | -7.4396752 | 6.00832267 | 0.00062414 | 0.03249195 |
| IL24        | -7.4649043 | 5.70398808 | 0.00022006 | 0.01897968 |
| MASP2       | -7.4801524 | 6.31643447 | 0.00137943 | 0.04892458 |
| HLA-DQA1    | -7.4858958 | 6.24926548 | 0.00128733 | 0.04738096 |
| SNORA27     | -7.6343202 | 7.71155072 | 0.00057784 | 0.0314152  |
| LOC146880   | -7.691636  | 6.71821548 | 0.00111708 | 0.04467174 |
| MPPE1       | -7.7696867 | 5.54013932 | 0.00010664 | 0.01233102 |
| KLHL24      | -7.886491  | 8.53157343 | 2.27E-06   | 0.00109366 |
| STK38L      | -7.9258592 | 4.9157942  | 0.00011612 | 0.01302893 |
| BTBD9       | -7.9697514 | 5.63344467 | 0.00054192 | 0.03070064 |
| TTY15       | -8.0390544 | 6.87054594 | 7.27E-05   | 0.00955323 |
| NEDD4L      | -8.0481002 | 7.71528851 | 4.94E-06   | 0.00196743 |
| SNORD102    | -8.1489892 | 6.51306708 | 0.00086441 | 0.03812104 |
| PYHIN1      | -8.1577961 | 8.55091807 | 5.93E-05   | 0.00797055 |
| RHBDD2      | -8.1851967 | 7.65316374 | 0.00010693 | 0.01233102 |
| GXYLT1      | -8.1992613 | 5.33658311 | 0.00076655 | 0.03610213 |
| ZC3H12D     | -8.2048878 | 6.13458685 | 0.0001589  | 0.0151772  |
| HDAC4       | -8.2668549 | 5.87776962 | 7.57E-05   | 0.0098264  |
| FAM84B      | -8.3358554 | 4.58114683 | 0.00057899 | 0.0314152  |
| RBM33       | -8.336935  | 7.51984071 | 0.0013727  | 0.04892458 |
| COQ10B      | -8.4884899 | 6.17236752 | 0.00017979 | 0.01662301 |
| LOC10012856 | -8.4924103 | 4.5025327  | 0.00030621 | 0.02228611 |
| ICA1L       | -8.5264788 | 7.32712864 | 1.39E-05   | 0.00329053 |
| TATDN3      | -8.5339479 | 6.99697818 | 0.00029065 | 0.0218115  |
| RNF111      | -8.9421034 | 6.46546938 | 8.55E-06   | 0.00247523 |
| PER1        | -8.9707919 | 5.19415728 | 0.00016883 | 0.01586334 |

|             |            |            |            |            |
|-------------|------------|------------|------------|------------|
| INTS12      | -9.0412499 | 6.39886387 | 7.79E-05   | 0.0098978  |
| ZBTB25      | -9.0604464 | 9.89771676 | 3.14E-06   | 0.00142296 |
| RAB30       | -9.0955685 | 7.79663142 | 2.42E-05   | 0.00474846 |
| PTTG1       | -9.0988446 | 6.21344848 | 0.00067192 | 0.03405858 |
| SNX11       | -9.1968296 | 6.179153   | 0.00032895 | 0.02346723 |
| YAF2        | -9.2427673 | 6.7527737  | 1.30E-05   | 0.0032355  |
| FAM160B1    | -9.392502  | 6.67444329 | 5.71E-06   | 0.00206256 |
| CCDC186     | -9.4204637 | 7.14654356 | 0.00014132 | 0.01410803 |
| NSUN3       | -9.4540092 | 6.35943492 | 1.72E-05   | 0.00375113 |
| DDX3Y       | -9.5274759 | 9.17710606 | 5.06E-10   | 1.95E-06   |
| METTL4      | -9.6394485 | 7.6456865  | 4.05E-07   | 0.00029248 |
| MIR4435-1HC | -9.6404646 | 5.91889937 | 5.33E-05   | 0.0077082  |
| PPM1B       | -9.7943409 | 7.34038332 | 2.71E-07   | 0.00026082 |
| SEPSECS     | -10.369025 | 6.88112711 | 1.24E-06   | 0.00065201 |
